# Supplementary material for: Delineating the genetic heterogeneity of ALS using targeted high-throughput sequencing
Source: PubMed Central journal article supplement — J Med Genet. 2013 Jul 23;50(11):776–83. doi: 10.1136/jmedgenet-2013-101795 (PMC3812897; doi:10.1136/jmedgenet-2013-101795), 2013-07-23
Supplement: jmedgenet-2013-101795-s1.pdf [file jmedgenet-2013-101795-s1.pdf]

## Supplementary materials and methods

### *Targeted resequencing*

RNA probes complementary in sequence to the coding exons ( $\pm$  2bp) of target genes were designed using e-array (<https://earray.chem.agilent.com/earray/>) and manufactured as part of custom SureSelect kits (Agilent, Santa Clara, CA). A tiling frequency of 2x was selected during kit design and small target intervals were extended such that all intervals were targeted by at least 2 distinct probes. Paired end Illumina sequencing libraries were prepared for 444 cases and 311 controls using DNA extracted from venous blood (KBioscience, Herts, England). Libraries were subsequently enriched for target sequences using the custom SureSelect kits. Library preparation and target enrichment was performed as per the “SureSelect Target Enrichment System for Illumina Paired-End Sequencing Library protocol version 2.3” protocol with the following modifications. 1) Only 1  $\mu$ g of DNA was used in library preparations. 2) DNA fragmentation was performed either using a Covaris system (Covaris, Woburn, MA) as per the manufacturer's instructions, enzymatically or through sonication. Where enzymatic fragmentation was performed, 15.8  $\mu$ l of DNA (63.3 ng/ $\mu$ l) was incubated with 2  $\mu$ l NEBNext dsDNA fragmentase (New England Biolabs, Ipswich, MA) in NEBNext fragmentase reaction buffer @ 30 °C for 20 min. 5  $\mu$ l of 0.5 M EDTA was then used to stop the reaction. Where fragmentation was performed through sonication, 100  $\mu$ l of DNA (10 ng/ $\mu$ l) was subjected to 60 min of sonication (30 sec on, 30 sec off) using a Bioruptor (Diagenode, Liège, Belgium) at low power. 3) Extended Illumina adapters including 6 bp indexes were used in place of standard adapters (Metabion, Martinsried, Germany). All indexes were at least an edit distance of 2 from one another. 4) Following adapter ligation, libraries were subjected to electrophoresis through a 2% Low Range Ultra agarose gel (BioRad, Hercules, CA) stained with SYBR Green 1 nucleic acid gel stain (Sigma, Arklow, Ireland) for 90 mins @ 140 V. Fragments of 300 – 400 bp were manually

excised from gel, using a Safe Imager™ 2.0 Blue Light Transilluminator (Invitrogen, Carlsbad, CA) for visualization. DNA was extracted from gel slices using QIAquick Gel Extraction Kits (Qiagen, West Sussex, UK) as per the manufacturer's instructions. 5) 5 cycles of PCR were performed instead of 4 prior to target enrichment, and Phusion (New England Biolabs) was used for all PCR reactions. 6) Libraries labelled with distinct indexes were pooled prior to target enrichment such that the expected sequence coverage of target intervals would have a mean of ~ 30x per sample. 203 case libraries were resequenced by 80 bp paired-end resequencing on an Illumina Genome Analyzer II at TrinSeq, Institute of Molecular Medicine, Trinity College Dublin, Ireland. The remainder of libraries were resequenced by 101 bp single-end sequencing on a HiSeq 2000 at GATC Biotech AG, Konstanz, Switzerland.

#### *Analysis of sequence data*

Sequencing reads were aligned using BWA to build GRCh37 of the human genome ([http://www.broadinstitute.org/gsa/wiki/index.php/GSA\\_FTP\\_Server](http://www.broadinstitute.org/gsa/wiki/index.php/GSA_FTP_Server)). Alignments were annotated with sample of origin based on detected adapter indexes. SAMtools was used to sort and index alignment files. Picard was used to merge alignment files and remove PCR duplicates. The GATK was used to perform local indel realignment, recalibrate base quality (BQ) scores, determine per sample depth of coverage across target intervals, call variants and assign sample genotypes. Base calls were only considered for depth of coverage analyses or variant calling when they were associated with BQ scores  $\geq 20$  and alignment mapping quality scores  $\geq 20$ .

#### *Variant annotation and quality control*

The effects of variants at the protein level were predicted using Variant Effect Predictor version 2.7 (<http://www.ensembl.org/info/docs/variation/vep/index.html>) and Ensembl 69 (<http://www.ensembl.org/>). Predictions were based only on transcripts annotated as protein coding and included PolyPhen and SIFT pathogenicity classifications. Genotype frequencies within external control cohorts were imported from the March 2012 release of the 1000 genomes project (<http://www.1000genomes.org/>) and the ESP6500 release of the NHLBI exome sequencing project (Exome Variant Server, NHLBI Exome Sequencing Project (ESP), Seattle, WA (URL: <http://evs.gs.washington.edu/EVS/>) [Accessed 2012 Jul 18]). Variants were assigned a status of either “pass” or “fail” based on whether they met a series of quality control criteria. These criteria included a minimum variant quality score of 30, a genotype call rate  $\geq 10\%$ , and “QD”, “FS”, “ReadPosRankSum” and “HaplotypeScore” values within the range observed for the subset of variants noted also to have been reported by the 1000 genomes or NHLBI Exome Sequencing projects. Additionally, novel case variants which were observed to occur only *in cis* with other novel case variants were interpreted as possible misalignments and assigned a status of “fail”. Variant quality score, “QD”, “FS”, “ReadPosRankSum” and “HaplotypeScore” values were calculated using the GATK. Genotype calls associated with genotype quality scores  $< 15$  were reset to missing prior to variant quality control.

#### *Estimation of variant detection power*

For each target position, per sample sequence coverage was used to calculate the expected total of resequenced chromosomes. The probability of including a mutated chromosome among this total was then calculated for a range of minor allele frequencies using R version 2.14.1 (<http://www.r-project.org/>). Both the sampling of patients from the Irish ALS population and the sampling of chromosomes during resequencing were assumed to follow binomial distributions.

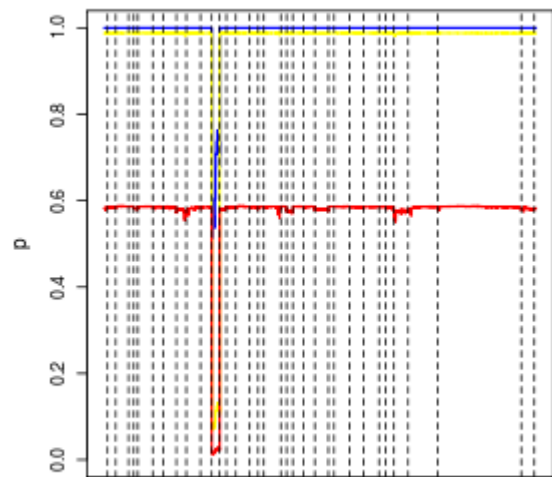

ALS2

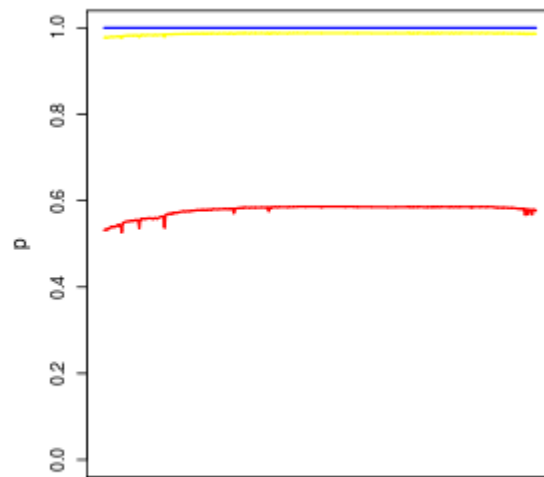

ANG

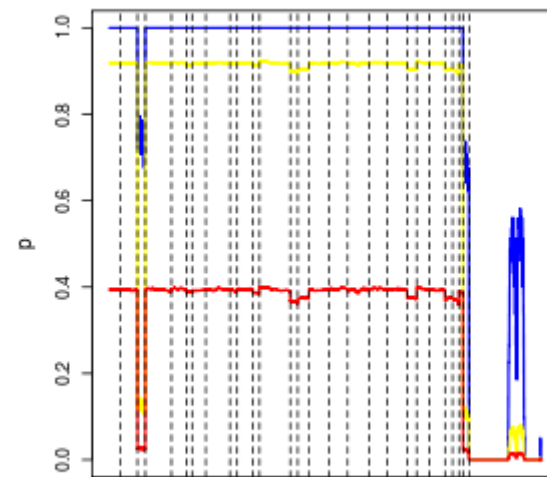

ATXN2

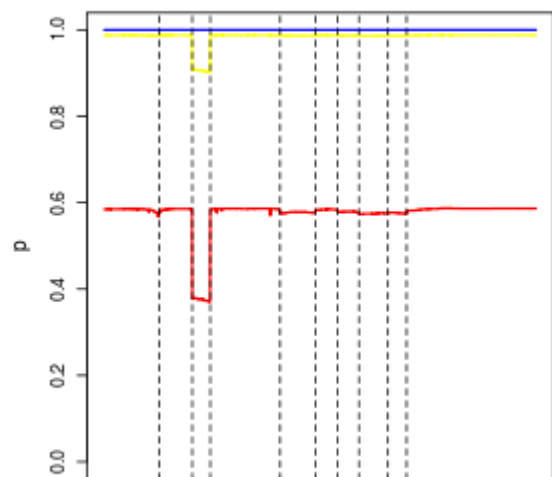

C9orf72

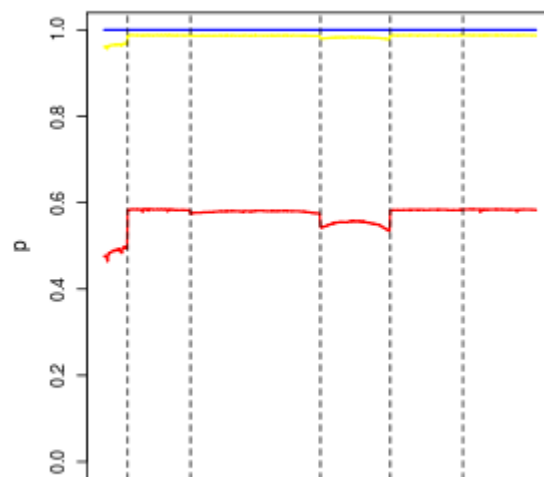

CHMP2B

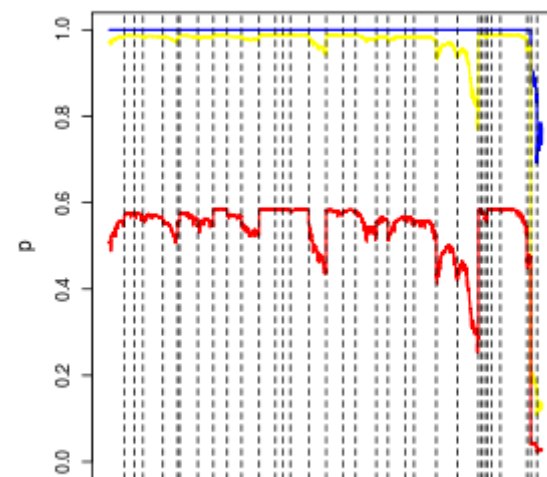

DCTN1

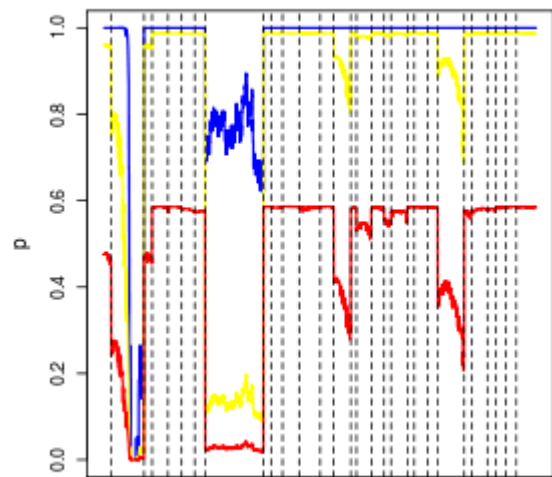

DPP6

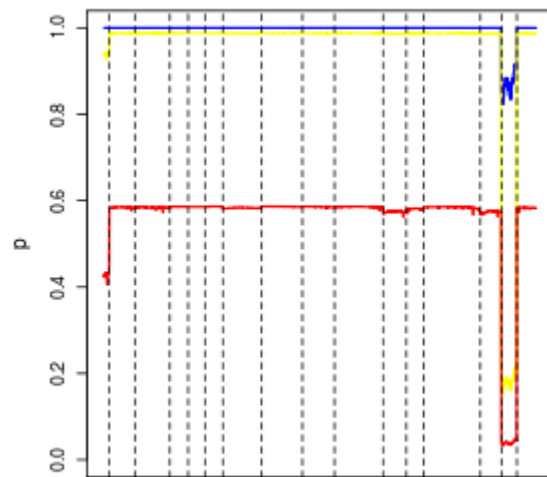

ELP3

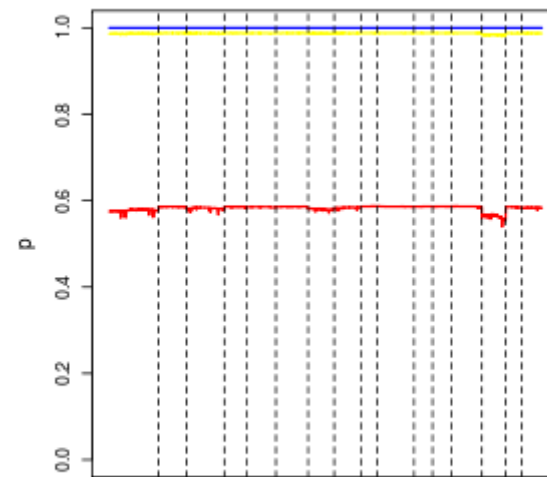

FGGY

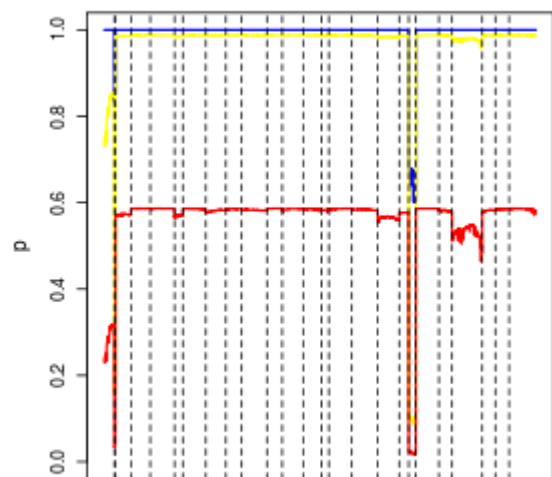

FIG4

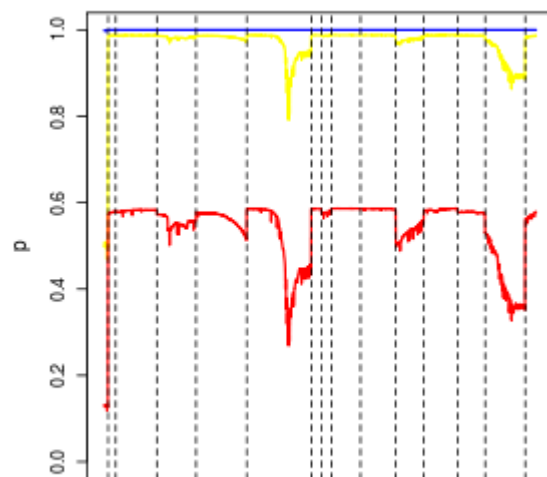

FUS

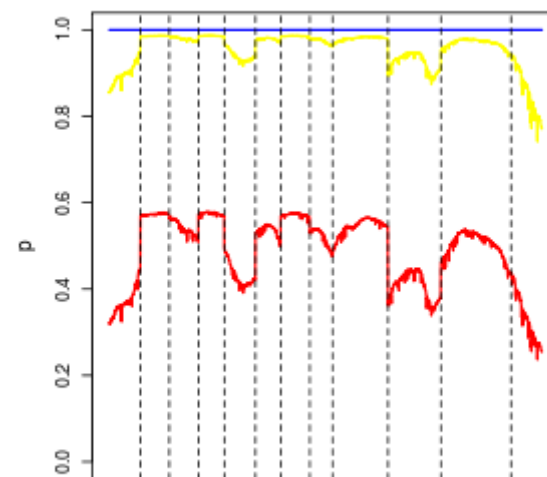

GRN

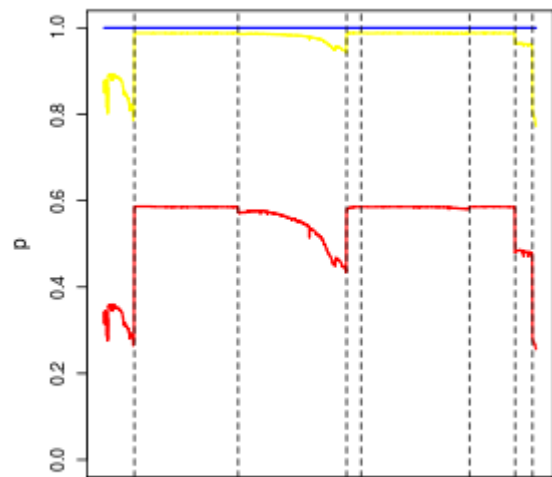

HFE

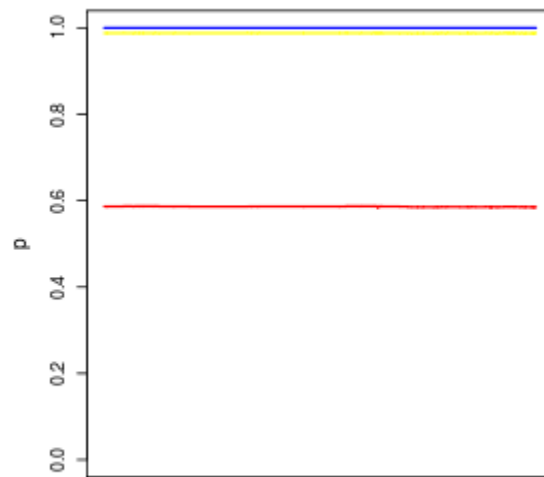

IFNK

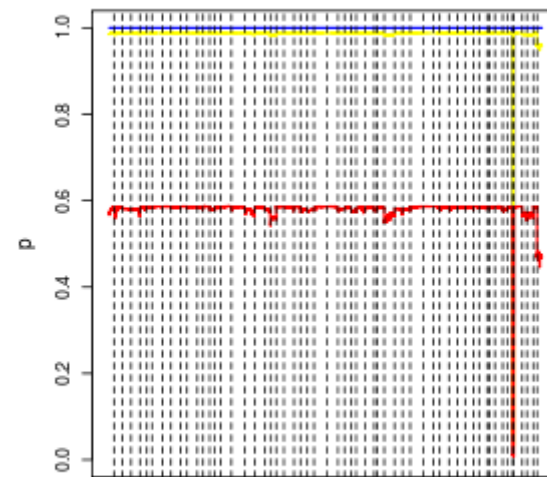

ITPR2

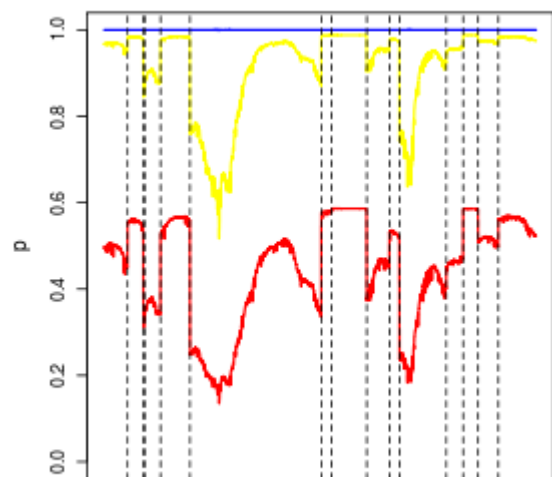

MAPT

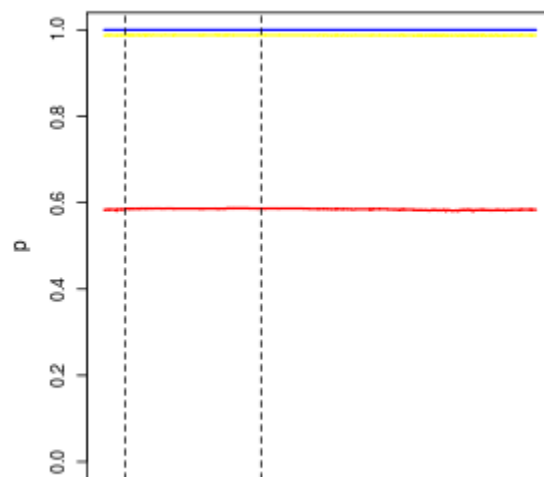

MOB3B

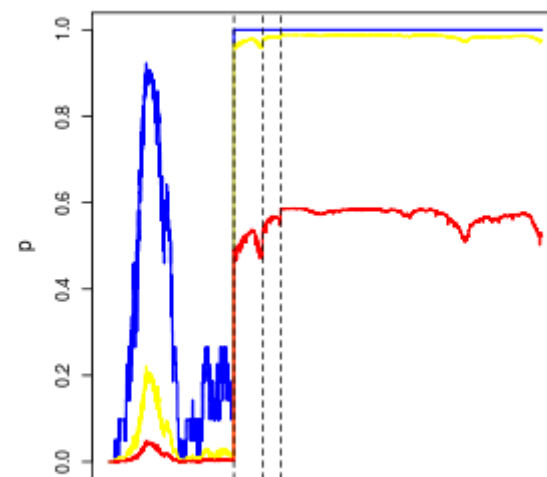

NEFH

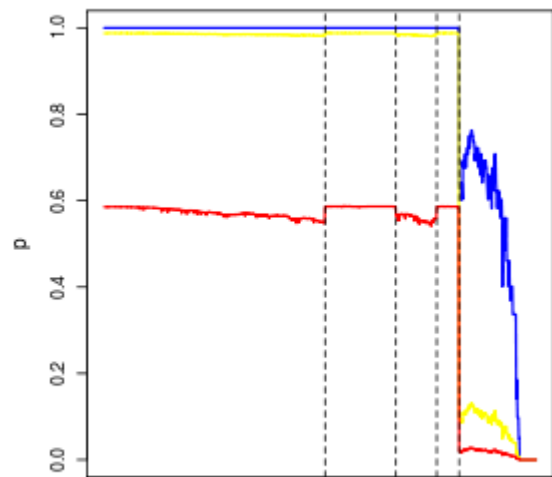

NIPA1

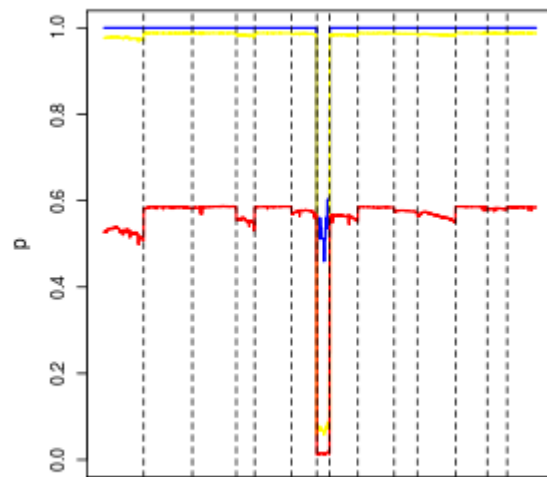

OPTN

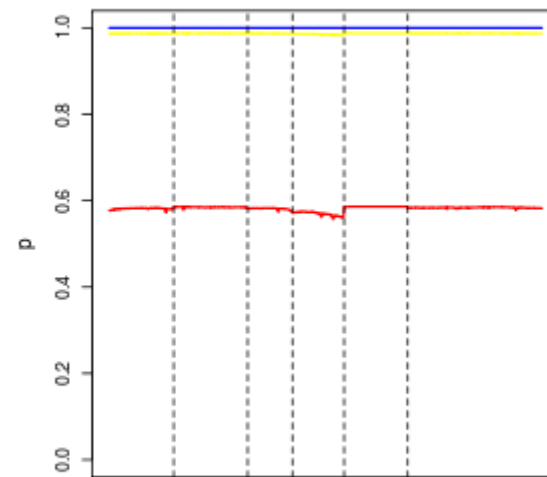

PARK7

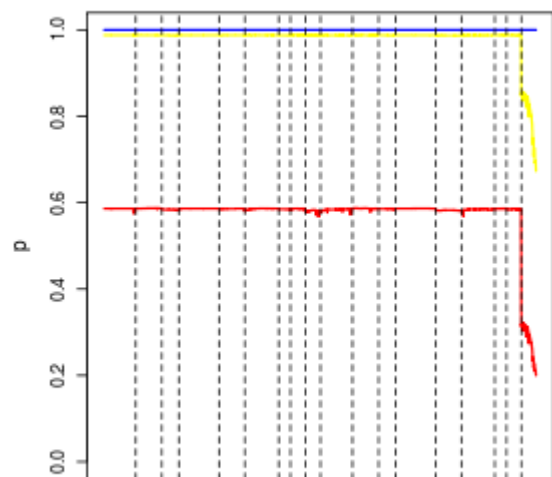

PON1

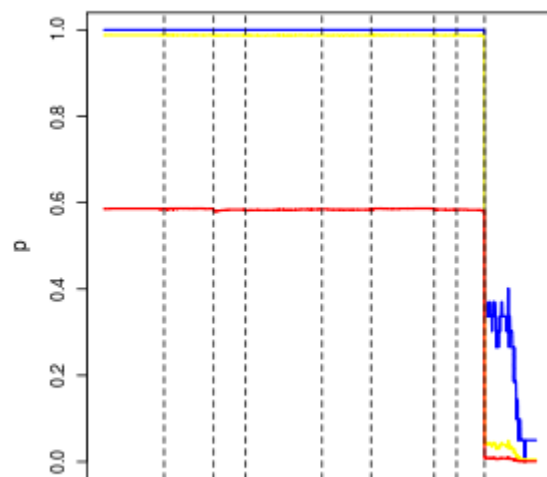

PON2

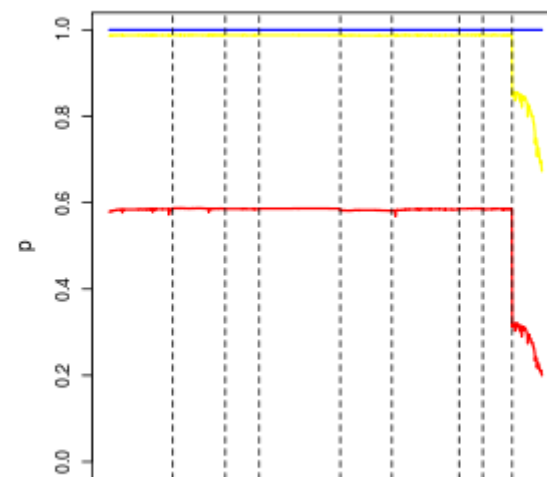

PON3

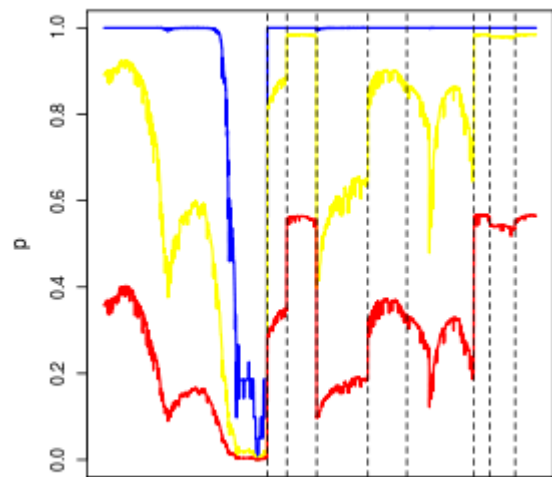

PRPH

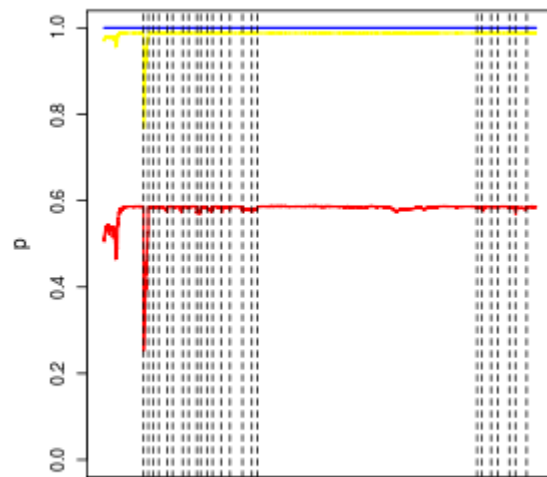

SETX

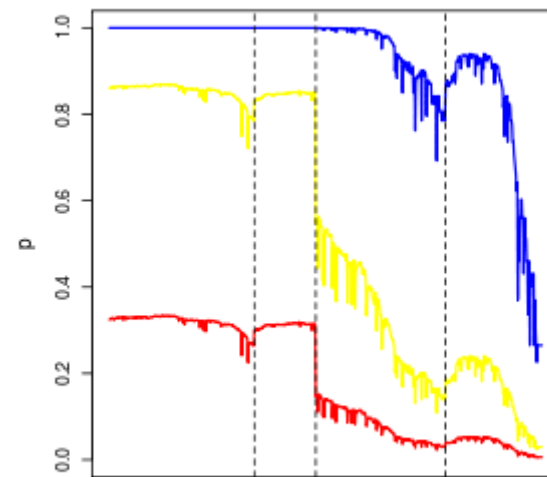

SIGMAR1

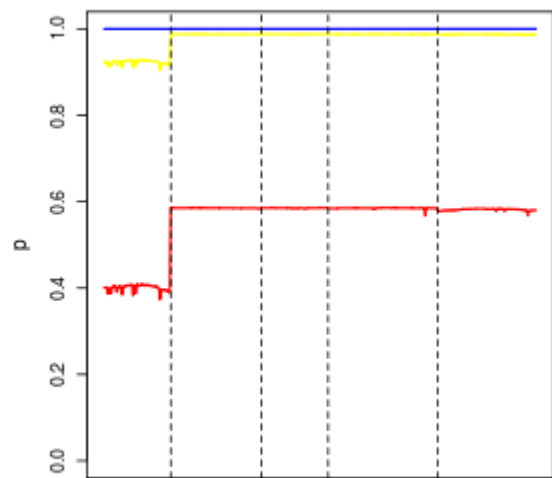

SOD1

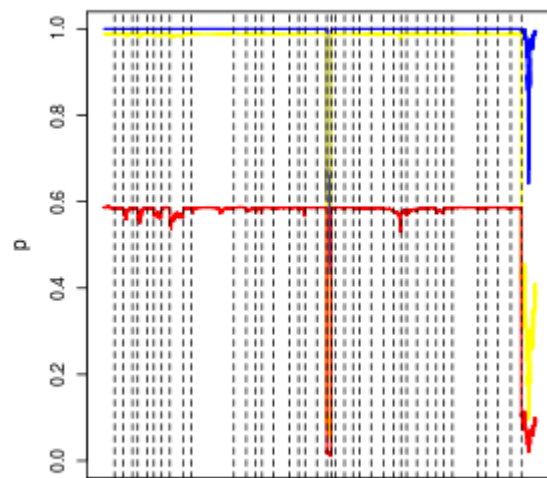

SPG11

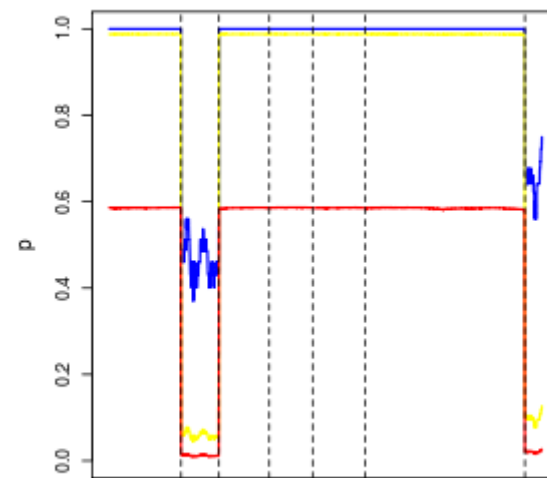

TARDBP



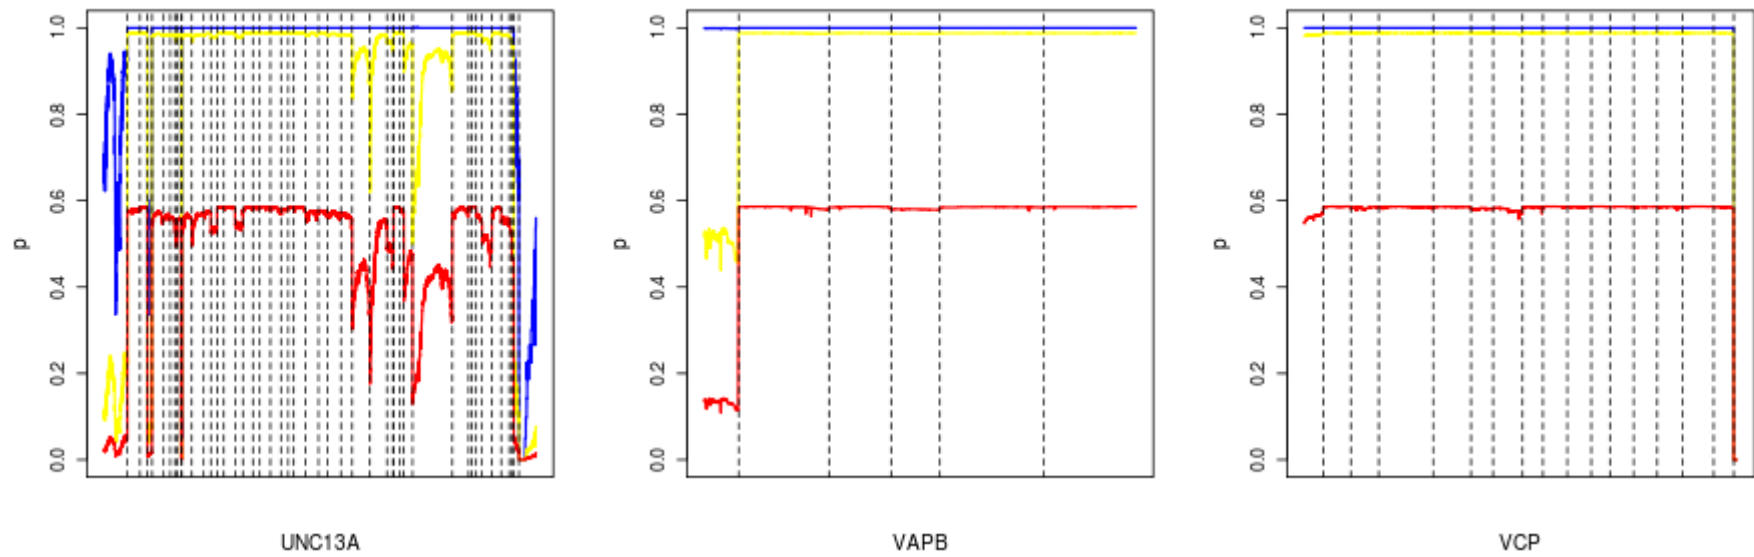

**Figure S1: Variant detection power**

The horizontal axes denote position within the coding sequence of each target gene. The vertical axes denote the probability that a variant with an allele frequency of 5% (blue line), 0.5% (yellow line) or 0.1% (red line) among Irish ALS patients was sampled during resequencing. The coding sequence of a target gene refers to the union of all coding transcripts reported in Ensembl 69. Exon boundaries are demarcated by vertical dotted lines.

**Table S1: Target gene resequencing**

| Gene    | Designation               | % Sequenced<br>( $\geq 1$ X coverage) | Mean Case Coverage |
|---------|---------------------------|---------------------------------------|--------------------|
| ALS2    | Mendelian                 | 100                                   | 35.6 + 25.4        |
| ANG     | Mendelian                 | 100                                   | 30.4 + 22.2        |
| ATXN2   | Low penetrance/ tentative | 87.1                                  | 21.4 + 26.7        |
| C9orf72 | Mendelian                 | 100                                   | 36.7 + 27.1        |
| CHMP2B  | Low penetrance/ tentative | 100                                   | 25.8 + 19.7        |
| DCTN1   | Low penetrance/ tentative | 100                                   | 16.6 + 17.1        |
| DPP6    | Low penetrance/ tentative | 98.8                                  | 20.6 + 22.2        |
| ELP3    | Low penetrance/ tentative | 100                                   | 32.3 + 21.9        |
| FGGY    | Low penetrance/ tentative | 100                                   | 30.8 + 20.1        |
| FIG4    | Low penetrance/ tentative | 100                                   | 33.4 + 24.3        |
| FUS     | Mendelian                 | 100                                   | 17.9 + 18.1        |
| GRN     | Low penetrance/ tentative | 100                                   | 10.1 + 12.3        |
| HFE     | Low penetrance/ tentative | 100                                   | 28.7 + 25.4        |
| IFNK    | Low penetrance/ tentative | 100                                   | 38.8 + 21.6        |
| ITPR2   | Low penetrance/ tentative | 100                                   | 31.6 + 21.3        |
| MAPT    | Low penetrance/ tentative | 100                                   | 12.4 + 18.8        |
| MOB3B   | Low penetrance/ tentative | 100                                   | 38.9 + 23.9        |
| NEFH    | Low penetrance/ tentative | 97.7                                  | 11.4 + 13.5        |
| NIPA1   | Low penetrance/ tentative | 96.1                                  | 22 + 20.7          |
| OPTN    | Mendelian                 | 100                                   | 21.3 + 15.9        |
| PARK7   | Low penetrance/ tentative | 100                                   | 26.7 + 18.1        |
| PON1    | Low penetrance/ tentative | 100                                   | 37.1 + 24.7        |

|         |                           |      |             |
|---------|---------------------------|------|-------------|
| PON2    | Low penetrance/ tentative | 99.9 | 34.7 + 25.3 |
| PON3    | Low penetrance/ tentative | 100  | 32.7 + 22.2 |
| PRPH    | Low penetrance/ tentative | 99.4 | 4.2 + 8.7   |
| SETX    | Mendelian                 | 100  | 41.2 + 25.7 |
| SIGMAR1 | Low penetrance/ tentative | 100  | 2.9 + 7.5   |
| SOD1    | Mendelian                 | 100  | 29.7 + 24.6 |
| SPG11   | Low penetrance/ tentative | 100  | 32.9 + 23.7 |
| TARDBP  | Mendelian                 | 100  | 30.3 + 22.1 |
| UNC13A  | Low penetrance/ tentative | 98.6 | 15.5 + 17.9 |
| VAPB    | Mendelian                 | 100  | 31.8 + 22.3 |
| VCP     | Mendelian                 | 99.2 | 34.1 + 23   |

**Table S2: ALS gene variants**

| Gene        | Class                     | Transcript                               | DNA                              | Amino.Acid                     | SIFT        | Poly Phen   | fALS          | sALS            | Irish           | European        | Global          |
|-------------|---------------------------|------------------------------------------|----------------------------------|--------------------------------|-------------|-------------|---------------|-----------------|-----------------|-----------------|-----------------|
| ALS2        | missense                  | *ENST00000264276, ENST00000467448        | c.1102G>A, c.1102G>A             | p.Val368Met, p.Val368Met       | 0, 0        | 0, 0        | 0,4,46        | 5,70,315        | 2,48,240        | 45,871,3894     | 145,1662,5633   |
| ALS2        | missense, splice region   | *ENST00000264276                         | c.1115C>G                        | p.Pro372Arg                    | 0           | 1           | 50,0,0        | 389,1,0         | 294,2,0         | 4742,22,0       | 7306,23,0       |
| <b>ALS2</b> | <b>missense</b>           | <b>*ENST00000264276</b>                  | <b>c.1226C&gt;G</b>              | <b>p.Ala409Gly</b>             | <b>0</b>    | <b>0</b>    | <b>48,0,0</b> | <b>358,12,0</b> | <b>252,23,0</b> | <b>252,23,0</b> | <b>252,23,0</b> |
| ALS2        | missense                  | *ENST00000264276                         | c.1265T>C                        | p.Met422Thr                    | 1           | 0           | 50,0,0        | 388,1,0         | 302,0,0         | 4454,1,0        | 6399,1,0        |
| <b>ALS2</b> | <b>missense</b>           | <b>*ENST00000264276</b>                  | <b>c.1283C&gt;A</b>              | <b>p.Thr428Asn</b>             | <b>0</b>    | <b>0</b>    | <b>50,0,0</b> | <b>388,1,0</b>  | <b>302,0,0</b>  | <b>302,0,0</b>  | <b>302,0,0</b>  |
| ALS2        | missense                  | *ENST00000264276                         | c.1627G>A                        | p.Asp543Asn                    | 1           | 2           | 47,0,0        | 290,0,0         | 247,4,0         | 4389,11,0       | 6357,11,0       |
| ALS2        | splice region, synonymous | *ENST00000264276                         | c.1641G>A                        | p.(=)                          |             |             | 50,0,0        | 380,1,0         | 277,0,0         | 4388,4,0        | 6255,9,0        |
| ALS2        | synonymous                | *ENST00000264276                         | c.2028A>G                        | p.(=)                          |             |             | 50,0,0        | 383,0,0         | 267,1,0         | 267,1,0         | 267,1,0         |
| ALS2        | missense                  | *ENST00000264276, ENST00000457679        | c.2098A>G, c.34A>G               | p.Thr700Ala, p.Thr12Ala        | 0, 0        | 0, 0        | 50,0,0        | 384,2,0         | 279,0,0         | 279,0,0         | 279,0,0         |
| ALS2        | missense                  | *ENST00000264276, ENST00000457679        | c.2155C>T, c.91C>T               | p.Pro719Ser, p.Pro31Ser        | 1, 1        | 2, 2        | 50,0,0        | 389,0,0         | 282,1,0         | 282,1,0         | 282,1,0         |
| <b>ALS2</b> | <b>missense</b>           | <b>*ENST00000264276, ENST00000457679</b> | <b>c.2216C&gt;T, c.152C&gt;T</b> | <b>p.Ala739Val, p.Ala51Val</b> | <b>0, 0</b> | <b>0, 0</b> | <b>46,2,0</b> | <b>304,52,0</b> | <b>210,54,0</b> | <b>210,54,0</b> | <b>210,54,0</b> |
| ALS2        | synonymous                | *ENST00000264276, ENST00000457679        | c.2241C>T, c.177C>T              | p.(=), p.(=)                   | ,           | ,           | 50,0,0        | 388,1,0         | 295,1,0         | 4445,25,0       | 6403,28,0       |
| ALS2        | missense                  | *ENST00000264276, ENST00000457679        | c.2408A>G, c.344A>G              | p.Lys803Arg, p.Lys115Arg       | 0, 0        | 1, 0        | 50,0,0        | 390,1,0         | 289,0,0         | 289,0,0         | 289,0,0         |
| ALS2        | synonymous                | *ENST00000264276, ENST00000457679        | c.2466G>A, c.402G>A              | p.(=), p.(=)                   | ,           | ,           | 8,25,15       | 57,175,145      | 37,117,102      | 750,2244,1719   | 2360,2984,1894  |
| ALS2        | missense                  | *ENST00000264276, ENST00000457679        | c.2566A>G, c.502A>G              | p.Thr856Ala, p.Thr168Ala       | 0, 0        | 1, 0        | 47,0,0        | 372,1,0         | 253,0,0         | 253,0,0         | 253,0,0         |
| ALS2        | missense                  | *ENST00000264276, ENST00000457679        | c.2606A>C, c.542A>C              | p.Gln869Pro, p.Gln181Pro       | 1, 0        | 2, 1        | 50,0,0        | 389,1,0         | 290,0,0         | 290,0,0         | 290,0,0         |
| ALS2        | synonymous                | *ENST00000264276, ENST00000457679        | c.2796C>T, c.732C>T              | p.(=), p.(=)                   | ,           | ,           | 34,15,1       | 308,75,4        | 241,54,2        | 4029,745,31     | 6262,1120,53    |
| ALS2        | missense                  | *ENST00000264276, ENST00000467448,       | c.280A>G, c.280A>G,              | p.Ile94Val, p.Ile94Val,        | 0, 0, 0, 0  | 0, 0, 0, 0  | 47,3,0        | 371,15,1        | 285,14,0        | 4596,232,4      | 7069,445,7      |

|             |                                    |                                              |                                                     |                                       |             |             |               |                 |                 |                 |                 |                 |
|-------------|------------------------------------|----------------------------------------------|-----------------------------------------------------|---------------------------------------|-------------|-------------|---------------|-----------------|-----------------|-----------------|-----------------|-----------------|
|             |                                    | ENST00000409632,<br>ENST00000410052          | c.280A>G,<br>c.280A>G                               | p.Ile94Val,<br>p.Ile94Val             |             |             |               |                 |                 |                 |                 |                 |
| <b>ALS2</b> | <b>synonymous</b>                  | <b>*ENST00000264276,<br/>ENST00000457679</b> | <b>c.2992C&gt;A,<br/>c.928C&gt;A</b>                | <b>p.(=), p.(=)</b>                   | <b>,</b>    | <b>,</b>    | <b>48,0,0</b> | <b>352,1,0</b>  | <b>268,2,0</b>  | <b>268,2,0</b>  | <b>268,2,0</b>  | <b>268,2,0</b>  |
| ALS2        | missense                           | *ENST00000264276,<br>ENST00000457679         | c.3046C>G,<br>c.982C>G                              | p.Pro1016Ala<br>, p.Pro328Ala         | 0, 0        | 0, 0        | 50,0,0        | 386,1,0         | 291,0,0         | 4445,1,0        | 6365,17,0       |                 |
| ALS2        | missense                           | *ENST00000264276,<br>ENST00000457679         | c.3094C>T,<br>c.1030C>T                             | p.Arg1032Cys<br>, p.Arg344Cys         | 1, 1        | 2, 2        | 49,0,0        | 374,1,0         | 274,0,0         | 274,0,0         | 274,0,0         |                 |
| ALS2        | synonymous                         | *ENST00000264276,<br>ENST00000457679         | c.3129C>G,<br>c.1065C>G                             | p.(=), p.(=)                          | ,           | ,           | 50,0,0        | 387,1,0         | 294,0,0         | 294,0,0         | 294,0,0         |                 |
| <b>ALS2</b> | <b>splice donor</b>                | <b>*ENST00000264276,<br/>ENST00000457679</b> | <b>c.3182+2T<br/>&gt;G,<br/>c.1118+2T<br/>&gt;G</b> | <b>,</b>                              | <b>,</b>    | <b>,</b>    | <b>46,0,0</b> | <b>361,3,0</b>  | <b>254,6,0</b>  | <b>254,6,0</b>  | <b>254,6,0</b>  | <b>254,6,0</b>  |
| <b>ALS2</b> | <b>missense,<br/>splice region</b> | <b>*ENST00000264276,<br/>ENST00000457679</b> | <b>c.3250T&gt;G,<br/>c.1186T&gt;G</b>               | <b>p.Tyr1084Asp<br/>, p.Tyr396Asp</b> | <b>1, 1</b> | <b>1, 1</b> | <b>40,3,0</b> | <b>280,20,0</b> | <b>187,18,0</b> | <b>187,18,0</b> | <b>187,18,0</b> | <b>187,18,0</b> |
| ALS2        | missense                           | *ENST00000264276,<br>ENST00000457679         | c.3307C>A,<br>c.1243C>A                             | p.His1103Asn<br>, p.His415Asn         | 0, 1        | 0, 0        | 49,0,0        | 384,0,0         | 277,1,0         | 277,1,0         | 277,1,0         |                 |
| ALS2        | synonymous                         | *ENST00000264276                             | c.3741T>G                                           | p.(=)                                 |             |             | 50,0,0        | 385,1,0         | 282,0,0         | 4728,20,0       | 7267,20,0       |                 |
| ALS2        | missense                           | *ENST00000264276                             | c.3863C>T                                           | p.Pro1288Leu                          | 0           | 0           | 50,0,0        | 375,1,0         | 302,0,0         | 4403,3,0        | 6299,3,0        |                 |
| ALS2        | synonymous                         | *ENST00000264276                             | c.3885G>A                                           | p.(=)                                 |             |             | 45,3,0        | 349,14,0        | 266,15,1        | 4404,366,7      | 6998,399,7      |                 |
| ALS2        | synonymous                         | *ENST00000264276                             | c.4015C>T                                           | p.(=)                                 |             |             | 0,3,44        | 1,57,288        | 0,25,218        | 25,682,3997     | 83,1354,5829    |                 |
| ALS2        | synonymous                         | *ENST00000264276                             | c.4107G>A                                           | p.(=)                                 |             |             | 46,0,0        | 352,1,0         | 245,0,0         | 245,0,0         | 245,0,0         |                 |
| ALS2        | missense                           | *ENST00000264276                             | c.4119A>G                                           | p.Ile1373Met                          | 1           | 0           | 46,0,0        | 342,2,0         | 243,0,0         | 4664,43,0       | 7189,47,0       |                 |
| ALS2        | missense                           | *ENST00000264276                             | c.4135C>A                                           | p.Pro1379Thr                          | 1           | 1           | 50,0,0        | 386,0,0         | 296,2,0         | 296,2,0         | 296,2,0         |                 |
| ALS2        | missense                           | *ENST00000264276                             | c.4382G>A                                           | p.Arg1461Gln                          | 0           | 0           | 50,0,0        | 384,1,0         | 282,1,0         | 282,1,0         | 282,1,0         |                 |
| ALS2        | synonymous                         | *ENST00000264276                             | c.4641G>A                                           | p.(=)                                 |             |             | 49,0,0        | 387,1,0         | 277,2,0         | 277,2,0         | 277,2,0         |                 |
| ALS2        | missense                           | *ENST00000264276                             | c.4957C>T                                           | p.Arg1653Cys                          | 1           | 1           | 50,0,0        | 356,0,0         | 239,1,0         | 4337,2,0        | 6197,3,0        |                 |
| ANG         | missense                           | *ENST00000336811,<br>ENST00000397990         | c.122A>T,<br>c.122A>T                               | p.Lys41Ile,<br>p.Lys41Ile             | 1, 1        | 0, 0        | 50,0,0        | 361,5,0         | 283,5,0         | 4938,28,0       | 7850,32,0       |                 |
| ANG         | missense                           | *ENST00000336811,<br>ENST00000397990         | c.208A>G,<br>c.208A>G                               | p.Ile70Val,<br>p.Ile70Val             | 0, 0        | 0, 0        | 50,0,0        | 387,1,0         | 301,2,0         | 4596,7,0        | 6797,9,0        |                 |
| ANG         | synonymous                         | *ENST00000336811,<br>ENST00000397990         | c.330T>G,<br>c.330T>G                               | p.(=), p.(=)                          | ,           | ,           | 32,15,3       | 304,76,7        | 220,76,10       | 3725,1169,90    | 5982,1771,147   |                 |
| ANG         | synonymous                         | *ENST00000336811,                            | c.363A>T,                                           | p.(=), p.(=)                          | ,           | ,           | 50,0,0        | 388,0,0         | 305,1,0         | 4978,6,0        | 7669,223,8      |                 |

|              |                                           |                                                                                                                                                              |                                                                                                        |                                                                                                           |                              |                              |              |              |              |                   |                    |  |
|--------------|-------------------------------------------|--------------------------------------------------------------------------------------------------------------------------------------------------------------|--------------------------------------------------------------------------------------------------------|-----------------------------------------------------------------------------------------------------------|------------------------------|------------------------------|--------------|--------------|--------------|-------------------|--------------------|--|
|              |                                           | ENST00000397990                                                                                                                                              | c.363A>T                                                                                               |                                                                                                           |                              |                              |              |              |              |                   |                    |  |
| ATXN2        | missense                                  | *ENST00000377617,<br>ENST00000535949,<br>ENST00000550104,<br>ENST00000542287,<br>ENST00000471866,<br>ENST00000389153,<br>ENST00000548492                     | c.1123G>A,<br>c.256G>A,<br>c.1123G>A,<br>c.328G>A,<br>c.151G>A,<br>c.328G>A,<br>c.352G>A               | p.Asp375Asn,<br>p.Asp86Asn,<br>p.Asp375Asn,<br>p.Asp110Asn,<br>p.Asp51Asn,<br>p.Asp110Asn,<br>p.Asp118Asn | 1, 1,<br>1, 1,<br>1, 1,<br>1 | 0, 0,<br>0, 0,<br>0, 0,<br>0 | 37,0,0       | 210,0,0      | 158,1,0      | 158,1,0           | 158,1,0            |  |
| ATXN2        | missense                                  | *ENST00000377617,<br>ENST00000535949,<br>ENST00000550104,<br>ENST00000542287,<br>ENST00000389153                                                             | c.1472A>G,<br>c.605A>G,<br>c.1472A>G,<br>c.677A>G,<br>c.677A>G                                         | p.Asn491Ser,<br>p.Asn202Ser,<br>p.Asn491Ser,<br>p.Asn226Ser,<br>p.Asn226Ser                               | 0, 0,<br>0, 0,<br>0          | 0, 0,<br>0, 0,<br>0          | 36,1,0       | 206,4,0      | 163,0,0      | 4821,20,0         | 7733,24,0          |  |
| ATXN2        | missense,<br>splice region,<br>synonymous | *ENST00000377617,<br>ENST00000542287,<br>ENST00000550104,<br>ENST00000389153,<br>ENST00000389154,<br>ENST00000535949,<br>ENST00000482777                     | c.3000A>G,<br>c.2205A>G,<br>c.2939A>G,<br>c.2211A>G,<br>c.165A>G,<br>c.2133A>G,<br>c.57A>G             | p.(=), p.(=),<br>p.Tyr980Cys,<br>p.(=), p.(=),<br>p.(=), p.(=)                                            | ,, 0,<br>,, ,                | ,, 0,<br>,, ,                | 37,0,0       | 208,2,0      | 164,1,0      | 4803,40,0         | 7712,47,0          |  |
| <b>ATXN2</b> | <b>missense</b>                           | <b>*ENST00000377617,<br/>ENST00000550104</b>                                                                                                                 | <b>c.319C&gt;G,<br/>c.319C&gt;G</b>                                                                    | <b>p.Leu107Val,<br/>p.Leu107Val</b>                                                                       | <b>0, 0</b>                  | <b>,</b>                     | <b>0,0,0</b> | <b>0,0,0</b> | <b>0,0,0</b> | <b>19,122,237</b> | <b>416,351,324</b> |  |
| ATXN2        | missense                                  | *ENST00000377617,<br>ENST00000550844,<br>ENST00000389154,<br>ENST00000542287,<br>ENST00000389153                                                             | c.3322C>T,<br>c.97C>T,<br>c.487C>T,<br>c.2527C>T,<br>c.2533C>T                                         | p.Pro1108Ser<br>, p.Pro33Ser,<br>p.Pro163Ser,<br>p.Pro843Ser,<br>p.Pro845Ser                              | 0, 0,<br>0, 0,<br>0          | 2, 2,<br>1, 2,<br>2          | 37,0,0       | 200,1,0      | 147,3,0      | 4811,17,0         | 7724,20,0          |  |
| ATXN2        | missense,<br>synonymous                   | *ENST00000377617,<br>ENST00000535949,<br>ENST00000550844,<br>ENST00000542287,<br>ENST00000389154,<br>ENST00000389153,<br>ENST00000482777,<br>ENST00000550889 | c.3411C>T,<br>c.2490C>T,<br>c.186C>T,<br>c.2616C>T,<br>c.576C>T,<br>c.2622C>T,<br>c.414C>T,<br>c.65C>T | p.(=), p.(=),<br>p.(=), p.(=),<br>p.(=), p.(=),<br>p.(=),<br>p.Thr22Met                                   | ,, , ,<br>,, ,               | ,, , ,<br>,, ,               | 37,0,0       | 209,1,0      | 165,0,0      | 165,0,0           | 165,0,0            |  |

|            |            |                                                                                                                                                              |                                                                                                         |                                                                                                                             |                                |                                |         |           |           |               |               |
|------------|------------|--------------------------------------------------------------------------------------------------------------------------------------------------------------|---------------------------------------------------------------------------------------------------------|-----------------------------------------------------------------------------------------------------------------------------|--------------------------------|--------------------------------|---------|-----------|-----------|---------------|---------------|
| ATXN2      | missense   | *ENST00000377617,<br>ENST00000550844,<br>ENST00000389154,<br>ENST00000482777,<br>ENST00000550889,<br>ENST00000389153,<br>ENST00000535949,<br>ENST00000542287 | c.3491G>A,<br>c.266G>A,<br>c.656G>A,<br>c.494G>A,<br>c.145G>A,<br>c.2702G>A,<br>c.2570G>A,<br>c.2696G>A | p.Ser1164Asn<br>, p.Ser89Asn,<br>p.Ser219Asn,<br>p.Ser165Asn,<br>p.Val49Ile,<br>p.Ser901Asn,<br>p.Ser857Asn,<br>p.Ser899Asn | 0, 0,<br>0, 0,<br>, 0,<br>0, 0 | 0, 0,<br>0, 0,<br>, 0,<br>0, 0 | 36,1,0  | 210,0,0   | 165,0,0   | 4464,1,0      | 6667,1,0      |
| ATXN2      | synonymous | *ENST00000377617,<br>ENST00000389154,<br>ENST00000550844,<br>ENST00000542287,<br>ENST00000389153,<br>ENST00000535949,<br>ENST00000482777                     | c.3708G>A,<br>c.873G>A,<br>c.483G>A,<br>c.2913G>A,<br>c.2919G>A,<br>c.2787G>A,<br>c.711G>A              | p.(=), p.(=),<br>p.(=), p.(=),<br>p.(=), p.(=),<br>p.(=)                                                                    | , , , ,<br>, ,                 | , , , ,<br>, ,                 | 37,0,0  | 207,3,0   | 165,0,0   | 4805,38,0     | 7714,45,0     |
| ATXN2      | missense   | *ENST00000377617,<br>ENST00000550104                                                                                                                         | c.743G>A,<br>c.743G>A                                                                                   | p.Ser248Asn,<br>p.Ser248Asn                                                                                                 | 0, 0                           | 1, 0                           | 36,0,0  | 197,3,0   | 145,4,0   | 4790,37,0     | 6858,776,108  |
| C9orf72    | synonymous | *ENST00000380003                                                                                                                                             | c.1275G>A                                                                                               | p.(=)                                                                                                                       |                                |                                | 48,0,0  | 362,0,0   | 252,1,0   | 4552,1,0      | 6752,2,0      |
| C9orf72    | synonymous | *ENST00000380003                                                                                                                                             | c.1404C>T                                                                                               | p.(=)                                                                                                                       |                                |                                | 49,1,0  | 383,3,0   | 270,6,0   | 4898,56,0     | 7809,61,0     |
| C9orf72    | missense   | *ENST00000380003,<br>ENST00000379995,<br>ENST00000379997                                                                                                     | c.620A>G,<br>c.620A>G,<br>c.620A>G                                                                      | p.Asn207Ser,<br>p.Asn207Ser,<br>p.Asn207Ser                                                                                 | 0, 0,<br>0                     | 0, 0,<br>0                     | 38,9,1  | 301,69,6  | 194,47,5  | 3788,1048,87  | 6523,1227,89  |
| C9orf72    | synonymous | *ENST00000380003                                                                                                                                             | c.870C>T                                                                                                | p.(=)                                                                                                                       |                                |                                | 35,12,3 | 275,95,16 | 193,84,11 | 3232,1534,200 | 5090,2459,333 |
| CHMP2<br>B | missense   | *ENST00000263780,<br>ENST00000494980                                                                                                                         | c.118A>G,<br>c.118A>G                                                                                   | p.Lys40Glu,<br>p.Lys40Glu                                                                                                   | 1, 1                           | 1, 0                           | 50,0,0  | 372,1,0   | 261,0,0   | 261,0,0       | 261,0,0       |
| CHMP2<br>B | missense   | *ENST00000263780,<br>ENST00000494980                                                                                                                         | c.123G>T,<br>c.123G>T                                                                                   | p.Gln41His,<br>p.Gln41His                                                                                                   | 1, 1                           | 1, 2                           | 50,0,0  | 372,1,0   | 263,0,0   | 263,0,0       | 263,0,0       |
| CHMP2<br>B | synonymous | *ENST00000263780,<br>ENST00000494980                                                                                                                         | c.27C>T,<br>c.27C>T                                                                                     | p.(=), p.(=)                                                                                                                | ,                              | ,                              | 24,4,0  | 135,42,3  | 104,26,1  | 4016,752,41   | 6298,1343,84  |
| CHMP2<br>B | synonymous | *ENST00000263780,<br>ENST00000471660                                                                                                                         | c.312T>C,<br>c.189T>C                                                                                   | p.(=), p.(=)                                                                                                                | ,                              | ,                              | 0,3,43  | 1,23,336  | 0,26,214  | 16,506,4396   | 467,1777,5590 |
| CHMP2<br>B | synonymous | *ENST00000263780,<br>ENST00000471660,<br>ENST00000494980                                                                                                     | c.372A>C,<br>c.249A>C,<br>c.282A>C                                                                      | p.(=), p.(=),<br>p.(=)                                                                                                      | , ,                            | , ,                            | 33,8,1  | 248,53,4  | 176,36,0  | 4084,760,38   | 6382,1338,78  |
| DCTN1      | synonymous | *ENST00000361874,                                                                                                                                            | c.1059C>T,                                                                                              | p.(=), p.(=),                                                                                                               | , , , ,                        | , , , ,                        | 46,0,0  | 274,1,0   | 211,1,0   | 211,1,0       | 211,1,0       |

|       |          |                                                                                                                                          |                                                                                                                       |                                                                                                             |                              |                              |        |         |         |            |            |  |
|-------|----------|------------------------------------------------------------------------------------------------------------------------------------------|-----------------------------------------------------------------------------------------------------------------------|-------------------------------------------------------------------------------------------------------------|------------------------------|------------------------------|--------|---------|---------|------------|------------|--|
|       |          | ENST00000394003,<br>ENST00000409438,<br>ENST00000409567,<br>ENST00000409868,<br>ENST00000407639,<br>ENST00000409240                      | c.1038C>T,<br>c.657C>T,<br>c.999C>T,<br>c.1008C>T,<br>c.657C>T,<br>c.948C>T                                           | p.(=), p.(=),<br>p.(=), p.(=),<br>p.(=)                                                                     | , ,                          | , ,                          |        |         |         |            |            |  |
| DCTN1 | missense | *ENST00000361874,<br>ENST00000409567,<br>ENST00000407639,<br>ENST00000409438,<br>ENST00000409240,<br>ENST00000394003,<br>ENST00000409868 | c.1060G>A,<br>c.1000G>A,<br>c.658G>A,<br>c.658G>A,<br>c.949G>A,<br>c.1039G>A,<br>c.1009G>A                            | p.Ala354Thr,<br>p.Ala334Thr,<br>p.Ala220Thr,<br>p.Ala220Thr,<br>p.Ala317Thr,<br>p.Ala347Thr,<br>p.Ala337Thr | 1, 1,<br>1, 1,<br>1, 1,<br>1 | 2, 2,<br>2, 2,<br>2, 2,<br>2 | 45,1,0 | 272,1,0 | 194,1,0 | 194,1,0    | 194,1,0    |  |
| DCTN1 | missense | *ENST00000361874,<br>ENST00000409438,<br>ENST00000394003,<br>ENST00000407639,<br>ENST00000409567,<br>ENST00000409240,<br>ENST00000409868 | c.1231C>A,<br>c.829C>A,<br>c.1210C>A,<br>c.829C>A,<br>c.1171C>A,<br>c.1120C>A,<br>c.1180C>A                           | p.Arg411Ser,<br>p.Arg277Ser,<br>p.Arg404Ser,<br>p.Arg277Ser,<br>p.Arg391Ser,<br>p.Arg374Ser,<br>p.Arg394Ser | 0, 0,<br>0, 0,<br>0, 0,<br>0 | 0, 0,<br>0, 0,<br>0, 0,<br>0 | 41,0,0 | 246,2,0 | 167,0,0 | 167,0,0    | 167,0,0    |  |
| DCTN1 | missense | *ENST00000361874,<br>ENST00000409868,<br>ENST00000409567,<br>ENST00000409240,<br>ENST00000394003,<br>ENST00000409438,<br>ENST00000407639 | c.1480G>A<br>,<br>c.1429G>A<br>,<br>c.1420G>A<br>,<br>c.1369G>A<br>,<br>c.1459G>A<br>,<br>c.1078G>A<br>,<br>c.1078G>A | p.Ala494Thr,<br>p.Ala477Thr,<br>p.Ala474Thr,<br>p.Ala457Thr,<br>p.Ala487Thr,<br>p.Ala360Thr,<br>p.Ala360Thr | 0, 0,<br>0, 0,<br>0, 0,<br>0 | 2, 2,<br>0, 1,<br>0, 0,<br>0 | 37,0,0 | 203,1,0 | 178,1,0 | 4478,1,0   | 6676,6,0   |  |
| DCTN1 | missense | *ENST00000361874,<br>ENST00000409868,                                                                                                    | c.1484G>A,<br>c.1433G>A,                                                                                              | p.Arg495Gln,<br>p.Arg478Gln,                                                                                | 0, 0,<br>0, 0,               | 0, 0,<br>0, 0,               | 34,7,0 | 202,9,1 | 183,5,0 | 4687,178,1 | 7578,203,1 |  |



|              |                 |                                                                                                                                                       |                                                                                                                                 |                                                                                                                          |                                        |                                        |               |                |                |                |                |
|--------------|-----------------|-------------------------------------------------------------------------------------------------------------------------------------------------------|---------------------------------------------------------------------------------------------------------------------------------|--------------------------------------------------------------------------------------------------------------------------|----------------------------------------|----------------------------------------|---------------|----------------|----------------|----------------|----------------|
|              |                 | ENST00000409567,<br>ENST00000394003,<br>ENST00000409240,<br>ENST00000407639,<br>ENST00000409438                                                       | c.1424G>A,<br>c.1463G>A,<br>c.1373G>A,<br>c.1082G>A,<br>c.1082G>A                                                               | p.Arg475Gln,<br>p.Arg488Gln,<br>p.Arg458Gln,<br>p.Arg361Gln,<br>p.Arg361Gln                                              | 0, 0,<br>0                             | 0, 0,<br>0                             |               |                |                |                |                |
| DCTN1        | synonymous      | *ENST00000361874,<br>ENST00000394003,<br>ENST00000409868,<br>ENST00000409567,<br>ENST00000407639,<br>ENST00000409240,<br>ENST00000409438              | c.2019C>T,<br>c.1998C>T,<br>c.1968C>T,<br>c.1959C>T,<br>c.1617C>T,<br>c.1908C>T,<br>c.1617C>T                                   | p.(=), p.(=),<br>p.(=), p.(=),<br>p.(=), p.(=),<br>p.(=)                                                                 | ,, ,,<br>,,                            | ,, ,,<br>,,                            | 49,0,0        | 380,0,0        | 300,1,0        | 300,1,0        | 300,1,0        |
| <b>DCTN1</b> | <b>missense</b> | <b>*ENST00000361874,<br/>ENST00000409567,<br/>ENST00000409240,<br/>ENST00000407639,<br/>ENST00000409438,<br/>ENST00000409868,<br/>ENST00000394003</b> | <b>c.2209G&gt;C,<br/>c.2149G&gt;C,<br/>c.2098G&gt;C,<br/>c.1807G&gt;C,<br/>c.1807G&gt;C,<br/>c.2158G&gt;C,<br/>c.2188G&gt;C</b> | <b>p.Glu737Gln,<br/>p.Glu717Gln,<br/>p.Glu700Gln,<br/>p.Glu603Gln,<br/>p.Glu603Gln,<br/>p.Glu720Gln,<br/>p.Glu730Gln</b> | <b>1, 1,<br/>1, 1,<br/>1, 1,<br/>1</b> | <b>1, 0,<br/>1, 0,<br/>0, 1,<br/>0</b> | <b>49,0,0</b> | <b>360,1,0</b> | <b>289,1,0</b> | <b>289,1,0</b> | <b>289,1,0</b> |
| DCTN1        | missense        | *ENST00000361874,<br>ENST00000407639,<br>ENST00000409438,<br>ENST00000409868,<br>ENST00000409567,<br>ENST00000394003,<br>ENST00000409240              | c.2339T>C,<br>c.1937T>C,<br>c.1937T>C,<br>c.2288T>C,<br>c.2279T>C,<br>c.2318T>C,<br>c.2228T>C                                   | p.Ile780Thr,<br>p.Ile646Thr,<br>p.Ile646Thr,<br>p.Ile763Thr,<br>p.Ile760Thr,<br>p.Ile773Thr,<br>p.Ile743Thr              | 1, 1,<br>1, 1,<br>1, 1,<br>1           | 0, 0,<br>0, 0,<br>0, 0,<br>0           | 50,0,0        | 384,1,0        | 304,0,0        | 4603,1,0       | 6806,1,0       |
| DCTN1        | missense        | *ENST00000361874,<br>ENST00000409438,<br>ENST00000407639,<br>ENST00000394003,<br>ENST00000409240,<br>ENST00000409868,<br>ENST00000409567              | c.2353C>T,<br>c.1951C>T,<br>c.1951C>T,<br>c.2332C>T,<br>c.2242C>T,<br>c.2302C>T,<br>c.2293C>T                                   | p.Arg785Trp,<br>p.Arg651Trp,<br>p.Arg651Trp,<br>p.Arg778Trp,<br>p.Arg748Trp,<br>p.Arg768Trp,<br>p.Arg765Trp              | 1, 1,<br>1, 1,<br>1, 1,<br>1           | 2, 2,<br>2, 2,<br>2, 2,<br>2           | 50,0,0        | 377,1,0        | 301,0,0        | 4594,7,0       | 6795,9,0       |
| DCTN1        | synonymous      | *ENST00000361874,<br>ENST00000409438,                                                                                                                 | c.2448A>G,<br>c.2046A>G,                                                                                                        | p.(=), p.(=),<br>p.(=), p.(=),                                                                                           | ,, ,,<br>,,                            | ,, ,,<br>,,                            | 48,0,0        | 369,4,0        | 301,2,0        | 4907,74,0      | 7613,281,3     |

|       |                 |                                                                                                                                          |                                                                                                             |                                                                                                             |                                       |                              |        |         |         |          |          |  |
|-------|-----------------|------------------------------------------------------------------------------------------------------------------------------------------|-------------------------------------------------------------------------------------------------------------|-------------------------------------------------------------------------------------------------------------|---------------------------------------|------------------------------|--------|---------|---------|----------|----------|--|
|       |                 | ENST00000409868,<br>ENST00000407639,<br>ENST00000409240,<br>ENST00000394003,<br>ENST00000409567                                          | c.2397A>G,<br>c.2046A>G,<br>c.2337A>G,<br>c.2427A>G,<br>c.2388A>G                                           | p.(=), p.(=),<br>p.(=)                                                                                      |                                       |                              |        |         |         |          |          |  |
| DCTN1 | missense        | *ENST00000361874,<br>ENST00000409438,<br>ENST00000407639,<br>ENST00000409240,<br>ENST00000394003,<br>ENST00000409868,<br>ENST00000409567 | c.2551C>G,<br>c.2149C>G,<br>c.2149C>G,<br>c.2440C>G,<br>c.2530C>G,<br>c.2500C>G,<br>c.2491C>G               | p.Leu851Val,<br>p.Leu717Val,<br>p.Leu717Val,<br>p.Leu814Val,<br>p.Leu844Val,<br>p.Leu834Val,<br>p.Leu831Val | 0, 0,<br>0, 0,<br>0, 0,<br>0, 0,<br>0 | 0, 0,<br>0, 0,<br>0, 0,<br>0 | 27,0,0 | 212,0,0 | 222,1,0 | 600,1,0  | 1312,2,0 |  |
| DCTN1 | synonymous      | *ENST00000361874,<br>ENST00000409240,<br>ENST00000407639,<br>ENST00000409567,<br>ENST00000409868,<br>ENST00000394003,<br>ENST00000409438 | c.2559C>T,<br>c.2448C>T,<br>c.2157C>T,<br>c.2499C>T,<br>c.2508C>T,<br>c.2538C>T,<br>c.2157C>T               | p.(=), p.(=),<br>p.(=), p.(=),<br>p.(=), p.(=),<br>p.(=)                                                    | ''''<br>''                            | ''''<br>''                   | 30,0,0 | 222,1,0 | 216,1,0 | 216,1,0  | 216,1,0  |  |
| DCTN1 | splice acceptor | *ENST00000361874,<br>ENST00000409868,<br>ENST00000409567,<br>ENST00000394003,<br>ENST00000409438,<br>ENST00000407639,<br>ENST00000409240 | c.2887-2A>G,<br>c.2836-2A>G,<br>c.2827-2A>G,<br>c.2866-2A>G,<br>c.2485-2A>G,<br>c.2485-2A>G,<br>c.2776-2A>G | ''''''                                                                                                      | ''''<br>''                            | ''''<br>''                   | 39,0,0 | 237,2,0 | 246,0,0 | 246,0,0  | 246,0,0  |  |
| DCTN1 | synonymous      | *ENST00000361874,<br>ENST00000409567,                                                                                                    | c.2952C>G,<br>c.2892C>G,                                                                                    | p.(=), p.(=),<br>p.(=), p.(=),                                                                              | ''''<br>''                            | ''''<br>''                   | 46,0,0 | 287,0,0 | 280,1,0 | 4579,2,0 | 6782,2,0 |  |

|              |                 |                                                                                                                                          |                                                                                               |                                                                                                                                  |                                        |                                        |               |                 |                 |                 |                 |  |
|--------------|-----------------|------------------------------------------------------------------------------------------------------------------------------------------|-----------------------------------------------------------------------------------------------|----------------------------------------------------------------------------------------------------------------------------------|----------------------------------------|----------------------------------------|---------------|-----------------|-----------------|-----------------|-----------------|--|
|              |                 | ENST00000409868,<br>ENST00000409240,<br>ENST00000409438,<br>ENST00000407639,<br>ENST00000394003                                          | c.2901C>G,<br>c.2841C>G,<br>c.2550C>G,<br>c.2550C>G,<br>c.2931C>G                             | p.(=), p.(=),<br>p.(=)                                                                                                           |                                        |                                        |               |                 |                 |                 |                 |  |
| DCTN1        | missense        | *ENST00000361874,<br>ENST00000409438,<br>ENST00000394003,<br>ENST00000409240,<br>ENST00000407639,<br>ENST00000409868,<br>ENST00000409567 | c.3146G>A,<br>c.2744G>A,<br>c.3125G>A,<br>c.3035G>A,<br>c.2744G>A,<br>c.3095G>A,<br>c.3086G>A | p.Arg1049Gln<br>,<br>p.Arg915Gln,<br>p.Arg1042Gln<br>,<br>p.Arg1012Gln<br>,<br>p.Arg915Gln,<br>p.Arg1032Gln<br>,<br>p.Arg1029Gln | 0, 0,<br>0, 0,<br>0, 0,<br>0           | 2, 2,<br>2, 2,<br>2, 2,<br>2           | 47,0,0        | 313,4,0         | 273,2,0         | 4930,23,0       | 7845,24,0       |  |
| DCTN1        | synonymous      | *ENST00000361874,<br>ENST00000409868,<br>ENST00000409567,<br>ENST00000409438,<br>ENST00000407639,<br>ENST00000394003,<br>ENST00000409240 | c.3501C>T,<br>c.3435C>T,<br>c.3426C>T,<br>c.3084C>T,<br>c.3099C>T,<br>c.3480C>T,<br>c.3375C>T | p.(=), p.(=),<br>p.(=), p.(=),<br>p.(=), p.(=),<br>p.(=)                                                                         | ''''<br>''                             | ''''<br>''                             | 45,0,0        | 299,2,0         | 224,3,0         | 224,3,0         | 224,3,0         |  |
| DCTN1        | missense        | *ENST00000361874,<br>ENST00000407639,<br>ENST00000409240,<br>ENST00000394003,<br>ENST00000409438,<br>ENST00000409868,<br>ENST00000409567 | c.3746C>T,<br>c.3344C>T,<br>c.3620C>T,<br>c.3725C>T,<br>c.3329C>T,<br>c.3680C>T,<br>c.3671C>T | p.Thr1249Ile,<br>p.Thr1115Ile,<br>p.Thr1207Ile,<br>p.Thr1242Ile,<br>p.Thr1110Ile,<br>p.Thr1227Ile,<br>p.Thr1224Ile               | 1, 1,<br>1, 1,<br>1, 1,<br>1           | 0, 0,<br>0, 0,<br>0, 0,<br>0           | 41,0,0        | 272,3,0         | 266,4,0         | 4905,43,0       | 7816,48,0       |  |
| <b>DCTN1</b> | <b>missense</b> | <b>*ENST00000361874,<br/>ENST00000409438,<br/>ENST00000407639,<br/>ENST00000409868,<br/>ENST00000394003,</b>                             | <b>c.3788T&gt;G,<br/>c.3371T&gt;G,<br/>c.3386T&gt;G,<br/>c.3722T&gt;G,<br/>c.3767T&gt;G,</b>  | <b>p.Val1263Gly<br/>,<br/>p.Val1124Gly<br/>,<br/>p.Val1129Gly</b>                                                                | <b>1, 1,<br/>1, 1,<br/>1, 1,<br/>1</b> | <b>2, 1,<br/>1, 2,<br/>1, 1,<br/>2</b> | <b>32,3,0</b> | <b>135,52,0</b> | <b>114,52,0</b> | <b>114,52,0</b> | <b>114,52,0</b> |  |

|       |            |                                                                                                                                          |                                                                                                                          |                                                                                                                          |                                        |                                        |               |                |                |                |                |
|-------|------------|------------------------------------------------------------------------------------------------------------------------------------------|--------------------------------------------------------------------------------------------------------------------------|--------------------------------------------------------------------------------------------------------------------------|----------------------------------------|----------------------------------------|---------------|----------------|----------------|----------------|----------------|
|       |            | <b>ENST00000409567,<br/>ENST00000409240</b>                                                                                              | <b>c.3713T&gt;G,<br/>c.3662T&gt;G</b>                                                                                    | <b>,<br/>p.Val1241Gly<br/>,<br/>p.Val1256Gly<br/>,<br/>p.Val1238Gly<br/>,<br/>p.Val1221Gly</b>                           |                                        |                                        |               |                |                |                |                |
| DCTN1 | synonymous | *ENST00000361874,<br>ENST00000394003,<br>ENST00000409567,<br>ENST00000458655,<br>ENST00000417090                                         | c.42C>T,<br>c.42C>T,<br>c.42C>T,<br>c.63C>T,<br>c.54C>T                                                                  | p.(=), p.(=),<br>p.(=), p.(=),<br>p.(=)                                                                                  | ,, , , ,                               | ,, , , ,                               | 37,0,0        | 275,1,0        | 221,1,0        | 221,1,0        | 221,1,0        |
| DCTN1 | missense   | *ENST00000361874,<br>ENST00000407639,<br>ENST00000409567,<br>ENST00000409240,<br>ENST00000409438,<br>ENST00000394003,<br>ENST00000409868 | c.586A>G,<br>c.184A>G,<br>c.526A>G,<br>c.475A>G,<br>c.184A>G,<br>c.565A>G,<br>c.535A>G                                   | p.Ile196Val,<br>p.Ile62Val,<br>p.Ile176Val,<br>p.Ile159Val,<br>p.Ile62Val,<br>p.Ile189Val,<br>p.Ile179Val                | 0, 0,<br>0, 0,<br>0, 0,<br>0, 0,<br>0  | 0, 0,<br>0, 0,<br>0, 0,<br>0           | 18,0,0        | 120,3,0        | 104,3,0        | 4711,69,2      | 7617,76,2      |
| DCTN1 | synonymous | *ENST00000361874,<br>ENST00000409868,<br>ENST00000409567,<br>ENST00000409438,<br>ENST00000409240,<br>ENST00000394003,<br>ENST00000407639 | c.597G>A,<br>c.546G>A,<br>c.537G>A,<br>c.195G>A,<br>c.486G>A,<br>c.576G>A,<br>c.195G>A                                   | p.(=), p.(=),<br>p.(=), p.(=),<br>p.(=), p.(=),<br>p.(=)                                                                 | ,, , , ,<br>, ,                        | ,, , , ,<br>, ,                        | 18,0,0        | 121,1,0        | 97,0,0         | 4393,0,0       | 6583,7,0       |
| DCTN1 | missense   | *ENST00000361874,<br>ENST00000394003,<br>ENST00000409868,<br>ENST00000409438,<br>ENST00000409240,<br>ENST00000409567,<br>ENST00000407639 | <b>c.713G&gt;T,<br/>c.692G&gt;T,<br/>c.662G&gt;T,<br/>c.311G&gt;T,<br/>c.602G&gt;T,<br/>c.653G&gt;T,<br/>c.311G&gt;T</b> | <b>p.Arg238Leu,<br/>p.Arg231Leu,<br/>p.Arg221Leu,<br/>p.Arg104Leu,<br/>p.Arg201Leu,<br/>p.Arg218Leu,<br/>p.Arg104Leu</b> | <b>1, 1,<br/>1, 1,<br/>1, 1,<br/>1</b> | <b>2, 2,<br/>2, 2,<br/>2, 2,<br/>2</b> | <b>26,0,0</b> | <b>164,0,0</b> | <b>146,1,0</b> | <b>146,1,0</b> | <b>146,1,0</b> |
| DCTN1 | synonymous | *ENST00000361874,                                                                                                                        | c.801G>A,                                                                                                                | p.(=), p.(=),                                                                                                            | ,, , , ,                               | ,, , , ,                               | 16,0,0        | 128,1,0        | 143,0,0        | 143,0,0        | 143,0,0        |

|             |                   |                                                                                                                                                                                                                              |                                                                                                                               |                                                                                                                                                                        |                                             |                                 |               |                |                |                |                |
|-------------|-------------------|------------------------------------------------------------------------------------------------------------------------------------------------------------------------------------------------------------------------------|-------------------------------------------------------------------------------------------------------------------------------|------------------------------------------------------------------------------------------------------------------------------------------------------------------------|---------------------------------------------|---------------------------------|---------------|----------------|----------------|----------------|----------------|
|             |                   | <i>ENST00000407639, ENST00000409567, ENST00000409438, ENST00000394003, ENST00000409868, ENST00000409240</i>                                                                                                                  | <i>c.399G&gt;A, c.741G&gt;A, c.399G&gt;A, c.780G&gt;A, c.750G&gt;A, c.690G&gt;A</i>                                           | <i>p.(=), p.(=), p.(=), p.(=), p.(=)</i>                                                                                                                               | , ,                                         | , ,                             |               |                |                |                |                |
| DCTN1       | missense          | *ENST00000361874, ENST00000458655, ENST00000417090, ENST00000409868, ENST00000413111, ENST00000437375, ENST00000394003, ENST00000421392, ENST00000440727, ENST00000454119, ENST00000409567, ENST00000409240, ENST00000449655 | c.82C>T, c.103C>T, c.94C>T, c.31C>T, c.31C>T, c.31C>T, c.82C>T, c.31C>T, c.31C>T, c.31C>T, c.31C>T, c.82C>T, c.31C>T, c.31C>T | p.Arg28Trp, p.Arg35Trp, p.Arg32Trp, p.Arg11Trp, p.Arg11Trp, p.Arg11Trp, p.Arg28Trp, p.Arg11Trp, p.Arg11Trp, p.Arg11Trp, p.Arg11Trp, p.Arg28Trp, p.Arg11Trp, p.Arg11Trp | 1, 1, 1, 1, 1, 1, 1, 1, 1, 1, 1, 1, 1, 1, 1 | 1, 1, 2, 1, 1, 1, 1, 1, 1, 1, 1 | 45,0,0        | 308,0,0        | 235,2,0        | 235,2,0        | 235,2,0        |
| <b>DPP6</b> | <b>synonymous</b> | <b>*ENST00000377770, ENST00000406326</b>                                                                                                                                                                                     | <b>c.114C&gt;T, c.114C&gt;T</b>                                                                                               | <b>p.(=), p.(=)</b>                                                                                                                                                    | ,                                           | ,                               | <b>0,1,0</b>  | <b>0,1,0</b>   | <b>0,0,0</b>   | <b>0,0,0</b>   | <b>0,0,0</b>   |
| DPP6        | synonymous        | *ENST00000377770, ENST00000332007, ENST00000404039, ENST00000427557                                                                                                                                                          | c.1458C>T, c.1272C>T, c.1266C>T, c.1137C>T                                                                                    | p.(=), p.(=), p.(=), p.(=)                                                                                                                                             | , , ,                                       | , , ,                           | 46,1,0        | 364,2,0        | 293,1,0        | 4469,8,0       | 6544,11,0      |
| DPP6        | missense          | *ENST00000377770, ENST00000332007, ENST00000427557, ENST00000404039                                                                                                                                                          | c.1459G>A, c.1273G>A, c.1138G>A, c.1267G>A                                                                                    | p.Val487Met, p.Val425Met, p.Val380Met, p.Val423Met                                                                                                                     | 1, 1, 1, 1                                  | 2, 2, 2, 2                      | 49,0,0        | 364,0,0        | 298,1,0        | 298,1,0        | 298,1,0        |
| <b>DPP6</b> | <b>missense</b>   | <b>*ENST00000377770, ENST00000427557, ENST00000332007, ENST00000404039</b>                                                                                                                                                   | <b>c.1616T&gt;C, c.1295T&gt;C, c.1430T&gt;C, c.1424T&gt;C</b>                                                                 | <b>p.Phe539Ser, p.Phe432Ser, p.Phe477Ser, p.Phe475Ser</b>                                                                                                              | <b>1, 1, 1, 1</b>                           | <b>2, 1, 1, 2</b>               | <b>50,0,0</b> | <b>351,0,0</b> | <b>296,1,0</b> | <b>296,1,0</b> | <b>296,1,0</b> |
| DPP6        | missense          | *ENST00000377770, ENST00000404039,                                                                                                                                                                                           | c.1711A>C, c.1519A>C,                                                                                                         | p.Lys571Gln, p.Lys507Gln,                                                                                                                                              | 0, 0, 0, 0                                  | 0, 0, 0, 0                      | 50,0,0        | 389,0,0        | 294,1,0        | 4770,8,0       | 7337,25,0      |

|             |                            |                                                                                        |                                                                                          |                                       |            |            |               |                |                |                    |                |  |
|-------------|----------------------------|----------------------------------------------------------------------------------------|------------------------------------------------------------------------------------------|---------------------------------------|------------|------------|---------------|----------------|----------------|--------------------|----------------|--|
|             |                            | ENST00000427557,<br>ENST00000332007                                                    | c.1390A>C,<br>c.1525A>C                                                                  | p.Lys464Gln,<br>p.Lys509Gln           |            |            |               |                |                |                    |                |  |
| DPP6        | synonymous                 | *ENST00000377770,<br>ENST00000427557,<br>ENST00000332007,<br>ENST00000404039           | c.1896A>G,<br>c.1575A>G,<br>c.1710A>G,<br>c.1704A>G                                      | p.(=), p.(=),<br>p.(=), p.(=)         | '''        | '''        | 2,9,0         | 18,56,10       | 29,49,2        | 1087,2329,122<br>6 | 1343,3452,2626 |  |
| DPP6        | synonymous                 | *ENST00000377770,<br>ENST00000332007,<br>ENST00000427557,<br>ENST00000404039           | c.1911G>A,<br>c.1725G>A,<br>c.1590G>A,<br>c.1719G>A                                      | p.(=), p.(=),<br>p.(=), p.(=)         | '''        | '''        | 5,10,1        | 33,72,14       | 35,58,4        | 1971,2118,580      | 3968,2838,652  |  |
| DPP6        | synonymous                 | *ENST00000377770,<br>ENST00000332007,<br>ENST00000404039,<br>ENST00000427557           | c.2127T>C,<br>c.1941T>C,<br>c.1935T>C,<br>c.1806T>C                                      | p.(=), p.(=),<br>p.(=), p.(=)         | '''        | '''        | 28,16,2       | 197,118,14     | 170,90,17      | 3275,1447,165      | 4371,2723,627  |  |
| DPP6        | synonymous                 | *ENST00000377770,<br>ENST00000427557,<br>ENST00000404039,<br>ENST00000332007           | c.2205C>T,<br>c.1884C>T,<br>c.2013C>T,<br>c.2019C>T                                      | p.(=), p.(=),<br>p.(=), p.(=)         | '''        | '''        | 49,0,0        | 344,4,0        | 261,7,0        | 4756,43,0          | 7352,114,7     |  |
| <b>DPP6</b> | <b>synonymous</b>          | <b>*ENST00000377770,<br/>ENST00000404039,<br/>ENST00000427557,<br/>ENST00000332007</b> | <b>c.2295A&gt;G<br/>,<br/>c.2103A&gt;G<br/>,<br/>c.1974A&gt;G<br/>,<br/>c.2109A&gt;G</b> | <b>p.(=), p.(=),<br/>p.(=), p.(=)</b> | <b>'''</b> | <b>'''</b> | <b>49,0,0</b> | <b>356,2,0</b> | <b>296,0,0</b> | <b>296,0,0</b>     | <b>296,0,0</b> |  |
| DPP6        | synonymous                 | *ENST00000377770,<br>ENST00000404039,<br>ENST00000427557,<br>ENST00000332007           | c.2331C>T,<br>c.2139C>T,<br>c.2010C>T,<br>c.2145C>T                                      | p.(=), p.(=),<br>p.(=), p.(=)         | '''        | '''        | 48,0,0        | 372,0,0        | 286,0,0        | 4841,6,0           | 7577,13,0      |  |
| DPP6        | synonymous                 | *ENST00000377770,<br>ENST00000404039,<br>ENST00000332007,<br>ENST00000427557           | c.2373C>T,<br>c.2181C>T,<br>c.2187C>T,<br>c.2052C>T                                      | p.(=), p.(=),<br>p.(=), p.(=)         | '''        | '''        | 36,13,0       | 313,58,3       | 236,43,4       | 3799,975,60        | 6182,1258,109  |  |
| <b>DPP6</b> | <b>splice<br/>acceptor</b> | <b>*ENST00000377770,<br/>ENST00000332007,</b>                                          | <b>c.2378-<br/>1G&gt;A,</b>                                                              | <b>'''</b>                            | <b>'''</b> | <b>'''</b> | <b>48,0,0</b> | <b>358,6,0</b> | <b>254,2,0</b> | <b>254,2,0</b>     | <b>254,2,0</b> |  |

|             |                            |                                                                              |                                                               |                                                             |               |               |              |              |              |                    |                    |
|-------------|----------------------------|------------------------------------------------------------------------------|---------------------------------------------------------------|-------------------------------------------------------------|---------------|---------------|--------------|--------------|--------------|--------------------|--------------------|
|             |                            | <b>ENST00000427557,<br/>ENST00000404039</b>                                  | <b>c.2192-1G&gt;A,<br/>c.2057-1G&gt;A,<br/>c.2186-1G&gt;A</b> |                                                             |               |               |              |              |              |                    |                    |
| DPP6        | synonymous                 | *ENST00000377770,<br>ENST00000427557,<br>ENST00000332007,<br>ENST00000404039 | c.2427G>A,<br>c.2106G>A,<br>c.2241G>A,<br>c.2235G>A           | p.(=), p.(=),<br>p.(=), p.(=)                               | ,, ,          | ,, ,          | 34,14,2      | 299,86,6     | 226,62,5     | 3578,1116,101      | 4732,2251,422      |
| DPP6        | missense                   | *ENST00000377770,<br>ENST00000332007,<br>ENST00000404039,<br>ENST00000427557 | c.2561T>C,<br>c.2375T>C,<br>c.2369T>C,<br>c.2240T>C           | p.Leu854Pro,<br>p.Leu792Pro,<br>p.Leu790Pro,<br>p.Leu747Pro | 1, 0,<br>0, 0 | 0, 0,<br>0, 0 | 23,21,6      | 211,144,29   | 154,122,24   | 2637,1875,406      | 3479,3231,1056     |
| DPP6        | synonymous                 | *ENST00000377770,<br>ENST00000404039,<br>ENST00000332007                     | c.657C>T,<br>c.465C>T,<br>c.471C>T                            | p.(=), p.(=),<br>p.(=)                                      | ,,            | ,,            | 4,28,17      | 39,167,182   | 31,127,124   | 419,1939,2397      | 910,3103,3299      |
| DPP6        | synonymous                 | *ENST00000377770,<br>ENST00000404039,<br>ENST00000332007                     | c.666C>T,<br>c.474C>T,<br>c.480C>T                            | p.(=), p.(=),<br>p.(=)                                      | ,,            | ,,            | 48,2,0       | 382,9,0      | 282,3,0      | 4707,46,0          | 7261,52,0          |
| DPP6        | synonymous                 | *ENST00000377770,<br>ENST00000332007,<br>ENST00000404039                     | c.723A>G,<br>c.537A>G,<br>c.531A>G                            | p.(=), p.(=),<br>p.(=)                                      | ,,            | ,,            | 0,8,41       | 4,52,324     | 3,49,245     | 51,812,3908        | 297,1822,5229      |
| <b>DPP6</b> | <b>missense</b>            | <b>*, ENST00000406326</b>                                                    | <b>c.785C&gt;T</b>                                            | <b>p.Ser262Leu</b>                                          |               |               | <b>0,0,0</b> | <b>0,0,0</b> | <b>0,1,0</b> | <b>1946,400,23</b> | <b>3326,597,34</b> |
| DPP6        | synonymous                 | *ENST00000377770,<br>ENST00000404039,<br>ENST00000332007,<br>ENST00000427557 | c.879T>C,<br>c.687T>C,<br>c.693T>C,<br>c.558T>C               | p.(=), p.(=),<br>p.(=), p.(=)                               | ,, ,          | ,, ,          | 50,0,0       | 388,1,0      | 296,0,0      | 296,0,0            | 296,0,0            |
| DPP6        | missense,<br>splice region | *ENST00000377770,<br>ENST00000332007,<br>ENST00000427557,<br>ENST00000404039 | c.883G>A,<br>c.697G>A,<br>c.562G>A,<br>c.691G>A               | p.Glu295Lys,<br>p.Glu233Lys,<br>p.Glu188Lys,<br>p.Glu231Lys | 1, 1,<br>1, 1 | 2, 2,<br>2, 2 | 50,0,0       | 389,1,0      | 296,0,0      | 296,0,0            | 296,0,0            |
| DPP6        | synonymous                 | *ENST00000377770,<br>ENST00000332007,<br>ENST00000427557,                    | c.945C>T,<br>c.759C>T,<br>c.624C>T,                           | p.(=), p.(=),<br>p.(=), p.(=)                               | ,, ,          | ,, ,          | 45,3,0       | 325,44,2     | 248,49,1     | 4080,736,32        | 6300,1226,61       |

|             |                 |                                                                                                                                                              |                                                                                                        |                                                                                                                           |                                 |                                 |              |              |              |              |              |
|-------------|-----------------|--------------------------------------------------------------------------------------------------------------------------------------------------------------|--------------------------------------------------------------------------------------------------------|---------------------------------------------------------------------------------------------------------------------------|---------------------------------|---------------------------------|--------------|--------------|--------------|--------------|--------------|
|             |                 | ENST00000404039                                                                                                                                              | c.753C>T                                                                                               |                                                                                                                           |                                 |                                 |              |              |              |              |              |
| DPP6        | synonymous      | *ENST00000377770,<br>ENST00000404039,<br>ENST00000427557,<br>ENST00000332007                                                                                 | c.948C>T,<br>c.756C>T,<br>c.627C>T,<br>c.762C>T                                                        | p.(=), p.(=),<br>p.(=), p.(=)                                                                                             | ''''                            | ''''                            | 47,0,0       | 371,1,0      | 292,0,0      | 4460,0,0     | 6472,3,0     |
| <b>DPP6</b> | <b>missense</b> | <b>*ENST00000406326</b>                                                                                                                                      | <b>c.982T&gt;G</b>                                                                                     | <b>p.Cys328Gly</b>                                                                                                        |                                 |                                 | <b>0,0,0</b> | <b>0,0,0</b> | <b>0,0,0</b> | <b>0,0,0</b> | <b>0,0,0</b> |
| ELP3        | synonymous      | *ENST00000256398,<br>ENST00000524103,<br>ENST00000380353,<br>ENST00000537665,<br>ENST00000521015,<br>ENST00000542181                                         | c.1068G>A,<br>c.852G>A,<br>c.792G>A,<br>c.711G>A,<br>c.1026G>A,<br>c.681G>A                            | p.(=), p.(=),<br>p.(=), p.(=),<br>p.(=), p.(=)                                                                            | '''''                           | '''''                           | 50,0,0       | 386,1,0      | 298,1,0      | 298,1,0      | 298,1,0      |
| ELP3        | missense        | *ENST00000256398,<br>ENST00000517975,<br>ENST00000523357,<br>ENST00000380353,<br>ENST00000524103,<br>ENST00000521015,<br>ENST00000537665,<br>ENST00000542181 | c.1318G>A,<br>c.97G>A,<br>c.115G>A,<br>c.1042G>A,<br>c.1102G>A,<br>c.1276G>A,<br>c.961G>A,<br>c.931G>A | p.Glu440Lys,<br>p.Glu33Lys,<br>p.Glu39Lys,<br>p.Glu348Lys,<br>p.Glu368Lys,<br>p.Glu426Lys,<br>p.Glu321Lys,<br>p.Glu311Lys | 1, 1,<br>1, 1,<br>1, 1,<br>1, 1 | 1, 2,<br>2, 1,<br>1, 1,<br>1, 1 | 49,0,0       | 363,1,0      | 259,2,0      | 4936,3,0     | 7852,3,0     |
| ELP3        | missense        | *ENST00000256398,<br>ENST00000521015,<br>ENST00000521570,<br>ENST00000524024,<br>ENST00000521099,<br>ENST00000520288,<br>ENST00000520270                     | c.139G>A,<br>c.97G>A,<br>c.97G>A,<br>c.139G>A,<br>c.97G>A,<br>c.97G>A,<br>c.97G>A                      | p.Ala47Thr,<br>p.Ala33Thr,<br>p.Ala33Thr,<br>p.Ala47Thr,<br>p.Ala33Thr,<br>p.Ala33Thr,<br>p.Ala33Thr                      | 1, 1,<br>1, 1,<br>1, 1,<br>1    | 0, 0,<br>0, 0,<br>0, 0,<br>0    | 50,0,0       | 380,3,0      | 302,0,0      | 4600,2,0     | 6803,2,0     |
| ELP3        | missense        | *ENST00000256398,<br>ENST00000380353,<br>ENST00000521015,<br>ENST00000542181,<br>ENST00000524103,<br>ENST00000523357,<br>ENST00000537665                     | c.1459C>T,<br>c.1183C>T,<br>c.1417C>T,<br>c.1072C>T,<br>c.1243C>T,<br>c.256C>T,<br>c.1102C>T           | p.Arg487Trp,<br>p.Arg395Trp,<br>p.Arg473Trp,<br>p.Arg358Trp,<br>p.Arg415Trp,<br>p.Arg86Trp,<br>p.Arg368Trp                | 1, 0,<br>1, 0,<br>0, 0,<br>0    | 2, 2,<br>2, 2,<br>2, 2,<br>2    | 46,0,0       | 330,1,0      | 199,1,0      | 4870,8,0     | 7786,8,0     |
| ELP3        | missense        | *ENST00000256398,                                                                                                                                            | c.206G>T,                                                                                              | p.Arg69Leu,                                                                                                               | 1, 1,                           | 0, 0,                           | 50,0,0       | 380,1,0      | 294,0,0      | 294,0,0      | 294,0,0      |



|             |                                          |                                                                                                                                                                                                                          |                                                                                                                                        |                                                                                                                                                                 |                                                |                                                |              |              |              |                 |                   |  |
|-------------|------------------------------------------|--------------------------------------------------------------------------------------------------------------------------------------------------------------------------------------------------------------------------|----------------------------------------------------------------------------------------------------------------------------------------|-----------------------------------------------------------------------------------------------------------------------------------------------------------------|------------------------------------------------|------------------------------------------------|--------------|--------------|--------------|-----------------|-------------------|--|
|             |                                          | ENST00000520288,<br>ENST00000521570,<br>ENST00000521015,<br>ENST00000521099,<br>ENST00000524024,<br>ENST00000520270                                                                                                      | c.164G>T,<br>c.164G>T,<br>c.164G>T,<br>c.164G>T,<br>c.206G>T,<br>c.164G>T                                                              | p.Arg55Leu,<br>p.Arg55Leu,<br>p.Arg55Leu,<br>p.Arg55Leu,<br>p.Arg69Leu,<br>p.Arg55Leu                                                                           | 1, 1,<br>1, 1,<br>1                            | 0, 0,<br>0, 1,<br>0                            |              |              |              |                 |                   |  |
| ELP3        | initiator<br>codon,<br>missense          | *ENST00000256398,<br>ENST00000521099,<br>ENST00000524103,<br>ENST00000380353,<br>ENST00000520288,<br>ENST00000542181,<br>ENST00000521570,<br>ENST00000524024,<br>ENST00000521015,<br>ENST00000520270,<br>ENST00000537665 | c.326G>A,<br>c.284G>A,<br>c.110G>A,<br>c.50G>A,<br>c.284G>A,<br>c.3G>A,<br>c.284G>A,<br>c.326G>A,<br>c.284G>A,<br>c.284G>A,<br>c.33G>A | p.Cys109Tyr,<br>p.Cys95Tyr,<br>p.Cys37Tyr,<br>p.Cys17Tyr,<br>p.Cys95Tyr,<br>p.Met1?,<br>p.Cys95Tyr,<br>p.Cys109Tyr,<br>p.Cys95Tyr,<br>p.Cys95Tyr,<br>p.Met11Ile | 1, 1,<br>1, 1,<br>1, 1,<br>1, 1,<br>1, 1,<br>1 | 2, 2,<br>2, 2,<br>2, 0,<br>2, 2,<br>2, 2,<br>0 | 49,1,0       | 389,1,0      | 278,0,0      | 4577,1,0        | 6780,1,0          |  |
| <b>ELP3</b> | <b>splice<br/>region,<br/>synonymous</b> | <b>*ENST00000523357</b>                                                                                                                                                                                                  | <b>c.366G&gt;A</b>                                                                                                                     | <b>p.(=)</b>                                                                                                                                                    |                                                |                                                | <b>0,0,0</b> | <b>0,0,0</b> | <b>0,0,0</b> | <b>287,82,9</b> | <b>833,223,35</b> |  |
| FGGY        | synonymous                               | *ENST00000371218,<br>ENST00000303721,<br>ENST00000371210,<br>ENST00000371212                                                                                                                                             | c.1053A>G,<br>c.1053A>G,<br>c.156A>G,<br>c.789A>G                                                                                      | p.(=), p.(=),<br>p.(=), p.(=)                                                                                                                                   | ,,,                                            | ,,,                                            | 50,0,0       | 389,1,0      | 281,2,0      | 4580,3,0        | 6783,3,0          |  |
| FGGY        | splice donor                             | *ENST00000371218,<br>ENST00000303721,<br>ENST00000371212,<br>ENST00000371210                                                                                                                                             | c.1221+2T<br>>C,<br>c.1221+2T<br>>C,<br>c.957+2T><br>C,<br>c.324+2T><br>C                                                              | ,,,                                                                                                                                                             | ,,,                                            | ,,,                                            | 49,1,0       | 384,6,0      | 287,6,0      | 4924,47,0       | 7835,52,0         |  |
| FGGY        | missense                                 | *ENST00000371218,<br>ENST00000582567,<br>ENST00000413489,                                                                                                                                                                | c.129T>G,<br>c.129T>G,<br>c.129T>G,                                                                                                    | p.Asn43Lys,<br>p.Asn43Lys,<br>p.Asn43Lys,                                                                                                                       | 0, 0,<br>0, 0,<br>0                            | 0, 0,<br>0, 0,<br>0                            | 17,24,8      | 143,187,31   | 117,139,46   | 1848,1892,521   | 2391,3053,1098    |  |

|             |                                               |                                                                                                  |                                                                           |                                                                                    |                     |                     |               |                |                |                |                |                |
|-------------|-----------------------------------------------|--------------------------------------------------------------------------------------------------|---------------------------------------------------------------------------|------------------------------------------------------------------------------------|---------------------|---------------------|---------------|----------------|----------------|----------------|----------------|----------------|
|             |                                               | ENST00000303721,<br>ENST00000371212                                                              | c.129T>G,<br>c.129T>G                                                     | p.Asn43Lys,<br>p.Asn43Lys                                                          |                     |                     |               |                |                |                |                |                |
| FGGY        | synonymous                                    | *ENST00000371218,<br>ENST00000303721,<br>ENST00000371212,<br>ENST00000371210                     | c.1560C>T,<br>c.1488C>T,<br>c.1224C>T,<br>c.591C>T                        | p.(=), p.(=),<br>p.(=), p.(=)                                                      | '''                 | '''                 | 46,0,0        | 310,0,0        | 285,1,0        | 285,1,0        | 285,1,0        | 285,1,0        |
| FGGY        | missense                                      | *ENST00000371218,<br>ENST00000371210,<br>ENST00000303721,<br>ENST00000371212                     | c.1716G>A,<br>c.747G>A,<br>c.1644G>A,<br>c.1380G>A                        | p.Met572Ile,<br>p.Met249Ile,<br>p.Met548Ile,<br>p.Met460Ile                        | 0, 0,<br>0, 0       | 1, 1,<br>1, 1       | 48,0,0        | 375,1,0        | 285,0,0        | 285,0,0        | 285,0,0        | 285,0,0        |
| FGGY        | missense                                      | *ENST00000371218,<br>ENST00000413489,<br>ENST00000303721,<br>ENST00000371212                     | c.188G>C,<br>c.188G>C,<br>c.188G>C,<br>c.188G>C                           | p.Cys63Ser,<br>p.Cys63Ser,<br>p.Cys63Ser,<br>p.Cys63Ser                            | 1, 1,<br>1, 1       | 1, 1,<br>1, 0       | 49,0,0        | 351,1,0        | 293,0,0        | 4251,2,0       | 6529,5,0       | 6529,5,0       |
| <b>FGGY</b> | <b>feature<br/>elongation,<br/>frameshift</b> | <b>*ENST00000371218,<br/>ENST00000303721,<br/>ENST00000413489</b>                                | <b>c.411_412i<br/>nsG,<br/>c.411_412i<br/>nsG,<br/>c.411_412i<br/>nsG</b> | <b>p.Val140Glyf<br/>sX25,<br/>p.Val140Glyf<br/>sX25,<br/>p.Val140Glyf<br/>sX25</b> | ''                  | ''                  | <b>50,0,0</b> | <b>365,1,0</b> | <b>299,0,0</b> | <b>299,0,0</b> | <b>299,0,0</b> | <b>299,0,0</b> |
| FGGY        | missense                                      | *ENST00000371218,<br>ENST00000303721,<br>ENST00000371212,<br>ENST00000582567,<br>ENST00000413489 | c.49G>A,<br>c.49G>A,<br>c.49G>A,<br>c.49G>A,<br>c.49G>A                   | p.Val17Ile,<br>p.Val17Ile,<br>p.Val17Ile,<br>p.Val17Ile,<br>p.Val17Ile             | 1, 1,<br>1, 1,<br>1 | 2, 2,<br>2, 2,<br>2 | 47,1,0        | 308,2,0        | 225,1,0        | 3800,8,0       | 5367,9,0       | 5367,9,0       |
| FGGY        | synonymous                                    | *ENST00000371218,<br>ENST00000371212,<br>ENST00000413489,<br>ENST00000303721                     | c.516G>A,<br>c.252G>A,<br>c.516G>A,<br>c.516G>A                           | p.(=), p.(=),<br>p.(=), p.(=)                                                      | '''                 | '''                 | 17,24,9       | 137,199,49     | 91,151,44      | 1899,2327,737  | 2388,3679,1812 | 2388,3679,1812 |
| FGGY        | synonymous                                    | *ENST00000371218,<br>ENST00000413489,<br>ENST00000371212,<br>ENST00000303721                     | c.516G>C,<br>c.516G>C,<br>c.252G>C,<br>c.516G>C                           | p.(=), p.(=),<br>p.(=), p.(=)                                                      | '''                 | '''                 | 50,0,0        | 384,1,0        | 286,0,0        | 286,0,0        | 286,0,0        | 286,0,0        |
| FGGY        | missense                                      | *ENST00000371218,<br>ENST00000303721,                                                            | c.614G>A,<br>c.614G>A,                                                    | p.Ser205Asn,<br>p.Ser205Asn,                                                       | 0, 0,<br>0          | 0, 0,<br>0          | 50,0,0        | 388,1,0        | 284,0,0        | 4582,2,0       | 6785,2,0       | 6785,2,0       |

|             |                              |                                                                              |                                                      |                                                            |                    |                    |               |                |                |                |                |                |
|-------------|------------------------------|------------------------------------------------------------------------------|------------------------------------------------------|------------------------------------------------------------|--------------------|--------------------|---------------|----------------|----------------|----------------|----------------|----------------|
|             |                              | ENST00000371212                                                              | c.350G>A                                             | p.Ser117Asn                                                |                    |                    |               |                |                |                |                |                |
| <b>FGGY</b> | <b>missense</b>              | <b>*ENST00000371218,<br/>ENST00000303721,<br/>ENST00000371212</b>            | <b>c.622A&gt;G,<br/>c.622A&gt;G,<br/>c.358A&gt;G</b> | <b>p.Lys208Glu,<br/>p.Lys208Glu,<br/>p.Lys120Glu</b>       | <b>0, 0,<br/>0</b> | <b>0, 0,<br/>0</b> | <b>50,0,0</b> | <b>389,0,0</b> | <b>280,1,0</b> | <b>280,1,0</b> | <b>280,1,0</b> | <b>280,1,0</b> |
| FGGY        | synonymous                   | *ENST00000371218,<br>ENST00000371212,<br>ENST00000303721                     | c.630T>A,<br>c.366T>A,<br>c.630T>A                   | p.(=), p.(=),<br>p.(=)                                     | ,,                 | ,,                 | 50,0,0        | 387,1,0        | 281,0,0        | 281,0,0        | 281,0,0        | 281,0,0        |
| FGGY        | missense,<br>splice region   | *ENST00000371218,<br>ENST00000371212,<br>ENST00000303721                     | c.800G>T,<br>c.536G>T,<br>c.800G>T                   | p.Gly267Val,<br>p.Gly179Val,<br>p.Gly267Val                | 1, 1,<br>1         | 2, 2,<br>2         | 49,0,0        | 359,1,0        | 294,4,0        | 4958,18,0      | 7872,20,0      |                |
| FGGY        | missense                     | *ENST00000371218,<br>ENST00000303721,<br>ENST00000371212                     | c.857C>T,<br>c.857C>T,<br>c.593C>T                   | p.Thr286Met,<br>p.Thr286Met,<br>p.Thr198Met                | 0, 0,<br>1         | 1, 2,<br>1         | 39,5,2        | 292,55,3       | 238,46,8       | 4364,579,27    | 7223,635,28    |                |
| FGGY        | splice region,<br>synonymous | *ENST00000371218,<br>ENST00000371212,<br>ENST00000303721,<br>ENST00000371210 | c.903G>T,<br>c.639G>T,<br>c.903G>T,<br>c.6G>T        | p.(=), p.(=),<br>p.(=), p.(=)                              | ,,,                | ,,,                | 50,0,0        | 357,1,0        | 302,1,0        | 4600,3,0       | 6803,3,0       |                |
| FGGY        | missense                     | *ENST00000371218,<br>ENST00000303721,<br>ENST00000371212,<br>ENST00000371210 | c.979A>C,<br>c.979A>C,<br>c.715A>C,<br>c.82A>C       | p.Asn327His,<br>p.Asn327His,<br>p.Asn239His,<br>p.Asn28His | 1, 1,<br>1, 1      | 0, 2,<br>2, 2      | 50,0,0        | 383,1,0        | 295,0,0        | 4586,9,0       | 6789,9,0       |                |
| FIG4        | missense                     | *ENST00000230124,<br>ENST00000441478                                         | c.1090A>T,<br>c.259A>T                               | p.Met364Leu,<br>p.Met87Leu                                 | 0, 0               | 0, 0               | 47,3,0        | 363,24,1       | 271,24,0       | 4611,355,7     | 7272,592,25    |                |
| FIG4        | missense                     | *ENST00000230124,<br>ENST00000454215                                         | c.122T>C,<br>c.59T>C                                 | p.Ile41Thr,<br>p.Ile20Thr                                  | 1, 1               | 2, 2               | 46,0,0        | 360,1,0        | 238,2,0        | 4899,18,0      | 7814,19,0      |                |
| FIG4        | synonymous                   | *ENST00000230124,<br>ENST00000441478                                         | c.1305G>C,<br>c.474G>C                               | p.(=), p.(=)                                               | ,                  | ,                  | 50,0,0        | 388,1,0        | 281,0,0        | 4579,2,0       | 6782,2,0       |                |
| FIG4        | missense                     | *ENST00000230124,<br>ENST00000441478                                         | c.1426C>T,<br>c.595C>T                               | p.Arg476Cys,<br>p.Arg199Cys                                | 1, 1               | 0, 0               | 47,0,0        | 354,1,0        | 244,0,0        | 622,0,0        | 1334,1,0       |                |
| FIG4        | synonymous                   | *ENST00000230124,<br>ENST00000441478                                         | c.1525C>T,<br>c.694C>T                               | p.(=), p.(=)                                               | ,                  | ,                  | 49,0,0        | 387,1,0        | 287,0,0        | 4586,1,0       | 6789,1,0       |                |
| FIG4        | synonymous                   | *ENST00000230124,<br>ENST00000441478                                         | c.1527G>A,<br>c.696G>A                               | p.(=), p.(=)                                               | ,                  | ,                  | 50,0,0        | 387,0,0        | 287,1,0        | 287,1,0        | 287,1,0        |                |
| FIG4        | missense                     | *ENST00000230124,<br>ENST00000441478,                                        | c.1793T>A,<br>c.962T>A,                              | p.Phe598Tyr,<br>p.Phe321Tyr,                               | 0, 0,<br>0         | 0, 0,<br>0         | 38,0,0        | 336,0,0        | 219,1,0        | 219,1,0        | 219,1,0        |                |

|             |                             |                                                                                        |                                                                                        |                                                      |                  |                    |               |                |                |                 |                 |
|-------------|-----------------------------|----------------------------------------------------------------------------------------|----------------------------------------------------------------------------------------|------------------------------------------------------|------------------|--------------------|---------------|----------------|----------------|-----------------|-----------------|
|             |                             | ENST00000415980                                                                        | c.210T>A                                                                               | p.Phe71Tyr                                           |                  |                    |               |                |                |                 |                 |
| FIG4        | missense                    | *ENST00000230124,<br>ENST00000441478                                                   | c.1961T>C,<br>c.1130T>C                                                                | p.Val654Ala,<br>p.Val377Ala                          | 0, 0             | 0, 0               | 37,11,2       | 287,96,7       | 184,77,9       | 3552,1263,132   | 4030,2504,1329  |
| <b>FIG4</b> | <b>missense</b>             | <b>*ENST00000230124,<br/>ENST00000419951,<br/>ENST00000441478</b>                      | <b>c.2200G&gt;A<br/>, c.121G&gt;A,<br/>c.1369G&gt;A</b>                                | <b>p.Glu734Lys,<br/>p.Glu41Lys,<br/>p.Glu457Lys</b>  | <b>0,,<br/>0</b> | <b>0, 0,<br/>1</b> | <b>41,0,0</b> | <b>216,1,0</b> | <b>216,1,0</b> | <b>4514,3,0</b> | <b>6717,3,0</b> |
| FIG4        | synonymous                  | *ENST00000230124,<br>ENST00000441478                                                   | c.2559G>A,<br>c.1641G>A                                                                | p.(=), p.(=)                                         | ,                | ,                  | 13,22,1<br>5  | 107,190,79     | 92,139,49      | 1738,2355,865   | 3648,3195,1031  |
| <b>FIG4</b> | <b>splice<br/>acceptor</b>  | <b>*ENST00000230124,<br/>ENST00000454215,<br/>ENST00000441478,<br/>ENST00000368941</b> | <b>c.447-<br/>2A&gt;T,<br/>c.384-<br/>2A&gt;T, c.9-<br/>2A&gt;T,<br/>c.216-2A&gt;T</b> | <b>''''</b>                                          | <b>''''</b>      | <b>''''</b>        | <b>43,1,0</b> | <b>320,6,0</b> | <b>220,1,0</b> | <b>220,1,0</b>  | <b>220,1,0</b>  |
| FUS         | synonymous                  | *ENST00000254108,<br>ENST00000380244,<br>ENST00000568685                               | c.1080C>T,<br>c.1077C>T,<br>c.1083C>T                                                  | p.(=), p.(=),<br>p.(=)                               | ,,               | ,,                 | 38,0,0        | 213,2,0        | 166,2,0        | 4841,5,0        | 7750,5,0        |
| <b>FUS</b>  | <b>inframe<br/>deletion</b> | <b>*ENST00000254108,<br/>ENST00000568685,<br/>ENST00000380244</b>                      | <b>c.1204_12<br/>06delAGT,<br/>c.1207_12<br/>09delAGT,<br/>c.1201_12<br/>03delAGT</b>  | <b>p.Ser402del,<br/>p.Ser403del,<br/>p.Ser401del</b> | <b>,,</b>        | <b>,,</b>          | <b>50,0,0</b> | <b>364,1,0</b> | <b>296,0,0</b> | <b>296,0,0</b>  | <b>296,0,0</b>  |
| FUS         | synonymous                  | *ENST00000254108,<br>ENST00000380244,<br>ENST00000568685                               | c.132C>T,<br>c.132C>T,<br>c.132C>T                                                     | p.(=), p.(=),<br>p.(=)                               | ,,               | ,,                 | 50,0,0        | 376,0,0        | 303,1,0        | 4601,3,0        | 6798,3,0        |
| FUS         | synonymous                  | *ENST00000254108,<br>ENST00000380244,<br>ENST00000568685                               | c.147C>A,<br>c.147C>A,<br>c.147C>A                                                     | p.(=), p.(=),<br>p.(=)                               | ,,               | ,,                 | 29,13,6       | 173,158,44     | 133,137,33     | 2475,2086,420   | 4866,2551,474   |
| FUS         | synonymous                  | *ENST00000254108,<br>ENST00000568685,<br>ENST00000380244                               | c.153C>T,<br>c.153C>T,<br>c.153C>T                                                     | p.(=), p.(=),<br>p.(=)                               | ,,               | ,,                 | 49,0,0        | 376,0,0        | 303,3,0        | 4947,37,0       | 7383,480,31     |
| <b>FUS</b>  | <b>synonymous</b>           | <b>*ENST00000254108,<br/>ENST00000380244,<br/>ENST00000568685</b>                      | <b>c.1545T&gt;G,<br/>c.1542T&gt;G,<br/>c.1548T&gt;G</b>                                | <b>p.(=), p.(=),<br/>p.(=)</b>                       | <b>,,</b>        | <b>,,</b>          | <b>38,0,0</b> | <b>259,6,0</b> | <b>227,6,0</b> | <b>227,6,0</b>  | <b>227,6,0</b>  |

|            |                         |                                                                   |                                                                                 |                                                   |            |            |               |                |                |                    |                |
|------------|-------------------------|-------------------------------------------------------------------|---------------------------------------------------------------------------------|---------------------------------------------------|------------|------------|---------------|----------------|----------------|--------------------|----------------|
| FUS        | synonymous              | *ENST00000254108,<br>ENST00000568685,<br>ENST00000380244          | c.1566G>A,<br>c.1569G>A,<br>c.1563G>A                                           | p.(=), p.(=),<br>p.(=)                            | ,,         | ,,         | 47,0,0        | 337,1,0        | 280,0,0        | 4940,18,0          | 7845,23,0      |
| FUS        | missense                | *ENST00000254108,<br>ENST00000568685,<br>ENST00000380244          | c.1574C>T,<br>c.1577C>T,<br>c.1571C>T                                           | p.Pro525Leu,<br>p.Pro526Leu,<br>p.Pro524Leu       | 1, 1,<br>1 | 1, 2,<br>2 | 43,0,0        | 317,2,0        | 250,0,0        | 250,0,0            | 250,0,0        |
| <b>FUS</b> | <b>inframe deletion</b> | <b>*ENST00000254108,<br/>ENST00000568685,<br/>ENST00000380244</b> | <b>c.165_167<br/>delTTC,<br/>c.165_167<br/>delTTC,<br/>c.165_167<br/>delTTC</b> | <b>p.Ser56del,<br/>p.Ser56del,<br/>p.Ser56del</b> | ,,         | ,,         | <b>48,0,0</b> | <b>372,0,0</b> | <b>304,1,0</b> | <b>304,1,0</b>     | <b>304,1,0</b> |
| FUS        | synonymous              | *ENST00000254108,<br>ENST00000380244,<br>ENST00000568685          | c.231G>C,<br>c.228G>C,<br>c.231G>C                                              | p.(=), p.(=),<br>p.(=)                            | ,,         | ,,         | 22,10,0       | 95,122,0       | 77,140,0       | 77,140,0           | 77,140,0       |
| FUS        | missense                | *ENST00000254108,<br>ENST00000568685,<br>ENST00000380244          | c.232A>C,<br>c.232A>C,<br>c.229A>C                                              | p.Thr78Pro,<br>p.Thr78Pro,<br>p.Thr77Pro          | 0, 0,<br>0 | ,,         | 31,2,0        | 141,36,0       | 151,36,0       | 151,36,0           | 151,36,0       |
| FUS        | synonymous              | *ENST00000254108,<br>ENST00000568685,<br>ENST00000380244          | c.234T>C,<br>c.234T>C,<br>c.231T>C                                              | p.(=), p.(=),<br>p.(=)                            | ,,         | ,,         | 33,0,0        | 173,10,0       | 184,9,0        | 184,9,0            | 184,9,0        |
| FUS        | synonymous              | *ENST00000254108,<br>ENST00000568685,<br>ENST00000380244          | c.291C>T,<br>c.291C>T,<br>c.288C>T                                              | p.(=), p.(=),<br>p.(=)                            | ,,         | ,,         | 8,19,15       | 79,139,72      | 60,141,71      | 1000,2421,152<br>9 | 2398,3518,1944 |
| FUS        | synonymous              | *ENST00000254108,<br>ENST00000380244,<br>ENST00000568685          | c.339C>T,<br>c.336C>T,<br>c.339C>T                                              | p.(=), p.(=),<br>p.(=)                            | ,,         | ,,         | 49,0,0        | 318,0,0        | 277,2,0        | 277,2,0            | 277,2,0        |
| FUS        | missense                | *ENST00000254108,<br>ENST00000380244,<br>ENST00000568685          | c.422A>C,<br>c.419A>C,<br>c.422A>C                                              | p.Gln141Pro,<br>p.Gln140Pro,<br>p.Gln141Pro       | 0, 0,<br>0 | ,,         | 47,0,0        | 332,1,0        | 285,0,0        | 285,0,0            | 285,0,0        |
| FUS        | missense                | *ENST00000254108,<br>ENST00000380244,<br>ENST00000568685          | c.423A>T,<br>c.420A>T,<br>c.423A>T                                              | p.Gln141His,<br>p.Gln140His,<br>p.Gln141His       | 0, 0,<br>0 | ,,         | 47,0,0        | 332,1,0        | 286,0,0        | 286,0,0            | 286,0,0        |
| FUS        | missense                | *ENST00000254108,<br>ENST00000380244,                             | c.74A>G,<br>c.74A>G,                                                            | p.Tyr25Cys,<br>p.Tyr25Cys,                        | 1, 0,<br>1 | ,,         | 49,0,0        | 368,0,0        | 286,1,0        | 286,1,0            | 286,1,0        |

|            |                   |                                                                                                                                                                                                      |                                                                                                                      |                                                                                                   |                         |                         |               |                |                |                |                |
|------------|-------------------|------------------------------------------------------------------------------------------------------------------------------------------------------------------------------------------------------|----------------------------------------------------------------------------------------------------------------------|---------------------------------------------------------------------------------------------------|-------------------------|-------------------------|---------------|----------------|----------------|----------------|----------------|
|            |                   | ENST00000568685                                                                                                                                                                                      | c.74A>G                                                                                                              | p.Tyr25Cys                                                                                        |                         |                         |               |                |                |                |                |
| GRN        | missense          | *ENST0000053867,<br>ENST00000586443,<br>ENST00000589265                                                                                                                                              | c.1297C>T,<br>c.738C>T,<br>c.826C>T                                                                                  | p.Arg433Trp,<br>p.Arg247Trp,<br>p.Arg276Trp                                                       | 1, 1,<br>1              | 1, 1,<br>1              | 26,0,0        | 111,2,0        | 85,3,0         | 4734,32,0      | 7644,38,0      |
| <b>GRN</b> | <b>synonymous</b> | <b>*ENST0000053867,<br/>ENST00000589265</b>                                                                                                                                                          | <b>c.1695C&gt;T,<br/>c.1224C&gt;T</b>                                                                                | <b>p.(=), p.(=)</b>                                                                               | <b>,</b>                | <b>,</b>                | <b>5,0,0</b>  | <b>32,2,0</b>  | <b>24,3,0</b>  | <b>24,3,0</b>  | <b>24,3,0</b>  |
| <b>GRN</b> | <b>missense</b>   | <b>*ENST0000053867,<br/>ENST00000589265</b>                                                                                                                                                          | <b>c.1762G&gt;T,<br/>c.1291G&gt;T</b>                                                                                | <b>p.Ala588Ser,<br/>p.Ala431Ser</b>                                                               | <b>1, 1</b>             | <b>1, 1</b>             | <b>1,0,0</b>  | <b>2,1,0</b>   | <b>5,3,0</b>   | <b>5,3,0</b>   | <b>5,3,0</b>   |
| GRN        | synonymous        | *ENST0000053867,<br>ENST00000592783,<br>ENST00000591740,<br>ENST00000587518,<br>ENST00000593167,<br>ENST00000588143,<br>ENST00000589265,<br>ENST00000587387                                          | c.384T>C,<br>c.384T>C,<br>c.384T>C,<br>c.384T>C,<br>c.384T>C,<br>c.384T>C,<br>c.384T>C,<br>c.426T>C                  | p.(=), p.(=),<br>p.(=), p.(=),<br>p.(=), p.(=),<br>p.(=), p.(=)                                   | ,, ,,<br>,, ,,          | ,, ,,<br>,, ,,          | 49,1,0        | 337,16,0       | 290,13,1       | 4708,269,5     | 7455,419,24    |
| <b>GRN</b> | <b>missense</b>   | <b>*ENST0000053867,<br/>ENST00000586443,<br/>ENST00000588237</b>                                                                                                                                     | <b>c.693C&gt;G,<br/>c.134C&gt;G,<br/>c.495C&gt;G</b>                                                                 | <b>p.Cys231Trp,<br/>p.Cys45Trp,<br/>p.Cys165Trp</b>                                               | <b>1, 1,<br/>1</b>      | <b>2, 2,<br/>2</b>      | <b>40,0,0</b> | <b>229,3,0</b> | <b>207,5,0</b> | <b>207,5,0</b> | <b>207,5,0</b> |
| GRN        | synonymous        | *ENST0000053867,<br>ENST00000586443,<br>ENST00000588237                                                                                                                                              | c.705C>A,<br>c.146C>A,<br>c.507C>A                                                                                   | p.(=), p.(=),<br>p.(=)                                                                            | ,,                      | ,,                      | 37,0,0        | 232,0,0        | 206,1,0        | 4506,1,0       | 6707,3,0       |
| GRN        | missense          | *ENST0000053867,<br>ENST00000589265,<br>ENST00000586443                                                                                                                                              | c.970G>A,<br>c.499G>A,<br>c.411G>A                                                                                   | p.Ala324Thr,<br>p.Ala167Thr,<br>p.Ala138Thr                                                       | 0, 0,<br>0              | 0, 0,<br>0              | 37,0,0        | 212,1,0        | 169,2,0        | 4457,14,0      | 6654,20,0      |
| GRN        | synonymous        | *ENST0000053867,<br>ENST00000585512,<br>ENST00000589265,<br>ENST00000593167,<br>ENST00000589536,<br>ENST00000587518,<br>ENST00000587109,<br>ENST00000591740,<br>ENST00000588143,<br>ENST00000588237, | c.99C>T,<br>c.99C>T,<br>c.99C>T,<br>c.99C>T,<br>c.99C>T,<br>c.99C>T,<br>c.99C>T,<br>c.99C>T,<br>c.99C>T,<br>c.99C>T, | p.(=), p.(=),<br>p.(=), p.(=),<br>p.(=), p.(=),<br>p.(=), p.(=),<br>p.(=), p.(=),<br>p.(=), p.(=) | ,, ,,<br>,, ,,<br>,, ,, | ,, ,,<br>,, ,,<br>,, ,, | 6,0,0         | 50,4,0         | 59,2,0         | 4698,41,0      | 7612,43,0      |

|     |            |                                                                                                                                                                                                                                           |                                                                                                                                                                                   |                                                                                                                                                                        |                                                            |                                                           |               |               |               |                 |                 |
|-----|------------|-------------------------------------------------------------------------------------------------------------------------------------------------------------------------------------------------------------------------------------------|-----------------------------------------------------------------------------------------------------------------------------------------------------------------------------------|------------------------------------------------------------------------------------------------------------------------------------------------------------------------|------------------------------------------------------------|-----------------------------------------------------------|---------------|---------------|---------------|-----------------|-----------------|
|     |            | ENST00000587387,<br>ENST00000592783                                                                                                                                                                                                       | c.99C>T,<br>c.99C>T                                                                                                                                                               |                                                                                                                                                                        |                                                            |                                                           |               |               |               |                 |                 |
| HFE | synonymous | *ENST00000357618,<br>ENST00000317896,<br>ENST00000461397,<br>ENST00000309234,<br>ENST00000470149,<br>ENST00000336625                                                                                                                      | c.138G>A,<br>c.138G>A,<br>c.138G>A,<br>c.138G>A,<br>c.138G>A,<br>c.138G>A                                                                                                         | p.(=), p.(=),<br>p.(=), p.(=),<br>p.(=), p.(=)                                                                                                                         | ''''<br>,                                                  | ''''<br>,                                                 | 50,0,0        | 388,0,0       | 305,1,0       | 305,1,0         | 305,1,0         |
| HFE | missense   | *ENST00000357618,<br>ENST00000309234,<br>ENST00000336625,<br>ENST00000317896,<br>ENST00000461397,<br>ENST00000470149,<br>ENST00000397022                                                                                                  | c.157G>A,<br>c.157G>A,<br>c.157G>A,<br>c.157G>A,<br>c.157G>A,<br>c.157G>A,<br>c.88G>A                                                                                             | p.Val53Met,<br>p.Val53Met,<br>p.Val53Met,<br>p.Val53Met,<br>p.Val53Met,<br>p.Val53Met,<br>p.Val30Met                                                                   | 1, 1,<br>1, 1,<br>1, 1,<br>1                               | 1, 1,<br>0, 0,<br>1, 1,<br>2                              | 50,0,0        | 387,0,0       | 301,1,0       | 4979,1,0        | 7892,4,0        |
| HFE | missense   | *ENST00000357618,<br>ENST00000397022,<br>ENST00000309234,<br>ENST00000461397,<br>ENST00000470149,<br>ENST00000317896,<br>ENST00000336625                                                                                                  | c.187C>G,<br>c.118C>G,<br>c.187C>G,<br>c.187C>G,<br>c.187C>G,<br>c.187C>G,<br>c.187C>G                                                                                            | p.His63Asp,<br>p.His40Asp,<br>p.His63Asp,<br>p.His63Asp,<br>p.His63Asp,<br>p.His63Asp,<br>p.His63Asp                                                                   | 0, 0,<br>0, 0,<br>0, 0,<br>1                               | 0, 0,<br>0, 0,<br>0, 0,<br>0                              | 33,16,1       | 255,124,9     | 201,97,6      | 3558,1323,101   | 6275,1515,108   |
| HFE | missense   | <b>*ENST00000357618,<br/>ENST00000353147,<br/>ENST00000309234,<br/>ENST00000488199,<br/>ENST00000349999,<br/>ENST00000352392,<br/>ENST00000461397,<br/>ENST00000470149,<br/>ENST00000336625,<br/>ENST00000317896,<br/>ENST00000397022</b> | <b>c.18G&gt;C,<br/>c.18G&gt;C,<br/>c.18G&gt;C,<br/>c.18G&gt;C,<br/>c.18G&gt;C,<br/>c.18G&gt;C,<br/>c.18G&gt;C,<br/>c.18G&gt;C,<br/>c.18G&gt;C,<br/>c.18G&gt;C,<br/>c.18G&gt;C</b> | <b>p.Arg6Ser,<br/>p.Arg6Ser,<br/>p.Arg6Ser,<br/>p.Arg6Ser,<br/>p.Arg6Ser,<br/>p.Arg6Ser,<br/>p.Arg6Ser,<br/>p.Arg6Ser,<br/>p.Arg6Ser,<br/>p.Arg6Ser,<br/>p.Arg6Ser</b> | <b>0, 1,<br/>0, 1,<br/>1, 1,<br/>0, 0,<br/>1, 1,<br/>1</b> | <b>0, 1,<br/>0, 1,<br/>1, ,<br/>0, 0,<br/>1, 1,<br/>0</b> | <b>12,0,0</b> | <b>61,2,0</b> | <b>43,0,0</b> | <b>4336,6,0</b> | <b>6538,7,0</b> |
| HFE | missense   | *ENST00000357618,<br>ENST00000317896,                                                                                                                                                                                                     | c.193A>T,<br>c.193A>T,                                                                                                                                                            | p.Ser65Cys,<br>p.Ser65Cys,                                                                                                                                             | 1, 1,<br>1, 1,                                             | 2, 0,<br>2, 0,                                            | 48,2,0        | 371,16,0      | 291,13,0      | 4829,150,3      | 7728,167,3      |

|     |          |                                                                                                                                                                                                                                           |                                                                                                                                                                                   |                                                                                                                                                                                   |                                                                      |                                                           |              |               |               |                  |                  |  |
|-----|----------|-------------------------------------------------------------------------------------------------------------------------------------------------------------------------------------------------------------------------------------------|-----------------------------------------------------------------------------------------------------------------------------------------------------------------------------------|-----------------------------------------------------------------------------------------------------------------------------------------------------------------------------------|----------------------------------------------------------------------|-----------------------------------------------------------|--------------|---------------|---------------|------------------|------------------|--|
|     |          | ENST00000470149,<br>ENST00000336625,<br>ENST00000397022,<br>ENST00000309234,<br>ENST00000461397                                                                                                                                           | c.193A>T,<br>c.193A>T,<br>c.124A>T,<br>c.193A>T,<br>c.193A>T                                                                                                                      | p.Ser65Cys,<br>p.Ser65Cys,<br>p.Ser42Cys,<br>p.Ser65Cys,<br>p.Ser65Cys                                                                                                            | 1, 1,<br>1                                                           | 1, 2,<br>2                                                |              |               |               |                  |                  |  |
| HFE | missense | *ENST00000357618,<br>ENST00000488199,<br>ENST00000349999,<br>ENST00000309234,<br>ENST00000461397,<br>ENST00000470149,<br>ENST00000397022                                                                                                  | c.502G>C,<br>c.238G>C,<br>c.238G>C,<br>c.502G>C,<br>c.502G>C,<br>c.502G>C,<br>c.433G>C                                                                                            | p.Glu168Gln,<br>p.Glu80Gln,<br>p.Glu80Gln,<br>p.Glu168Gln,<br>p.Glu168Gln,<br>p.Glu168Gln,<br>p.Glu145Gln                                                                         | 1, 1,<br>1, 0,<br>1, 0,<br>1                                         | 2, 0,<br>1, 2,<br>2, 2,<br>1                              | 44,0,0       | 264,0,0       | 224,2,0       | 4897,7,0         | 7813,7,0         |  |
| HFE | missense | <b>*ENST00000357618,<br/>ENST00000349999,<br/>ENST00000309234,<br/>ENST00000353147,<br/>ENST00000461397,<br/>ENST00000470149,<br/>ENST00000488199,<br/>ENST00000352392,<br/>ENST00000317896,<br/>ENST00000397022,<br/>ENST00000336625</b> | <b>c.50C&gt;T,<br/>c.50C&gt;T,<br/>c.50C&gt;T,<br/>c.50C&gt;T,<br/>c.50C&gt;T,<br/>c.50C&gt;T,<br/>c.50C&gt;T,<br/>c.50C&gt;T,<br/>c.50C&gt;T,<br/>c.50C&gt;T,<br/>c.50C&gt;T</b> | <b>p.Thr17Ile,<br/>p.Thr17Ile,<br/>p.Thr17Ile,<br/>p.Thr17Ile,<br/>p.Thr17Ile,<br/>p.Thr17Ile,<br/>p.Thr17Ile,<br/>p.Thr17Ile,<br/>p.Thr17Ile,<br/>p.Thr17Ile,<br/>p.Thr17Ile</b> | <b>1, 1,<br/>1, 1,<br/>1, 1,<br/>1, 1,<br/>1, 1,<br/>1, 1,<br/>1</b> | <b>1, 2,<br/>1, 1,<br/>1, 1,<br/>2, ,<br/>2, 2,<br/>2</b> | <b>9,1,0</b> | <b>45,0,0</b> | <b>29,1,0</b> | <b>4317,12,0</b> | <b>6519,12,0</b> |  |
| HFE | missense | *ENST00000357618,<br>ENST00000336625,<br>ENST00000470149,<br>ENST00000317896,<br>ENST00000309234,<br>ENST00000397022,<br>ENST00000353147,<br>ENST00000488199,<br>ENST00000349999,<br>ENST00000461397                                      | c.670C>T,<br>c.352C>T,<br>c.661C>T,<br>c.394C>T,<br>c.670C>T,<br>c.601C>T,<br>c.130C>T,<br>c.364C>T,<br>c.406C>T,<br>c.628C>T                                                     | p.Arg224Trp,<br>p.Arg118Trp,<br>p.Arg221Trp,<br>p.Arg132Trp,<br>p.Arg224Trp,<br>p.Arg201Trp,<br>p.Arg44Trp,<br>p.Arg122Trp,<br>p.Arg136Trp,<br>p.Arg210Trp                        | 1, 1,<br>1, 1,<br>1, 1,<br>1, 1,<br>1, 1                             | 2, 2,<br>2, 2,<br>2, 2,<br>2, 2,<br>2, 2                  | 49,1,0       | 385,1,0       | 296,0,0       | 4593,3,0         | 6795,4,0         |  |
| HFE | missense | <b>*ENST00000357618,<br/>ENST00000317896,</b>                                                                                                                                                                                             | <b>c.68G&gt;A,<br/>c.68G&gt;A,</b>                                                                                                                                                | <b>p.Arg23His,<br/>p.Arg23His,</b>                                                                                                                                                | <b>1, 1,<br/>1, 1,</b>                                               | <b>2, 2,<br/>2, 2,</b>                                    | <b>7,1,0</b> | <b>23,0,0</b> | <b>17,0,0</b> | <b>4690,4,0</b>  | <b>7600,9,0</b>  |  |



|     |          |                                                                                                                                                                                                                                                |                                                                                                                                                                                                                         |                                                                                                                                                                                                                         |                                                          |                                                         |        |          |          |             |             |  |
|-----|----------|------------------------------------------------------------------------------------------------------------------------------------------------------------------------------------------------------------------------------------------------|-------------------------------------------------------------------------------------------------------------------------------------------------------------------------------------------------------------------------|-------------------------------------------------------------------------------------------------------------------------------------------------------------------------------------------------------------------------|----------------------------------------------------------|---------------------------------------------------------|--------|----------|----------|-------------|-------------|--|
|     |          | <i>ENST00000309234,</i><br><i>ENST00000470149,</i><br><i>ENST00000336625,</i><br><i>ENST00000397022,</i><br><i>ENST00000352392,</i><br><i>ENST00000353147,</i><br><i>ENST00000488199,</i><br><i>ENST00000349999,</i><br><i>ENST00000461397</i> | <i>c.68G&gt;A,</i><br><i>c.68G&gt;A,</i><br><i>c.68G&gt;A,</i><br><i>c.68G&gt;A,</i><br><i>c.68G&gt;A,</i><br><i>c.68G&gt;A,</i><br><i>c.68G&gt;A,</i><br><i>c.68G&gt;A,</i><br><i>c.68G&gt;A,</i><br><i>c.68G&gt;A</i> | <i>p.Arg23His,</i><br><i>p.Arg23His,</i><br><i>p.Arg23His,</i><br><i>p.Arg23His,</i><br><i>p.Arg23His,</i><br><i>p.Arg23His,</i><br><i>p.Arg23His,</i><br><i>p.Arg23His,</i><br><i>p.Arg23His,</i><br><i>p.Arg23His</i> | <i>1, 1,</i><br><i>1, 1,</i><br><i>0, 0,</i><br><i>1</i> | <i>2, 2,</i><br><i>, 1,</i><br><i>2, 1,</i><br><i>2</i> |        |          |          |             |             |  |
| HFE | missense | *ENST00000357618,<br>ENST00000353147,<br>ENST00000349999,<br>ENST00000309234,<br>ENST00000461397,<br>ENST00000488199,<br>ENST00000336625,<br>ENST00000397022,<br>ENST00000317896,<br>ENST00000470149                                           | c.766G>A,<br>c.226G>A,<br>c.502G>A,<br>c.766G>A,<br>c.724G>A,<br>c.460G>A,<br>c.448G>A,<br>c.697G>A,<br>c.490G>A,<br>c.757G>A                                                                                           | p.Val256Ile,<br>p.Val76Ile,<br>p.Val168Ile,<br>p.Val256Ile,<br>p.Val242Ile,<br>p.Val154Ile,<br>p.Val150Ile,<br>p.Val233Ile,<br>p.Val164Ile,<br>p.Val253Ile                                                              | 0, 1,<br>0, 0,<br>0, 0,<br>0, 0,<br>1, 0,<br>1, 0        | 0, 0,<br>0, 0,<br>0, 1,<br>0, 0,<br>0, 0                | 50,0,0 | 387,1,0  | 295,0,0  | 295,0,0     | 295,0,0     |  |
| HFE | missense | *ENST00000357618,<br>ENST00000349999,<br>ENST00000488199,<br>ENST00000317896,<br>ENST00000309234,<br>ENST00000470149,<br>ENST00000397022,<br>ENST00000461397,<br>ENST00000353147,<br>ENST00000336625                                           | c.829G>A,<br>c.565G>A,<br>c.523G>A,<br>c.553G>A,<br>c.829G>A,<br>c.820G>A,<br>c.760G>A,<br>c.787G>A,<br>c.289G>A,<br>c.511G>A                                                                                           | p.Glu277Lys,<br>p.Glu189Lys,<br>p.Glu175Lys,<br>p.Glu185Lys,<br>p.Glu277Lys,<br>p.Glu274Lys,<br>p.Glu254Lys,<br>p.Glu263Lys,<br>p.Glu97Lys,<br>p.Glu171Lys                                                              | 1, 1,<br>1, 1,<br>1, 1,<br>1, 1,<br>1, 1,<br>1, 1        | 2, 2,<br>2, 2,<br>2, 2,<br>2, 2,<br>2, 2                | 50,0,0 | 382,1,0  | 299,1,0  | 4970,8,0    | 7883,11,0   |  |
| HFE | missense | *ENST00000357618,<br>ENST00000488199,<br>ENST00000317896,<br>ENST00000470149,<br>ENST00000309234,<br>ENST00000349999,                                                                                                                          | c.845G>A,<br>c.539G>A,<br>c.569G>A,<br>c.836G>A,<br>c.845G>A,<br>c.581G>A,                                                                                                                                              | p.Cys282Tyr,<br>p.Cys180Tyr,<br>p.Cys190Tyr,<br>p.Cys279Tyr,<br>p.Cys282Tyr,<br>p.Cys194Tyr,                                                                                                                            | 1, 1,<br>1, 1,<br>1, 1,<br>1, 1,<br>1, 1,<br>1, 1        | 1, 2,<br>2, 1,<br>1, 1,<br>2, 1,<br>2, 2                | 42,8,0 | 302,70,3 | 234,60,7 | 4345,608,26 | 7187,681,27 |  |

|             |                                               |                                                                             |                                                 |                                                             |   |   |               |                 |                 |                    |                 |
|-------------|-----------------------------------------------|-----------------------------------------------------------------------------|-------------------------------------------------|-------------------------------------------------------------|---|---|---------------|-----------------|-----------------|--------------------|-----------------|
|             |                                               | ENST00000336625,<br>ENST00000461397,<br>ENST00000353147,<br>ENST00000397022 | c.527G>A,<br>c.803G>A,<br>c.305G>A,<br>c.776G>A | p.Cys176Tyr,<br>p.Cys268Tyr,<br>p.Cys102Tyr,<br>p.Cys259Tyr |   |   |               |                 |                 |                    |                 |
| IFNK        | missense                                      | *ENST00000276943                                                            | c.263A>G                                        | p.Tyr88Cys                                                  | 1 | 2 | 50,0,0        | 390,1,0         | 287,1,0         | 4961,5,0           | 7832,50,0       |
| IFNK        | synonymous                                    | *ENST00000276943                                                            | c.279G>A                                        | p.(=)                                                       |   |   | 50,0,0        | 391,0,0         | 287,1,0         | 287,1,0            | 287,1,0         |
| IFNK        | synonymous                                    | *ENST00000276943                                                            | c.282C>T                                        | p.(=)                                                       |   |   | 50,0,0        | 391,0,0         | 287,1,0         | 287,1,0            | 287,1,0         |
| <b>IFNK</b> | <b>feature<br/>elongation,<br/>frameshift</b> | <b>*ENST00000276943</b>                                                     | <b>c.30_31ins<br/>TGTT</b>                      | <b>p.Trp13Phefs<br/>X4</b>                                  |   |   | <b>44,6,0</b> | <b>366,21,0</b> | <b>269,14,0</b> | <b>269,14,0</b>    | <b>269,14,0</b> |
| IFNK        | missense                                      | *ENST00000276943                                                            | c.397A>G                                        | p.Lys133Glu                                                 | 0 | 0 | 0,0,49        | 0,4,386         | 0,2,274         | 0,83,4870          | 111,885,6873    |
| <b>IFNK</b> | <b>stop gained</b>                            | <b>*ENST00000276943</b>                                                     | <b>c.43G&gt;T</b>                               | <b>p.Glu15X</b>                                             |   |   | <b>46,3,0</b> | <b>330,31,0</b> | <b>205,37,0</b> | <b>205,37,0</b>    | <b>205,37,0</b> |
| IFNK        | synonymous                                    | *ENST00000276943                                                            | c.486G>C                                        | p.(=)                                                       |   |   | 49,0,0        | 385,0,0         | 280,1,0         | 280,1,0            | 280,1,0         |
| ITPR2       | stop gained                                   | *ENST00000381340                                                            | c.1318C>T                                       | p.Arg440X                                                   |   |   | 49,0,0        | 384,0,0         | 275,1,0         | 275,1,0            | 275,1,0         |
| ITPR2       | missense                                      | *ENST00000381340                                                            | c.1358C>T                                       | p.Ala453Val                                                 | 0 | 0 | 41,6,1        | 358,24,0        | 242,19,1        | 4318,413,8         | 6837,446,8      |
| ITPR2       | synonymous                                    | *ENST00000381340                                                            | c.1674C>T                                       | p.(=)                                                       |   |   | 48,0,0        | 354,2,0         | 276,1,0         | 4396,2,0           | 6289,2,0        |
| ITPR2       | synonymous                                    | *ENST00000381340                                                            | c.1857C>T                                       | p.(=)                                                       |   |   | 49,0,0        | 383,1,0         | 268,0,0         | 4702,22,0          | 7240,23,0       |
| ITPR2       | synonymous                                    | *ENST00000381340                                                            | c.1905A>G                                       | p.(=)                                                       |   |   | 34,13,1       | 254,113,13      | 177,75,7        | 3241,1332,144      | 4465,2379,406   |
| ITPR2       | synonymous                                    | *ENST00000381340                                                            | c.2016A>C                                       | p.(=)                                                       |   |   | 36,14,0       | 295,83,13       | 190,89,7        | 3294,1331,135      | 5101,1954,275   |
| ITPR2       | missense                                      | *ENST00000381340                                                            | c.2018T>C                                       | p.Met673Thr                                                 | 0 | 0 | 50,0,0        | 390,1,0         | 287,0,0         | 4382,1,0           | 6240,1,0        |
| ITPR2       | synonymous                                    | *ENST00000381340                                                            | c.2055A>G                                       | p.(=)                                                       |   |   | 15,27,8       | 183,154,51      | 113,137,33      | 1984,2198,593      | 3391,3137,860   |
| ITPR2       | synonymous                                    | *ENST00000381340                                                            | c.2262A>C                                       | p.(=)                                                       |   |   | 40,9,1        | 334,52,3        | 244,60,1        | 3989,833,50        | 6660,918,52     |
| ITPR2       | synonymous                                    | *ENST00000381340                                                            | c.2358C>T                                       | p.(=)                                                       |   |   | 36,14,0       | 284,83,12       | 196,92,7        | 3386,1347,135      | 5162,2144,306   |
| ITPR2       | synonymous                                    | *ENST00000381340                                                            | c.2694C>T                                       | p.(=)                                                       |   |   | 30,16,4       | 223,129,28      | 141,109,15      | 2689,1726,310      | 4946,1980,328   |
| ITPR2       | missense                                      | *ENST00000381340                                                            | c.2854C>T                                       | p.Pro952Ser                                                 | 0 | 0 | 48,0,0        | 304,1,0         | 274,1,0         | 4496,2,0           | 6598,2,0        |
| ITPR2       | synonymous                                    | *ENST00000381340                                                            | c.2883C>T                                       | p.(=)                                                       |   |   | 9,29,6        | 72,146,94       | 42,140,54       | 1234,2385,121<br>1 | 1857,3718,2048  |
| ITPR2       | synonymous                                    | *ENST00000381340                                                            | c.3117G>A                                       | p.(=)                                                       |   |   | 47,0,0        | 368,1,0         | 245,0,0         | 4687,2,0           | 7202,2,0        |
| ITPR2       | stop gained                                   | *ENST00000381340                                                            | c.3358C>T                                       | p.Arg1120X                                                  |   |   | 49,0,0        | 363,0,0         | 256,1,0         | 256,1,0            | 256,1,0         |
| ITPR2       | synonymous                                    | *ENST00000381340                                                            | c.3369A>G                                       | p.(=)                                                       |   |   | 50,0,0        | 369,10,0        | 267,8,0         | 4629,150,1         | 7222,159,1      |
| ITPR2       | missense                                      | *ENST00000381340                                                            | c.3485T>G                                       | p.Val1162Gly                                                | 0 | 0 | 44,1,0        | 354,1,0         | 249,0,0         | 4335,10,0          | 6173,12,0       |
| ITPR2       | missense                                      | *ENST00000381340                                                            | c.3539G>A                                       | p.Arg1180Gln                                                | 0 | 0 | 45,2,0        | 341,5,0         | 230,2,0         | 4631,68,0          | 7164,78,0       |
| ITPR2       | missense                                      | *ENST00000381340                                                            | c.3614G>A                                       | p.Arg1205Gln                                                | 0 | 2 | 50,0,0        | 370,1,0         | 266,0,0         | 266,0,0            | 266,0,0         |
| ITPR2       | missense                                      | *ENST00000381340                                                            | c.3635C>T                                       | p.Ala1212Val                                                | 0 | 1 | 50,0,0        | 373,0,0         | 261,3,0         | 261,3,0            | 261,3,0         |

|              |                              |                                                                              |                                                     |                                                             |               |               |               |                |                |                    |                |
|--------------|------------------------------|------------------------------------------------------------------------------|-----------------------------------------------------|-------------------------------------------------------------|---------------|---------------|---------------|----------------|----------------|--------------------|----------------|
| ITPR2        | missense                     | *ENST00000381340                                                             | c.3824G>A                                           | p.Arg1275Gln                                                | 0             | 0             | 47,1,0        | 367,3,0        | 256,9,0        | 4771,51,0          | 7458,55,0      |
| ITPR2        | synonymous                   | *ENST00000381340                                                             | c.4023C>T                                           | p.(=)                                                       |               |               | 50,0,0        | 388,1,0        | 293,0,0        | 293,0,0            | 293,0,0        |
| ITPR2        | synonymous                   | *ENST00000381340                                                             | c.4125C>T                                           | p.(=)                                                       |               |               | 49,1,0        | 355,32,3       | 278,21,1       | 4596,244,6         | 7288,272,6     |
| ITPR2        | synonymous                   | *ENST00000381340                                                             | c.4239C>T                                           | p.(=)                                                       |               |               | 16,29,4       | 139,183,49     | 105,133,31     | 2087,2179,577      | 4220,2762,624  |
| <b>ITPR2</b> | <b>synonymous</b>            | <b>*ENST00000381340</b>                                                      | <b>c.4305A&gt;G</b>                                 | <b>p.(=)</b>                                                |               |               | <b>48,0,0</b> | <b>377,1,0</b> | <b>248,0,0</b> | <b>248,0,0</b>     | <b>248,0,0</b> |
| ITPR2        | synonymous                   | *ENST00000381340                                                             | c.4407A>G                                           | p.(=)                                                       |               |               | 17,29,3       | 144,186,50     | 106,126,27     | 2044,2124,557      | 3976,2691,598  |
| ITPR2        | synonymous                   | *ENST00000381340                                                             | c.4482C>T                                           | p.(=)                                                       |               |               | 18,28,2       | 151,175,43     | 106,122,25     | 2194,2023,490      | 4106,2590,532  |
| ITPR2        | splice region,<br>synonymous | *ENST00000381340                                                             | c.4962G>A                                           | p.(=)                                                       |               |               | 50,0,0        | 383,5,0        | 283,1,0        | 4804,34,1          | 7511,39,1      |
| ITPR2        | synonymous                   | *ENST00000381340                                                             | c.5118T>C                                           | p.(=)                                                       |               |               | 48,0,0        | 367,1,0        | 256,0,0        | 256,0,0            | 256,0,0        |
| ITPR2        | synonymous                   | *ENST00000381340                                                             | c.5175G>A                                           | p.(=)                                                       |               |               | 27,19,3       | 227,129,14     | 166,81,12      | 2888,1631,230      | 5279,1829,234  |
| ITPR2        | synonymous                   | *ENST00000381340                                                             | c.5331C>T                                           | p.(=)                                                       |               |               | 49,0,0        | 379,0,0        | 263,1,0        | 4360,2,0           | 6211,2,0       |
| ITPR2        | synonymous                   | *ENST00000381340                                                             | c.5569C>T                                           | p.(=)                                                       |               |               | 50,0,0        | 384,1,0        | 255,3,0        | 4698,18,0          | 7239,19,0      |
| <b>ITPR2</b> | <b>synonymous</b>            | <b>*ENST00000381340</b>                                                      | <b>c.570G&gt;C</b>                                  | <b>p.(=)</b>                                                |               |               | <b>48,0,0</b> | <b>382,1,0</b> | <b>281,3,0</b> | <b>281,3,0</b>     | <b>281,3,0</b> |
| ITPR2        | missense                     | *ENST00000381340                                                             | c.6022G>A                                           | p.Ala2008Thr                                                | 1             | 2             | 46,0,0        | 350,1,0        | 203,5,0        | 4302,6,0           | 6152,6,0       |
| <b>ITPR2</b> | <b>missense</b>              | <b>*ENST00000381340</b>                                                      | <b>c.6346G&gt;C</b>                                 | <b>p.Ala2116Pro</b>                                         | <b>1</b>      | <b>2</b>      | <b>48,1,0</b> | <b>375,5,0</b> | <b>263,4,0</b> | <b>263,4,0</b>     | <b>263,4,0</b> |
| ITPR2        | missense                     | *ENST00000381340                                                             | c.6389C>T                                           | p.Ser2130Leu                                                | 0             | 0             | 50,0,0        | 386,1,0        | 282,0,0        | 4404,1,0           | 6326,1,0       |
| ITPR2        | synonymous                   | *ENST00000381340                                                             | c.6390G>A                                           | p.(=)                                                       |               |               | 50,0,0        | 378,1,0        | 277,0,0        | 4402,1,0           | 6329,1,0       |
| ITPR2        | missense                     | *ENST00000381340                                                             | c.6529A>C                                           | p.Lys2177Gln                                                | 1             | 0             | 50,0,0        | 390,0,0        | 278,1,0        | 4383,7,0           | 6242,7,0       |
| ITPR2        | missense                     | *ENST00000381340                                                             | c.6833T>C                                           | p.Leu2278Pro                                                | 1             | 1             | 49,1,0        | 383,0,0        | 281,1,0        | 4757,2,0           | 7318,3,0       |
| ITPR2        | synonymous                   | *ENST00000381340                                                             | c.6966T>C                                           | p.(=)                                                       |               |               | 50,0,0        | 388,3,0        | 302,2,0        | 4420,5,0           | 6317,5,0       |
| ITPR2        | splice region,<br>synonymous | *ENST00000381340                                                             | c.7401T>G                                           | p.(=)                                                       |               |               | 50,0,0        | 376,0,0        | 277,2,0        | 4357,3,0           | 6193,3,0       |
| <b>ITPR2</b> | <b>synonymous</b>            | <b>*ENST00000381340</b>                                                      | <b>c.7518G&gt;A</b>                                 | <b>p.(=)</b>                                                |               |               | <b>48,0,0</b> | <b>377,0,0</b> | <b>286,1,0</b> | <b>286,1,0</b>     | <b>286,1,0</b> |
| ITPR2        | synonymous                   | *ENST00000381340                                                             | c.765A>G                                            | p.(=)                                                       |               |               | 8,32,10       | 120,175,94     | 76,152,55      | 1341,2380,105<br>5 | 3448,2822,1098 |
| ITPR2        | synonymous                   | *ENST00000381340                                                             | c.798G>A                                            | p.(=)                                                       |               |               | 47,2,0        | 346,30,3       | 255,13,0       | 4573,176,1         | 6327,896,117   |
| ITPR2        | missense                     | *ENST00000381340                                                             | c.8002G>A                                           | p.Ala2668Thr                                                | 0             | 0             | 48,0,0        | 356,5,0        | 287,3,0        | 4884,28,0          | 7671,33,0      |
| MAPT         | missense                     | *ENST00000344290,<br>ENST00000262410,<br>ENST00000415613,<br>ENST00000571987 | c.1108C>T,<br>c.1108C>T,<br>c.1108C>T,<br>c.1108C>T | p.Arg370Trp,<br>p.Arg370Trp,<br>p.Arg370Trp,<br>p.Arg370Trp | 1, 1,<br>1, 1 | 2, 1,<br>2, 1 | 2,2,1         | 28,37,5        | 24,44,9        | 2730,1552,217      | 5265,1777,229  |
| MAPT         | missense                     | *ENST00000344290,<br>ENST00000415613,                                        | c.1280C>T,<br>c.1280C>T,                            | p.Ser427Phe,<br>p.Ser427Phe,                                | 1, 1,<br>1, 1 | 2, 2,<br>2, 2 | 50,0,0        | 388,3,0        | 303,4,0        | 4962,23,0          | 7874,27,0      |

|             |                 |                                                                                                                                                                                                                                                                                                          |                                                                                                                                                                                                                                                            |                                                                                                                                                                                                                                             |                                                                                                                 |                                                                         |               |                |                |                  |                  |                |
|-------------|-----------------|----------------------------------------------------------------------------------------------------------------------------------------------------------------------------------------------------------------------------------------------------------------------------------------------------------|------------------------------------------------------------------------------------------------------------------------------------------------------------------------------------------------------------------------------------------------------------|---------------------------------------------------------------------------------------------------------------------------------------------------------------------------------------------------------------------------------------------|-----------------------------------------------------------------------------------------------------------------|-------------------------------------------------------------------------|---------------|----------------|----------------|------------------|------------------|----------------|
|             |                 | ENST00000571987,<br>ENST00000262410                                                                                                                                                                                                                                                                      | c.1280C>T,<br>c.1280C>T                                                                                                                                                                                                                                    | p.Ser427Phe,<br>p.Ser427Phe                                                                                                                                                                                                                 |                                                                                                                 |                                                                         |               |                |                |                  |                  |                |
| <b>MAPT</b> | <b>missense</b> | <b>*ENST00000344290,<br/>ENST00000415613,<br/>ENST00000262410,<br/>ENST00000571987</b>                                                                                                                                                                                                                   | <b>c.1306C&gt;A,<br/>c.1306C&gt;A,<br/>c.1306C&gt;A,<br/>c.1306C&gt;A</b>                                                                                                                                                                                  | <b>p.Pro436Thr,<br/>p.Pro436Thr,<br/>p.Pro436Thr,<br/>p.Pro436Thr</b>                                                                                                                                                                       | <b>0, 0,<br/>0, 0</b>                                                                                           | <b>0, 0,<br/>0, 0</b>                                                   | <b>50,0,0</b> | <b>390,0,0</b> | <b>306,1,0</b> | <b>306,1,0</b>   | <b>306,1,0</b>   | <b>306,1,0</b> |
| MAPT        | missense        | *ENST00000344290,<br>ENST00000571987,<br>ENST00000415613,<br>ENST00000262410                                                                                                                                                                                                                             | c.1321T>C,<br>c.1321T>C,<br>c.1321T>C,<br>c.1321T>C                                                                                                                                                                                                        | p.Tyr441His,<br>p.Tyr441His,<br>p.Tyr441His,<br>p.Tyr441His                                                                                                                                                                                 | 0, 0,<br>0, 0                                                                                                   | 0, 0,<br>0, 0                                                           | 37,12,1       | 257,126,8      | 210,87,9       | 3204,1578,202    | 5108,2414,378    |                |
| MAPT        | missense        | *ENST00000344290,<br>ENST00000571987,<br>ENST00000415613,<br>ENST00000262410                                                                                                                                                                                                                             | c.1339T>C,<br>c.1339T>C,<br>c.1339T>C,<br>c.1339T>C                                                                                                                                                                                                        | p.Ser447Pro,<br>p.Ser447Pro,<br>p.Ser447Pro,<br>p.Ser447Pro                                                                                                                                                                                 | 0, 0,<br>0, 0                                                                                                   | 0, 0,<br>0, 0                                                           | 36,12,2       | 250,123,18     | 190,105,12     | 3019,1712,254    | 5642,1992,267    |                |
| <b>MAPT</b> | <b>missense</b> | <b>*ENST00000344290,<br/>ENST00000415613,<br/>ENST00000351559,<br/>ENST00000340799,<br/>ENST00000571987,<br/>ENST00000420682,<br/>ENST00000574436,<br/>ENST00000576518,<br/>ENST00000431008,<br/>ENST00000446361,<br/>ENST00000347967,<br/>ENST00000535772,<br/>ENST00000334239,<br/>ENST00000262410</b> | <b>c.1405G&gt;A<br/>,<br/>c.1405G&gt;A<br/>, c.454G&gt;A,<br/>c.367G&gt;A,<br/>c.1405G&gt;A<br/>, c.367G&gt;A,<br/>c.454G&gt;A,<br/>c.247G&gt;A,<br/>c.454G&gt;A,<br/>c.280G&gt;A,<br/>c.172G&gt;A,<br/>c.454G&gt;A,<br/>c.280G&gt;A,<br/>c.1405G&gt;A</b> | <b>p.Ala469Thr,<br/>p.Ala469Thr,<br/>p.Ala152Thr,<br/>p.Ala123Thr,<br/>p.Ala469Thr,<br/>p.Ala123Thr,<br/>p.Ala152Thr,<br/>p.Ala83Thr,<br/>p.Ala152Thr,<br/>p.Ala94Thr,<br/>p.Ala58Thr,<br/>p.Ala152Thr,<br/>p.Ala94Thr,<br/>p.Ala469Thr</b> | <b>0, 0,<br/>0, 0</b> | <b>0, 0,<br/>0, 0,<br/>0, 0,<br/>0, 1,<br/>0, 0,<br/>1, 0,<br/>0, 0</b> | <b>3,0,0</b>  | <b>36,2,0</b>  | <b>27,0,0</b>  | <b>4679,25,1</b> | <b>7591,29,1</b> |                |
| MAPT        | synonymous      | *ENST00000344290,<br>ENST00000576518,<br>ENST00000347967,<br>ENST00000574436,<br>ENST00000420682,<br>ENST00000334239,                                                                                                                                                                                    | c.1479G>A,<br>c.321G>A,<br>c.246G>A,<br>c.528G>A,<br>c.441G>A,<br>c.354G>A,                                                                                                                                                                                | p.(=), p.(=),<br>p.(=), p.(=),<br>p.(=), p.(=),<br>p.(=), p.(=),<br>p.(=), p.(=),                                                                                                                                                           | ,, , , ,<br>,, , , ,<br>,, , , ,<br>,, , , ,<br>, ,                                                             | ,, , , ,<br>,, , , ,<br>,, , , ,<br>,, , , ,<br>, ,                     | 4,6,1         | 37,62,4        | 37,50,8        | 2856,1667,250    | 5518,1910,261    |                |

|      |            |                                                                                                                                                                                                                                                                                      |                                                                                                                                                                                       |                                                                                                                                                                              |       |       |         |           |           |               |               |
|------|------------|--------------------------------------------------------------------------------------------------------------------------------------------------------------------------------------------------------------------------------------------------------------------------------------|---------------------------------------------------------------------------------------------------------------------------------------------------------------------------------------|------------------------------------------------------------------------------------------------------------------------------------------------------------------------------|-------|-------|---------|-----------|-----------|---------------|---------------|
|      |            | ENST00000535772,<br>ENST00000262410,<br>ENST00000431008,<br>ENST00000446361,<br>ENST00000351559,<br>ENST00000571987,<br>ENST00000415613,<br>ENST00000340799                                                                                                                          | c.528G>A,<br>c.1479G>A,<br>c.528G>A,<br>c.354G>A,<br>c.528G>A,<br>c.1479G>A,<br>c.1479G>A,<br>c.1479G>A,<br>c.441G>A                                                                  | p.(=), p.(=)                                                                                                                                                                 |       |       |         |           |           |               |               |
| MAPT | synonymous | *ENST00000344290,<br>ENST00000415613                                                                                                                                                                                                                                                 | c.1512T>C,<br>c.1512T>C                                                                                                                                                               | p.(=), p.(=)                                                                                                                                                                 | ,     | ,     | 27,12,1 | 154,91,12 | 146,93,10 | 2556,1434,215 | 4607,1643,228 |
| MAPT | synonymous | *ENST00000344290,<br>ENST00000571987,<br>ENST00000351559,<br>ENST00000340799,<br>ENST00000415613,<br>ENST00000334239,<br>ENST00000431008,<br>ENST00000446361,<br>ENST00000576518,<br>ENST00000262410,<br>ENST00000574436,<br>ENST00000347967,<br>ENST00000420682,<br>ENST00000535772 | c.1686A>G,<br>c.1632A>G,<br>c.681A>G,<br>c.594A>G,<br>c.1686A>G,<br>c.507A>G,<br>c.681A>G,<br>c.507A>G,<br>c.474A>G,<br>c.1632A>G,<br>c.681A>G,<br>c.399A>G,<br>c.594A>G,<br>c.681A>G | p.(=), p.(=),<br>p.(=), p.(=),<br>p.(=), p.(=),<br>p.(=), p.(=),<br>p.(=), p.(=),<br>p.(=), p.(=),<br>p.(=), p.(=)                                                           | ''''  | ''''  | 9,7,0   | 57,31,1   | 52,24,3   | 2892,1625,240 | 5508,1912,253 |
| MAPT | missense   | *ENST00000344290,<br>ENST00000347967,<br>ENST00000420682,<br>ENST00000571987,<br>ENST00000334239,<br>ENST00000415613,<br>ENST00000351559,<br>ENST00000262410,<br>ENST00000446361,<br>ENST00000431008,<br>ENST00000340799,                                                            | c.1720G>A,<br>c.433G>A,<br>c.628G>A,<br>c.1666G>A,<br>c.541G>A,<br>c.1720G>A,<br>c.715G>A,<br>c.1666G>A,<br>c.541G>A,<br>c.715G>A,<br>c.628G>A,                                       | p.Ala574Thr,<br>p.Ala145Thr,<br>p.Ala210Thr,<br>p.Ala556Thr,<br>p.Ala181Thr,<br>p.Ala574Thr,<br>p.Ala239Thr,<br>p.Ala556Thr,<br>p.Ala181Thr,<br>p.Ala239Thr,<br>p.Ala210Thr, | 0, 0, | 0, 0, | 18,0,0  | 92,2,0    | 66,0,0    | 4354,12,0     | 6551,18,0     |

|      |            |                                                                                                                                                                                                                                                                                      |                                                                                                                                                                                       |                                                                                                                    |      |      |        |         |         |               |               |  |
|------|------------|--------------------------------------------------------------------------------------------------------------------------------------------------------------------------------------------------------------------------------------------------------------------------------------|---------------------------------------------------------------------------------------------------------------------------------------------------------------------------------------|--------------------------------------------------------------------------------------------------------------------|------|------|--------|---------|---------|---------------|---------------|--|
|      |            | ENST00000535772,<br>ENST00000576518,<br>ENST00000574436                                                                                                                                                                                                                              | c.715G>A,<br>c.508G>A,<br>c.715G>A                                                                                                                                                    | p.Ala239Thr,<br>p.Ala170Thr,<br>p.Ala239Thr                                                                        |      |      |        |         |         |               |               |  |
| MAPT | synonymous | *ENST00000344290,<br>ENST00000351559,<br>ENST00000446361,<br>ENST00000535772,<br>ENST00000340799,<br>ENST00000334239,<br>ENST00000574436,<br>ENST00000262410,<br>ENST00000576518,<br>ENST00000431008,<br>ENST00000347967,<br>ENST00000571987,<br>ENST00000420682,<br>ENST00000415613 | c.1770T>C,<br>c.765T>C,<br>c.591T>C,<br>c.765T>C,<br>c.678T>C,<br>c.591T>C,<br>c.765T>C,<br>c.1716T>C,<br>c.558T>C,<br>c.765T>C,<br>c.483T>C,<br>c.1716T>C,<br>c.678T>C,<br>c.1770T>C | p.(=), p.(=),<br>p.(=), p.(=),<br>p.(=), p.(=),<br>p.(=), p.(=),<br>p.(=), p.(=),<br>p.(=), p.(=),<br>p.(=), p.(=) | '''' | '''' | 16,5,2 | 75,60,5 | 66,52,2 | 2887,1667,244 | 5509,1948,257 |  |
| MAPT | synonymous | *ENST00000344290,<br>ENST00000446361,<br>ENST00000574436,<br>ENST00000351559,<br>ENST00000571987,<br>ENST00000334239,<br>ENST00000420682,<br>ENST00000347967,<br>ENST00000340799,<br>ENST00000576518,<br>ENST00000535772,<br>ENST00000431008,<br>ENST00000415613,<br>ENST00000262410 | c.1815G>A,<br>c.636G>A,<br>c.810G>A,<br>c.810G>A,<br>c.1761G>A,<br>c.636G>A,<br>c.723G>A,<br>c.528G>A,<br>c.723G>A,<br>c.603G>A,<br>c.810G>A,<br>c.810G>A,<br>c.1815G>A,<br>c.1761G>A | p.(=), p.(=),<br>p.(=), p.(=),<br>p.(=), p.(=),<br>p.(=), p.(=),<br>p.(=), p.(=),<br>p.(=), p.(=)                  | '''' | '''' | 8,3,0  | 69,16,0 | 55,8,0  | 4319,414,8    | 7017,631,9    |  |
| MAPT | synonymous | *ENST00000344290,<br>ENST00000446361,<br>ENST00000571987,<br>ENST00000420682,                                                                                                                                                                                                        | c.2178G>A,<br>c.999G>A,<br>c.2124G>A,<br>c.1086G>A,                                                                                                                                   | p.(=), p.(=),<br>p.(=), p.(=),<br>p.(=), p.(=),<br>p.(=), p.(=),                                                   | '''' | '''' | 45,0,0 | 325,1,0 | 287,1,0 | 4585,3,0      | 6788,3,0      |  |

|             |                 |                                                                                                                                                                                                     |                                                                                                                                      |                                                                                                                     |                                          |                                 |              |              |               |                      |                      |  |
|-------------|-----------------|-----------------------------------------------------------------------------------------------------------------------------------------------------------------------------------------------------|--------------------------------------------------------------------------------------------------------------------------------------|---------------------------------------------------------------------------------------------------------------------|------------------------------------------|---------------------------------|--------------|--------------|---------------|----------------------|----------------------|--|
|             |                 | ENST00000334239,<br>ENST00000535772,<br>ENST00000576518,<br>ENST00000415613,<br>ENST00000340799,<br>ENST00000351559,<br>ENST00000431008,<br>ENST00000347967,<br>ENST00000262410,<br>ENST00000574436 | c.906G>A,<br>c.1080G>A,<br>c.873G>A,<br>c.2178G>A,<br>c.1086G>A,<br>c.1173G>A,<br>c.1080G>A,<br>c.798G>A,<br>c.2124G>A,<br>c.1173G>A | p.(=), p.(=),<br>p.(=), p.(=),<br>p.(=), p.(=)                                                                      |                                          |                                 |              |              |               |                      |                      |  |
| MAPT        | missense        | *ENST00000344290,<br>ENST00000431008,<br>ENST00000262410,<br>ENST00000571987,<br>ENST00000535772,<br>ENST00000574436,<br>ENST00000351559,<br>ENST00000415613                                        | c.284C>T,<br>c.284C>T,<br>c.284C>T,<br>c.284C>T,<br>c.284C>T,<br>c.284C>T,<br>c.284C>T,<br>c.284C>T                                  | p.Thr95Met,<br>p.Thr95Met,<br>p.Thr95Met,<br>p.Thr95Met,<br>p.Thr95Met,<br>p.Thr95Met,<br>p.Thr95Met,<br>p.Thr95Met | 0, 0,<br>0, 0,<br>0, 0,<br>0, 0,<br>0, 0 | 0, 0,<br>0, 0,<br>0, 0,<br>0, 0 | 10,0,0       | 49,1,0       | 50,0,0        | 4348,1,0             | 6548,1,0             |  |
| <b>MAPT</b> | <b>missense</b> | <b>*ENST00000344290,<br/>ENST00000415613,<br/>ENST00000571987,<br/>ENST00000262410</b>                                                                                                              | <b>c.605C&gt;T,<br/>c.605C&gt;T,<br/>c.605C&gt;T,<br/>c.605C&gt;T</b>                                                                | <b>p.Pro202Leu,<br/>p.Pro202Leu,<br/>p.Pro202Leu,<br/>p.Pro202Leu</b>                                               | <b>0, 0,<br/>0, 0</b>                    | <b>1, 1,<br/>1, 1</b>           | <b>0,2,0</b> | <b>0,8,1</b> | <b>7,12,1</b> | <b>2822,1566,254</b> | <b>5405,1839,268</b> |  |
| MAPT        | missense        | *ENST00000344290,<br>ENST00000262410,<br>ENST00000415613,<br>ENST00000571987                                                                                                                        | c.671T>G,<br>c.671T>G,<br>c.671T>G,<br>c.671T>G                                                                                      | p.Val224Gly,<br>p.Val224Gly,<br>p.Val224Gly,<br>p.Val224Gly                                                         | 1, 1,<br>1, 1                            | 1, 0,<br>1, 0                   | 8,0,0        | 52,0,0       | 47,1,0        | 4684,39,0            | 7593,43,0            |  |
| MAPT        | missense        | *ENST00000344290,<br>ENST00000415613,<br>ENST00000262410,<br>ENST00000571987                                                                                                                        | c.689A>G,<br>c.689A>G,<br>c.689A>G,<br>c.689A>G                                                                                      | p.Gln230Arg,<br>p.Gln230Arg,<br>p.Gln230Arg,<br>p.Gln230Arg                                                         | 1, 1,<br>1, 1                            | 0, 0,<br>2, 2                   | 9,3,0        | 71,9,0       | 63,6,1        | 4218,495,9           | 7028,586,11          |  |
| MAPT        | missense        | *ENST00000344290,<br>ENST00000262410,<br>ENST00000415613,<br>ENST00000571987                                                                                                                        | c.698C>T,<br>c.698C>T,<br>c.698C>T,<br>c.698C>T                                                                                      | p.Pro233Leu,<br>p.Pro233Leu,<br>p.Pro233Leu,<br>p.Pro233Leu                                                         | 0, 0,<br>0, 0                            | 2, 0,<br>2, 0                   | 14,0,0       | 78,1,0       | 80,0,0        | 80,0,0               | 80,0,0               |  |
| MAPT        | stop gained     | *, ENST00000576518                                                                                                                                                                                  | c.7A>T                                                                                                                               | p.Lys3X                                                                                                             |                                          |                                 | 26,10,1      | 154,88,12    | 126,75,9      | 352,205,31           | 991,272,38           |  |

|             |                                               |                                                                              |                                                 |                                                             |               |               |                |                  |                  |                  |                  |
|-------------|-----------------------------------------------|------------------------------------------------------------------------------|-------------------------------------------------|-------------------------------------------------------------|---------------|---------------|----------------|------------------|------------------|------------------|------------------|
| MAPT        | missense                                      | *ENST00000344290,<br>ENST00000571987,<br>ENST00000262410,<br>ENST00000415613 | c.853G>A,<br>c.853G>A,<br>c.853G>A,<br>c.853G>A | p.Asp285Asn,<br>p.Asp285Asn,<br>p.Asp285Asn,<br>p.Asp285Asn | 0, 0,<br>0, 0 | 0, 0,<br>0, 0 | 20,9,2         | 120,70,13        | 91,68,12         | 2910,1684,255    | 5532,1963,270    |
| MAPT        | synonymous                                    | *ENST00000344290,<br>ENST00000262410,<br>ENST00000571987,<br>ENST00000415613 | c.855C>T,<br>c.855C>T,<br>c.855C>T,<br>c.855C>T | p.(=), p.(=),<br>p.(=), p.(=)                               | , , ,         | , , ,         | 27,7,0         | 147,48,2         | 125,45,5         | 3756,1021,76     | 6277,1393,99     |
| MAPT        | missense                                      | *ENST00000344290,<br>ENST00000415613,<br>ENST00000262410,<br>ENST00000571987 | c.866T>C,<br>c.866T>C,<br>c.866T>C,<br>c.866T>C | p.Val289Ala,<br>p.Val289Ala,<br>p.Val289Ala,<br>p.Val289Ala | 0, 0,<br>0, 0 | 0, 0,<br>0, 0 | 24,9,2         | 124,74,14        | 119,80,11        | 2938,1696,254    | 5560,1976,268    |
| MOB3B       | synonymous                                    | *ENST00000262244                                                             | c.414C>T                                        | p.(=)                                                       |               |               | 28,19,3        | 243,128,12       | 195,84,13        | 3304,1488,178    | 5880,1815,191    |
| MOB3B       | synonymous                                    | *ENST00000262244                                                             | c.615G>A                                        | p.(=)                                                       |               |               | 50,0,0         | 390,0,0          | 303,1,0          | 303,1,0          | 303,1,0          |
| MOB3B       | missense                                      | *ENST00000262244                                                             | c.98G>A                                         | p.Arg33Gln                                                  | 0             | 0             | 50,0,0         | 354,0,0          | 277,1,0          | 277,1,0          | 277,1,0          |
| NEFH        | missense                                      | *ENST00000310624                                                             | c.1054C>A                                       | p.Arg352Ser                                                 | 1             |               | 31,0,0         | 184,2,0          | 142,10,0         | 4778,52,0        | 7687,59,0        |
| NEFH        | missense                                      | *ENST00000310624                                                             | c.1105G>A                                       | p.Ala369Thr                                                 | 0             |               | 43,0,0         | 254,0,0          | 175,3,0          | 175,3,0          | 175,3,0          |
| NEFH        | synonymous                                    | *ENST00000310624                                                             | c.1200C>T                                       | p.(=)                                                       |               |               | 28,16,0        | 172,91,7         | 125,62,18        | 3464,1310,109    | 6039,1631,129    |
| NEFH        | missense                                      | *ENST00000310624                                                             | c.1387G>A                                       | p.Glu463Lys                                                 | 0             |               | 45,5,0         | 324,52,3         | 244,45,1         | 4066,852,50      | 6892,940,52      |
| NEFH        | missense                                      | *ENST00000310624                                                             | c.1580C>T                                       | p.Pro527Leu                                                 | 0             |               | 47,0,0         | 354,1,0          | 279,2,0          | 279,2,0          | 279,2,0          |
| NEFH        | synonymous                                    | *ENST00000310624                                                             | c.1740C>T                                       | p.(=)                                                       |               |               | 50,0,0         | 370,6,0          | 291,8,0          | 4857,119,1       | 7763,129,1       |
| NEFH        | missense                                      | *ENST00000310624                                                             | c.1844C>T                                       | p.Pro615Leu                                                 | 1             | 2             | 30,17,2        | 217,147,12       | 170,109,13       | 3028,1715,227    | 5081,2490,315    |
| <b>NEFH</b> | <b>missense</b>                               | <b>*ENST00000310624</b>                                                      | <b>c.1933G&gt;A</b>                             | <b>p.Glu645Lys</b>                                          | <b>0</b>      | <b>2</b>      | <b>41,2,0</b>  | <b>314,30,0</b>  | <b>253,10,0</b>  | <b>253,10,0</b>  | <b>253,10,0</b>  |
| <b>NEFH</b> | <b>feature<br/>elongation,<br/>frameshift</b> | <b>*ENST00000310624</b>                                                      | <b>c.1935_19<br/>36insG</b>                     | <b>p.Ala646Glyf<br/>sX5</b>                                 |               |               | <b>34,9,0</b>  | <b>237,63,0</b>  | <b>198,44,0</b>  | <b>198,44,0</b>  | <b>198,44,0</b>  |
| <b>NEFH</b> | <b>synonymous</b>                             | <b>*ENST00000310624</b>                                                      | <b>c.1935A&gt;G</b>                             | <b>p.(=)</b>                                                |               |               | <b>39,5,0</b>  | <b>292,41,0</b>  | <b>246,21,0</b>  | <b>246,21,0</b>  | <b>246,21,0</b>  |
| <b>NEFH</b> | <b>synonymous</b>                             | <b>*ENST00000310624</b>                                                      | <b>c.1938A&gt;C</b>                             | <b>p.(=)</b>                                                |               |               | <b>27,18,0</b> | <b>163,147,0</b> | <b>137,115,0</b> | <b>137,115,0</b> | <b>137,115,0</b> |
| <b>NEFH</b> | <b>synonymous</b>                             | <b>*ENST00000310624</b>                                                      | <b>c.1965A&gt;T</b>                             | <b>p.(=)</b>                                                |               |               | <b>16,29,0</b> | <b>118,206,0</b> | <b>129,125,0</b> | <b>129,125,0</b> | <b>129,125,0</b> |
| <b>NEFH</b> | <b>inframe<br/>deletion</b>                   | <b>*ENST00000310624</b>                                                      | <b>c.1970_19<br/>75delAGG<br/>AAG</b>           | <b>p.Glu658_Glu<br/>659del</b>                              |               |               | <b>24,23,0</b> | <b>189,148,0</b> | <b>187,79,0</b>  | <b>187,79,0</b>  | <b>187,79,0</b>  |
| <b>NEFH</b> | <b>missense</b>                               | <b>*ENST00000310624</b>                                                      | <b>c.1973A&gt;C</b>                             | <b>p.Glu658Ala</b>                                          | <b>0</b>      | <b>0</b>      | <b>40,1,0</b>  | <b>298,26,0</b>  | <b>227,32,0</b>  | <b>227,32,0</b>  | <b>227,32,0</b>  |
| <b>NEFH</b> | <b>missense</b>                               | <b>*ENST00000310624</b>                                                      | <b>c.1974A&gt;C</b>                             | <b>p.Glu658Asp</b>                                          | <b>0</b>      | <b>2</b>      | <b>45,1,0</b>  | <b>323,15,0</b>  | <b>248,14,0</b>  | <b>248,14,0</b>  | <b>248,14,0</b>  |
| <b>NEFH</b> | <b>missense</b>                               | <b>*ENST00000310624</b>                                                      | <b>c.1975G&gt;A</b>                             | <b>p.Glu659Lys</b>                                          | <b>0</b>      | <b>2</b>      | <b>46,1,0</b>  | <b>325,12,0</b>  | <b>258,11,0</b>  | <b>258,11,0</b>  | <b>258,11,0</b>  |



|              |                         |                                                                                                       |                                                                  |                                                                              |                  |                  |               |                 |                 |                 |                 |
|--------------|-------------------------|-------------------------------------------------------------------------------------------------------|------------------------------------------------------------------|------------------------------------------------------------------------------|------------------|------------------|---------------|-----------------|-----------------|-----------------|-----------------|
| <b>NEFH</b>  | <b>synonymous</b>       | <b>*ENST00000310624</b>                                                                               | <b>c.1989T&gt;A</b>                                              | <b>p.(=)</b>                                                                 |                  |                  | <b>43,2,0</b> | <b>332,22,0</b> | <b>300,0,0</b>  | <b>300,0,0</b>  | <b>300,0,0</b>  |
| <b>NEFH</b>  | <b>synonymous</b>       | <b>*ENST00000310624</b>                                                                               | <b>c.2082C&gt;T</b>                                              | <b>p.(=)</b>                                                                 |                  |                  | <b>47,0,0</b> | <b>330,0,1</b>  | <b>304,0,0</b>  | <b>304,0,0</b>  | <b>304,0,0</b>  |
| NEFH         | synonymous              | *ENST00000310624                                                                                      | c.2232T>C                                                        | p.(=)                                                                        |                  |                  | 2,18,29       | 14,145,216      | 12,107,179      | 230,1711,3035   | 321,2459,5112   |
| <b>NEFH</b>  | <b>inframe deletion</b> | <b>*ENST00000310624</b>                                                                               | <b>c.2368_2370delAAG</b>                                         | <b>p.Lys790del</b>                                                           |                  |                  | <b>48,0,0</b> | <b>324,1,0</b>  | <b>278,0,0</b>  | <b>278,0,0</b>  | <b>278,0,0</b>  |
| NEFH         | missense                | *ENST00000310624                                                                                      | c.2414A>C                                                        | p.Glu805Ala                                                                  | 1                | 1                | 31,14,0       | 200,92,4        | 177,62,10       | 3518,1307,101   | 5785,1900,157   |
| NEFH         | synonymous              | *ENST00000310624                                                                                      | c.2646C>T                                                        | p.(=)                                                                        |                  |                  | 37,0,0        | 281,0,0         | 199,2,1         | 199,2,1         | 199,2,1         |
| NEFH         | missense                | *ENST00000310624                                                                                      | c.2740G>A                                                        | p.Val914Met                                                                  | 0                |                  | 41,0,0        | 301,1,0         | 258,1,0         | 258,1,0         | 258,1,0         |
| NEFH         | synonymous              | *ENST00000310624                                                                                      | c.2757C>T                                                        | p.(=)                                                                        |                  |                  | 39,1,0        | 266,6,0         | 201,3,0         | 4827,55,0       | 7724,74,0       |
| NEFH         | synonymous              | *ENST00000310624                                                                                      | c.2784A>G                                                        | p.(=)                                                                        |                  |                  | 2,16,23       | 9,129,182       | 9,98,156        | 221,1706,3014   | 308,2459,5090   |
| NEFH         | missense                | *ENST00000310624                                                                                      | c.2977A>G                                                        | p.Lys993Glu                                                                  | 1                |                  | 38,0,0        | 315,0,0         | 265,1,0         | 265,1,0         | 265,1,0         |
| <b>NIPA1</b> | <b>missense</b>         | <b>*ENST00000337435, ENST00000437912, ENST00000561183</b>                                             | <b>c.233T&gt;G, c.8T&gt;G, c.8T&gt;G</b>                         | <b>p.Val78Gly, p.Val3Gly, p.Val3Gly</b>                                      | <b>0, 1, 1</b>   | <b>0, 0, 0</b>   | <b>32,1,0</b> | <b>174,51,0</b> | <b>200,46,0</b> | <b>200,46,0</b> | <b>200,46,0</b> |
| NIPA1        | synonymous              | *ENST00000337435, ENST00000437912, ENST00000561183                                                    | c.441A>G, c.216A>G, c.216A>G                                     | p.(=), p.(=), p.(=)                                                          | ,,               | ,,               | 1,17,31       | 32,141,214      | 17,120,159      | 357,1937,2680   | 1027,3268,3595  |
| OPTN         | synonymous              | *ENST00000263036, ENST00000378764, ENST00000378757, ENST00000378747, ENST00000378752, ENST00000378748 | c.102G>A, c.102G>A, c.102G>A, c.102G>A, c.102G>A, c.102G>A       | p.(=), p.(=), p.(=), p.(=), p.(=), p.(=)                                     | ''''             | ''''             | 24,16,3       | 120,112,12      | 104,102,14      | 2564,1980,354   | 5049,2389,376   |
| OPTN         | missense                | *ENST00000263036, ENST00000378764, ENST00000378747, ENST00000378752, ENST00000378748, ENST00000378757 | c.1192C>G, c.1174C>G, c.1192C>G, c.1174C>G, c.1192C>G, c.1192C>G | p.Gln398Glu, p.Gln392Glu, p.Gln398Glu, p.Gln392Glu, p.Gln398Glu, p.Gln398Glu | 0, 0, 0, 0, 0, 0 | 0, 0, 0, 0, 0, 0 | 50,0,0        | 367,1,0         | 243,0,0         | 243,0,0         | 243,0,0         |
| OPTN         | synonymous              | *ENST00000263036, ENST00000378764, ENST00000378757, ENST00000378747, ENST00000378748, ENST00000378752 | c.123G>A, c.123G>A, c.123G>A, c.123G>A, c.123G>A, c.123G>A       | p.(=), p.(=), p.(=), p.(=), p.(=), p.(=)                                     | ''''             | ''''             | 39,2,0        | 225,8,0         | 224,9,0         | 4806,104,1      | 7710,116,1      |

|             |                 |                                                                                                                                                       |                                                                                                                         |                                                                                                                  |                                        |                                        |               |                |                |                |                |
|-------------|-----------------|-------------------------------------------------------------------------------------------------------------------------------------------------------|-------------------------------------------------------------------------------------------------------------------------|------------------------------------------------------------------------------------------------------------------|----------------------------------------|----------------------------------------|---------------|----------------|----------------|----------------|----------------|
| OPTN        | synonymous      | *ENST00000263036,<br>ENST00000378748,<br>ENST00000378764,<br>ENST00000378747,<br>ENST00000378752,<br>ENST00000378757                                  | c.1569G>A,<br>c.1569G>A,<br>c.1551G>A,<br>c.1569G>A,<br>c.1551G>A,<br>c.1569G>A                                         | p.(=), p.(=),<br>p.(=), p.(=),<br>p.(=), p.(=)                                                                   | ''''<br>,                              | ''''<br>,                              | 48,0,0        | 341,1,0        | 279,0,0        | 279,0,0        | 279,0,0        |
| <b>OPTN</b> | <b>missense</b> | <b>*ENST00000263036,<br/>ENST00000378747,<br/>ENST00000378764,<br/>ENST00000378748,<br/>ENST00000430081,<br/>ENST00000378757,<br/>ENST00000378752</b> | <b>c.187C&gt;A,<br/>c.187C&gt;A,<br/>c.187C&gt;A,<br/>c.187C&gt;A,<br/>c.16C&gt;A,<br/>c.187C&gt;A,<br/>c.187C&gt;A</b> | <b>p.Gln63Lys,<br/>p.Gln63Lys,<br/>p.Gln63Lys,<br/>p.Gln63Lys,<br/>p.Gln6Lys,<br/>p.Gln63Lys,<br/>p.Gln63Lys</b> | <b>0, 0,<br/>0, 0,<br/>1, 0,<br/>0</b> | <b>2, 2,<br/>2, 2,<br/>2, 2,<br/>2</b> | <b>49,0,0</b> | <b>361,1,0</b> | <b>271,1,0</b> | <b>271,1,0</b> | <b>271,1,0</b> |
| OPTN        | synonymous      | *ENST00000263036,<br>ENST00000378757,<br>ENST00000430081,<br>ENST00000378752,<br>ENST00000378747,<br>ENST00000378748,<br>ENST00000378764              | c.213G>A,<br>c.213G>A,<br>c.42G>A,<br>c.213G>A,<br>c.213G>A,<br>c.213G>A,<br>c.213G>A                                   | p.(=), p.(=),<br>p.(=), p.(=),<br>p.(=), p.(=),<br>p.(=)                                                         | ''''<br>''                             | ''''<br>''                             | 49,1,0        | 384,0,0        | 284,0,0        | 284,0,0        | 284,0,0        |
| OPTN        | missense        | *ENST00000263036,<br>ENST00000378764,<br>ENST00000378747,<br>ENST00000430081,<br>ENST00000378757,<br>ENST00000378752,<br>ENST00000378748              | c.287G>A,<br>c.287G>A,<br>c.287G>A,<br>c.116G>A,<br>c.287G>A,<br>c.287G>A,<br>c.287G>A                                  | p.Arg96His,<br>p.Arg96His,<br>p.Arg96His,<br>p.Arg39His,<br>p.Arg96His,<br>p.Arg96His,<br>p.Arg96His             | 0, 0,<br>0, 0,<br>0, 0,<br>0           | 0, 0,<br>0, 0,<br>0, 0,<br>0           | 47,0,0        | 368,0,0        | 264,1,0        | 642,1,0        | 1354,2,0       |
| OPTN        | missense        | *ENST00000263036,<br>ENST00000378764,<br>ENST00000378752,<br>ENST00000430081,<br>ENST00000378757,<br>ENST00000378748,<br>ENST00000378747              | c.293T>A,<br>c.293T>A,<br>c.293T>A,<br>c.122T>A,<br>c.293T>A,<br>c.293T>A,<br>c.293T>A                                  | p.Met98Lys,<br>p.Met98Lys,<br>p.Met98Lys,<br>p.Met41Lys,<br>p.Met98Lys,<br>p.Met98Lys,<br>p.Met98Lys             | 0, 0,<br>0, 0,<br>0, 0,<br>0           | 0, 0,<br>0, 0,<br>0, 0,<br>0           | 48,2,0        | 357,21,1       | 267,18,1       | 4654,303,7     | 6956,885,39    |
| OPTN        | synonymous      | *ENST00000263036,                                                                                                                                     | c.489A>G,                                                                                                               | p.(=), p.(=),                                                                                                    | ''''                                   | ''''                                   | 50,0,0        | 388,1,0        | 306,0,0        | 4968,16,0      | 7881,19,0      |

|              |                 |                                                                                                                                          |                                                                                        |                                                                                                      |                                 |                                 |               |                |                |                |                 |  |
|--------------|-----------------|------------------------------------------------------------------------------------------------------------------------------------------|----------------------------------------------------------------------------------------|------------------------------------------------------------------------------------------------------|---------------------------------|---------------------------------|---------------|----------------|----------------|----------------|-----------------|--|
|              |                 | ENST00000378764,<br>ENST00000378748,<br>ENST00000430081,<br>ENST00000378757,<br>ENST00000378747,<br>ENST00000378752                      | c.489A>G,<br>c.489A>G,<br>c.318A>G,<br>c.489A>G,<br>c.489A>G,<br>c.489A>G              | p.(=), p.(=),<br>p.(=), p.(=),<br>p.(=)                                                              | , ,                             | , ,                             |               |                |                |                |                 |  |
| OPTN         | synonymous      | *ENST00000263036,<br>ENST00000378748,<br>ENST00000430081,<br>ENST00000378757,<br>ENST00000378747,<br>ENST00000378764,<br>ENST00000378752 | c.513C>T,<br>c.513C>T,<br>c.342C>T,<br>c.513C>T,<br>c.513C>T,<br>c.513C>T,<br>c.513C>T | p.(=), p.(=),<br>p.(=), p.(=),<br>p.(=), p.(=),<br>p.(=)                                             | , , , ,                         | , , , ,                         | 50,0,0        | 384,0,0        | 299,1,0        | 4598,2,0       | 6801,2,0        |  |
| OPTN         | missense        | *ENST00000263036,<br>ENST00000378748,<br>ENST00000378757,<br>ENST00000378747,<br>ENST00000378752,<br>ENST00000378764                     | c.964A>G,<br>c.964A>G,<br>c.964A>G,<br>c.964A>G,<br>c.946A>G,<br>c.946A>G              | p.Lys322Glu,<br>p.Lys322Glu,<br>p.Lys322Glu,<br>p.Lys322Glu,<br>p.Lys316Glu,<br>p.Lys316Glu          | 0, 0,<br>0, 0,<br>0, 0,<br>0, 0 | 0, 0,<br>0, 0,<br>0, 0,<br>0, 0 | 0,0,44        | 0,0,294        | 0,1,195        | 0,12,4862      | 2,138,7650      |  |
| PARK7        | synonymous      | *ENST00000338639,<br>ENST00000469225,<br>ENST00000377491,<br>ENST00000377488,<br>ENST00000493678,<br>ENST00000493373                     | c.234C>T,<br>c.117C>T,<br>c.234C>T,<br>c.234C>T,<br>c.234C>T,<br>c.234C>T              | p.(=), p.(=),<br>p.(=), p.(=),<br>p.(=), p.(=)                                                       | , , , ,                         | , , , ,                         | 48,0,0        | 345,1,0        | 240,0,0        | 4906,12,0      | 7317,490,27     |  |
| PARK7        | missense        | *ENST00000338639,<br>ENST00000493678,<br>ENST00000377493,<br>ENST00000469225,<br>ENST00000377488,<br>ENST00000493373,<br>ENST00000377491 | c.293G>A,<br>c.293G>A,<br>c.233G>A,<br>c.176G>A,<br>c.293G>A,<br>c.293G>A,<br>c.293G>A | p.Arg98Gln,<br>p.Arg98Gln,<br>p.Arg78Gln,<br>p.Arg59Gln,<br>p.Arg98Gln,<br>p.Arg98Gln,<br>p.Arg98Gln | 0, 0,<br>0, 0,<br>0, 0,<br>0    | 0, 0,<br>0, 0,<br>0, 0,<br>0    | 46,0,0        | 294,3,0        | 239,6,0        | 4809,113,1     | 7715,123,1      |  |
| <b>PARK7</b> | <b>missense</b> | <b>*ENST00000338639,<br/>ENST00000493373,<br/>ENST00000377493,</b>                                                                       | <b>c.49A&gt;C,<br/>c.49A&gt;C,<br/>c.49A&gt;C,</b>                                     | <b>p.Met17Leu,<br/>p.Met17Leu,<br/>p.Met17Leu,</b>                                                   | <b>1, 1,<br/>1, 1,<br/>1, 1</b> | <b>0, 0,<br/>0, 0,<br/>0, 0</b> | <b>49,0,0</b> | <b>375,1,0</b> | <b>283,0,0</b> | <b>661,0,0</b> | <b>1373,1,0</b> |  |

|               |                                               |                                                                                                                                          |                                                                                        |                                                                                                             |                              |                              |               |                |                |                |                |  |
|---------------|-----------------------------------------------|------------------------------------------------------------------------------------------------------------------------------------------|----------------------------------------------------------------------------------------|-------------------------------------------------------------------------------------------------------------|------------------------------|------------------------------|---------------|----------------|----------------|----------------|----------------|--|
|               |                                               | <b>ENST00000493678,<br/>ENST00000377488,<br/>ENST00000377491</b>                                                                         | <b>c.49A&gt;C,<br/>c.49A&gt;C,<br/>c.49A&gt;C</b>                                      | <b>p.Met17Leu,<br/>p.Met17Leu,<br/>p.Met17Leu</b>                                                           |                              |                              |               |                |                |                |                |  |
| PARK7         | synonymous                                    | *ENST00000338639,<br>ENST00000493373,<br>ENST00000469225,<br>ENST00000377493,<br>ENST00000377488,<br>ENST00000377491,<br>ENST00000493678 | c.501A>G,<br>c.501A>G,<br>c.414A>G,<br>c.441A>G,<br>c.501A>G,<br>c.501A>G,<br>c.501A>G | p.(=), p.(=),<br>p.(=), p.(=),<br>p.(=), p.(=),<br>p.(=)                                                    | ,,, ,<br>,, ,                | ,,, ,<br>,, ,                | 50,0,0        | 383,1,0        | 305,2,0        | 4967,18,0      | 7881,20,0      |  |
| PARK7         | missense                                      | *ENST00000338639,<br>ENST00000377493,<br>ENST00000377491,<br>ENST00000469225,<br>ENST00000377488,<br>ENST00000493373,<br>ENST00000493678 | c.535G>A,<br>c.475G>A,<br>c.535G>A,<br>c.448G>A,<br>c.535G>A,<br>c.535G>A,<br>c.535G>A | p.Ala179Thr,<br>p.Ala159Thr,<br>p.Ala179Thr,<br>p.Ala150Thr,<br>p.Ala179Thr,<br>p.Ala179Thr,<br>p.Ala179Thr | 0, 0,<br>0, 0,<br>0, 0,<br>0 | 0, 0,<br>0, 0,<br>0, 0,<br>0 | 50,0,0        | 378,0,0        | 303,1,0        | 4976,6,0       | 7890,8,0       |  |
| PON1          | missense                                      | *ENST00000222381,<br>ENST00000542556                                                                                                     | c.163T>A,<br>c.163T>A                                                                  | p.Leu55Met,<br>p.Leu55Met                                                                                   | 1, 1                         | 0, 2                         | 18,26,6       | 159,176,54     | 109,128,43     | 1982,2264,712  | 4041,3035,798  |  |
| <b>PON1</b>   | <b>feature<br/>elongation,<br/>frameshift</b> | <b>*ENST00000222381,<br/>ENST00000542556</b>                                                                                             | <b>c.391dupG,<br/>c.391dupG</b>                                                        | <b>p.Val131Glyf<br/>sX15,<br/>p.Val131Glyf<br/>sX15</b>                                                     | <b>,</b>                     | <b>,</b>                     | <b>50,0,0</b> | <b>391,0,0</b> | <b>282,1,0</b> | <b>282,1,0</b> | <b>282,1,0</b> |  |
| PON1          | synonymous                                    | *ENST00000222381,<br>ENST00000542556                                                                                                     | c.468A>G,<br>c.468A>G                                                                  | p.(=), p.(=)                                                                                                | ,                            | ,                            | 50,0,0        | 388,1,0        | 280,0,0        | 280,0,0        | 280,0,0        |  |
| PON1          | missense                                      | *ENST00000222381,<br>ENST00000542556                                                                                                     | c.575A>G,<br>c.575A>G                                                                  | p.Gln192Arg,<br>p.Gln192Arg                                                                                 | 0, 0                         | 0, 0                         | 24,23,3       | 211,152,28     | 150,115,21     | 2544,2013,407  | 2905,3306,1669 |  |
| PON1          | missense                                      | *ENST00000222381,<br>ENST00000542556                                                                                                     | c.602C>T,<br>c.602C>T                                                                  | p.Ala201Val,<br>p.Ala201Val                                                                                 | 0, 0                         | 0, 0                         | 50,0,0        | 386,2,0        | 278,3,0        | 4931,28,0      | 7844,31,0      |  |
| PON1          | synonymous                                    | *ENST00000222381,<br>ENST00000542556                                                                                                     | c.603G>A,<br>c.603G>A                                                                  | p.(=), p.(=)                                                                                                | ,                            | ,                            | 50,0,0        | 386,4,0        | 283,1,0        | 4946,16,0      | 7860,18,0      |  |
| PON1          | missense                                      | *ENST00000222381,<br>ENST00000542556                                                                                                     | c.953C>T,<br>c.953C>T                                                                  | p.Thr318Ile,<br>p.Thr318Ile                                                                                 | 1, 1                         | 0, 0                         | 50,0,0        | 390,0,0        | 289,1,0        | 4588,2,0       | 6791,2,0       |  |
| PON1,<br>PON3 | synonymous                                    | *ENST00000265627,<br>ENST00000427422,                                                                                                    | c.63C>T,<br>c.63C>T,                                                                   | p.(=), p.(=),<br>p.(=)                                                                                      | ,,                           | ,,                           | 1,3,0         | 10,34,1        | 12,28,1        | 2607,1810,302  | 3945,3085,605  |  |

|               |                                               |                                                                   |                                                |                                                                               |            |            |               |                |                |                    |                |
|---------------|-----------------------------------------------|-------------------------------------------------------------------|------------------------------------------------|-------------------------------------------------------------------------------|------------|------------|---------------|----------------|----------------|--------------------|----------------|
|               |                                               | ENST00000542556                                                   | c.63C>T                                        |                                                                               |            |            |               |                |                |                    |                |
| PON1,<br>PON3 | stop gained                                   | *ENST00000265627,<br>ENST00000427422,<br>ENST00000542556          | c.94C>T,<br>c.94C>T,<br>c.94C>T                | p.Arg32X,<br>p.Arg32X,<br>p.Arg32X                                            | , ,        | , ,        | 48,0,0        | 371,3,0        | 280,0,0        | 4937,21,0          | 7849,25,0      |
| <b>PON2</b>   | <b>feature<br/>truncation,<br/>frameshift</b> | <b>*ENST00000222572,<br/>ENST00000433091,<br/>ENST00000536183</b> | <b>c.286delA,<br/>c.286delA,<br/>c.349delA</b> | <b>p.Arg96Glyfs<br/>X5,<br/>p.Arg96Glyfs<br/>X5,<br/>p.Arg117Glyf<br/>sX5</b> | , ,        | , ,        | <b>49,1,0</b> | <b>386,2,0</b> | <b>290,1,0</b> | <b>290,1,0</b>     | <b>290,1,0</b> |
| PON2          | missense                                      | *ENST00000222572,<br>ENST00000433091,<br>ENST00000536183          | c.359T>G,<br>c.359T>G,<br>c.422T>G             | p.Ile120Arg,<br>p.Ile120Arg,<br>p.Ile141Arg                                   | 1, 1,<br>0 | 0, 0,<br>1 | 50,0,0        | 389,0,0        | 287,1,0        | 287,1,0            | 287,1,0        |
| PON2          | missense                                      | *ENST00000222572,<br>ENST00000536183,<br>ENST00000433091          | c.443C>G,<br>c.506C>G,<br>c.407C>G             | p.Ala148Gly,<br>p.Ala169Gly,<br>p.Ala136Gly                                   | 1, 1,<br>1 | 0, 0,<br>0 | 31,17,0       | 205,158,22     | 155,90,20      | 2924,1756,263      | 4445,2939,475  |
| PON2          | missense                                      | *ENST00000222572,<br>ENST00000433091,<br>ENST00000536183          | c.661T>G,<br>c.625T>G,<br>c.724T>G             | p.Ser221Ala,<br>p.Ser209Ala,<br>p.Ser242Ala                                   | 0, 0,<br>0 | 0, 0,<br>0 | 49,0,0        | 380,1,0        | 257,0,0        | 257,0,0            | 257,0,0        |
| PON2          | missense                                      | *ENST00000222572,<br>ENST00000433091,<br>ENST00000536183          | c.827C>T,<br>c.791C>T,<br>c.890C>T             | p.Ser276Leu,<br>p.Ser264Leu,<br>p.Ser297Leu                                   | 1, 1,<br>1 | 0, 0,<br>0 | 50,0,0        | 381,1,0        | 273,1,0        | 4572,2,0           | 6775,2,0       |
| PON2          | missense                                      | *ENST00000222572,<br>ENST00000536183,<br>ENST00000433091          | c.913C>T,<br>c.976C>T,<br>c.877C>T             | p.Arg305Cys,<br>p.Arg326Cys,<br>p.Arg293Cys                                   | 1, 1,<br>1 | 2, 2,<br>2 | 48,1,0        | 384,2,0        | 276,0,0        | 4573,3,0           | 6776,3,0       |
| PON2          | missense                                      | *ENST00000222572,<br>ENST00000433091,<br>ENST00000536183          | c.932C>G,<br>c.896C>G,<br>c.995C>G             | p.Ser311Cys,<br>p.Ser299Cys,<br>p.Ser332Cys                                   | 1, 1,<br>1 | 0, 0,<br>0 | 32,17,1       | 210,157,23     | 166,95,22      | 2934,1762,265      | 4447,2950,480  |
| PON3          | missense                                      | *ENST00000265627,<br>ENST00000427422                              | c.262A>G,<br>c.262A>G                          | p.Met88Val,<br>p.Met88Val                                                     | 1, 0       | 0, 0       | 50,0,0        | 383,1,0        | 280,1,0        | 4943,16,0          | 7859,16,0      |
| PON3          | synonymous                                    | *ENST00000265627,<br>ENST00000427422                              | c.297G>A,<br>c.297G>A                          | p.(=), p.(=)                                                                  | ,          | ,          | 17,20,1<br>2  | 93,199,91      | 85,121,72      | 1446,2454,105<br>6 | 1930,3805,2137 |
| PON3          | missense                                      | *ENST00000265627,<br>ENST00000427422                              | c.408G>T,<br>c.408G>T                          | p.Met136Ile,<br>p.Met136Ile                                                   | 0, 0       | 0, 0       | 49,0,0        | 380,1,0        | 259,2,0        | 4554,7,0           | 6756,8,0       |
| PON3          | synonymous                                    | *ENST00000265627,                                                 | c.609T>C,                                      | p.(=), p.(=)                                                                  | ,          | ,          | 49,1,0        | 379,12,0       | 281,7,0        | 4908,57,1          | 7814,67,1      |

|             |                   |                                                    |                                  |                                       |             |             |               |                 |                 |                      |                      |                 |
|-------------|-------------------|----------------------------------------------------|----------------------------------|---------------------------------------|-------------|-------------|---------------|-----------------|-----------------|----------------------|----------------------|-----------------|
|             |                   | ENST00000427422                                    | c.609T>C                         |                                       |             |             |               |                 |                 |                      |                      |                 |
| <b>PON3</b> | <b>synonymous</b> | <b>*ENST00000265627</b>                            | <b>c.819T&gt;C</b>               | <b>p.(=)</b>                          |             |             | <b>47,1,0</b> | <b>330,28,0</b> | <b>247,23,0</b> | <b>247,23,0</b>      | <b>247,23,0</b>      | <b>247,23,0</b> |
| PON3        | synonymous        | *ENST00000265627                                   | c.954C>T                         | p.(=)                                 |             |             | 49,0,0        | 376,1,0         | 285,0,0         | 4584,1,0             | 6787,1,0             |                 |
| PON3        | missense          | *ENST00000265627                                   | c.971G>A                         | p.Gly324Asp                           | 1           | 2           | 49,0,0        | 382,0,0         | 292,1,0         | 4935,35,0            | 7850,36,0            |                 |
| <b>PRPH</b> | <b>synonymous</b> | <b>*ENST00000257860, ENST00000532332</b>           | <b>c.1083C&gt;G, c.268C&gt;G</b> | <b>p.(=), p.(=)</b>                   | ,           | ,           | <b>0,0,0</b>  | <b>1,2,0</b>    | <b>1,0,0</b>    | <b>4535,129,0</b>    | <b>7383,188,0</b>    |                 |
| <b>PRPH</b> | <b>synonymous</b> | <b>*ENST00000257860, ENST00000532332</b>           | <b>c.1104A&gt;G, c.289A&gt;G</b> | <b>p.(=), p.(=)</b>                   | ,           | ,           | <b>0,0,0</b>  | <b>9,0,0</b>    | <b>7,0,0</b>    | <b>4305,1,0</b>      | <b>6507,1,0</b>      |                 |
| <b>PRPH</b> | <b>synonymous</b> | <b>*ENST00000257860, ENST00000532332</b>           | <b>c.1107A&gt;G, c.292A&gt;G</b> | <b>p.(=), p.(=)</b>                   | ,           | ,           | <b>0,5,0</b>  | <b>6,21,0</b>   | <b>4,12,2</b>   | <b>3018,1458,219</b> | <b>4431,2637,543</b> |                 |
| <b>PRPH</b> | <b>missense</b>   | <b>*ENST00000257860, ENST00000532332</b>           | <b>c.1225G&gt;A, c.410G&gt;A</b> | <b>p.Val409Met, p.Val138Met</b>       | <b>0, 0</b> | <b>0, 0</b> | <b>41,0,0</b> | <b>271,2,0</b>  | <b>176,7,0</b>  | <b>176,7,0</b>       | <b>176,7,0</b>       | <b>176,7,0</b>  |
| <b>PRPH</b> | <b>missense</b>   | <b>*ENST00000257860, ENST00000532332</b>           | <b>c.1231G&gt;A, c.416G&gt;A</b> | <b>p.Val411Ile, p.Val140Ile</b>       | <b>0, 0</b> | <b>0, 0</b> | <b>43,0,0</b> | <b>271,0,0</b>  | <b>191,5,0</b>  | <b>191,5,0</b>       | <b>191,5,0</b>       | <b>191,5,0</b>  |
| PRPH        | missense          | *ENST00000257860, ENST00000532332                  | c.1303C>T, c.488C>T              | p.Arg435Trp, p.Arg164Trp              | 1, 1        | 2, 1        | 41,0,0        | 244,1,0         | 215,1,0         | 4889,5,0             | 7802,8,0             |                 |
| PRPH        | missense          | *ENST00000257860                                   | c.26G>A                          | p.Arg9Gln                             | 1           | 1           | 18,1,0        | 43,2,0          | 31,2,0          | 4585,111,1           | 7459,145,2           |                 |
| <b>PRPH</b> | <b>missense</b>   | <b>*ENST00000257860, ENST00000451891</b>           | <b>c.322T&gt;C, c.79T&gt;C</b>   | <b>p.Phe108Leu, p.Phe27Leu</b>        | <b>1, 1</b> | <b>1, 2</b> | <b>2,0,0</b>  | <b>4,1,0</b>    | <b>5,0,0</b>    | <b>5,0,0</b>         | <b>5,0,0</b>         | <b>5,0,0</b>    |
| PRPH        | synonymous        | *ENST00000257860                                   | c.63C>T                          | p.(=)                                 |             |             | 24,0,0        | 74,7,0          | 45,5,0          | 4516,169,0           | 7272,309,2           |                 |
| <b>PRPH</b> | <b>missense</b>   | <b>*ENST00000257860, ENST00000532332</b>           | <b>c.829G&gt;A, c.14G&gt;A</b>   | <b>p.Ala277Thr, p.Ala6Thr</b>         | <b>0, 0</b> | <b>0, 0</b> | <b>2,0,0</b>  | <b>2,0,0</b>    | <b>2,0,0</b>    | <b>4511,169,0</b>    | <b>7276,319,1</b>    |                 |
| SETX        | synonymous        | *ENST00000224140, ENST00000372169, ENST00000393220 | c.1077T>C, c.1077T>C, c.1077T>C  | p.(=), p.(=), p.(=)                   | ,,          | ,,          | 0,15,35       | 6,104,276       | 6,64,187        | 110,1280,3544        | 588,2589,4673        |                 |
| SETX        | missense          | *ENST00000224140, ENST00000372169, ENST00000393220 | c.1655A>C, c.1655A>C, c.1655A>C  | p.Gln552Pro, p.Gln552Pro, p.Gln552Pro | 0, 0, 0     | 1, 1, 1     | 50,0,0        | 390,0,0         | 290,1,0         | 290,1,0              | 290,1,0              | 290,1,0         |
| SETX        | missense          | *ENST00000224140, ENST00000372169, ENST00000393220 | c.1750C>G, c.1750C>G, c.1750C>G  | p.Leu584Val, p.Leu584Val, p.Leu584Val | 1, 1, 1     | 2, 2, 2     | 50,0,0        | 390,1,0         | 278,2,0         | 278,2,0              | 278,2,0              | 278,2,0         |
| SETX        | missense          | *ENST00000224140, ENST00000372169, ENST00000393220 | c.1869A>C, c.1869A>C, c.1869A>C  | p.Glu623Asp, p.Glu623Asp, p.Glu623Asp | 1, 1, 1     | 2, 2, 2     | 50,0,0        | 385,0,0         | 267,1,0         | 4564,4,0             | 6767,4,0             |                 |
| SETX        | synonymous        | *ENST00000224140,                                  | c.192A>G,                        | p.(=), p.(=),                         | ,,          | ,,          | 48,1,0        | 377,5,0         | 256,2,1         | 4910,24,1            | 7824,26,1            |                 |

|      |            |                                                          |                                       |                                             |            |            |        |          |          |             |               |  |
|------|------------|----------------------------------------------------------|---------------------------------------|---------------------------------------------|------------|------------|--------|----------|----------|-------------|---------------|--|
|      |            | ENST00000393220,<br>ENST00000372169                      | c.192A>G,<br>c.192A>G                 | p.(=)                                       |            |            |        |          |          |             |               |  |
| SETX | missense   | *ENST00000224140,<br>ENST00000393220,<br>ENST00000372169 | c.1979C>G,<br>c.1979C>G,<br>c.1979C>G | p.Ala660Gly,<br>p.Ala660Gly,<br>p.Ala660Gly | 0, 0,<br>0 | 0, 0,<br>0 | 43,7,0 | 339,44,1 | 234,33,0 | 4384,539,21 | 6103,1543,214 |  |
| SETX | missense   | *<br>,<br>ENST00000436441,<br>ENST00000372169            | c.2095C>T,<br>c.7369C>T               | p.Leu699Phe,<br>p.Leu2457Phe                | 0, 0       | 0, 0       | 6,0,0  | 58,3,0   | 72,3,0   | 2409,34,1   | 3995,37,1     |  |
| SETX | synonymous | *ENST00000224140,<br>ENST00000393220,<br>ENST00000372169 | c.234G>A,<br>c.234G>A,<br>c.234G>A    | p.(=), p.(=),<br>p.(=)                      | , ,        | , ,        | 50,0,0 | 384,0,0  | 262,2,0  | 4559,5,0    | 6761,6,0      |  |
| SETX | missense   | *ENST00000224140,<br>ENST00000372169,<br>ENST00000393220 | c.2411T>C,<br>c.2411T>C,<br>c.2411T>C | p.Leu804Ser,<br>p.Leu804Ser,<br>p.Leu804Ser | 1, 1,<br>1 | 0, 0,<br>0 | 49,0,0 | 378,1,0  | 253,0,0  | 4928,2,0    | 7843,2,0      |  |
| SETX | missense   | *ENST00000224140,<br>ENST00000372169,<br>ENST00000393220 | c.2479A>G,<br>c.2479A>G,<br>c.2479A>G | p.Lys827Glu,<br>p.Lys827Glu,<br>p.Lys827Glu | 0, 0,<br>0 | 0, 0,<br>0 | 49,0,0 | 378,1,0  | 246,0,0  | 4914,8,0    | 7828,9,0      |  |
| SETX | missense   | *ENST00000224140,<br>ENST00000372169,<br>ENST00000393220 | c.2717C>T,<br>c.2717C>T,<br>c.2717C>T | p.Ser906Leu,<br>p.Ser906Leu,<br>p.Ser906Leu | 0, 0,<br>0 | 0, 0,<br>0 | 49,0,0 | 380,1,0  | 258,0,0  | 4557,1,0    | 6760,1,0      |  |
| SETX | missense   | *ENST00000224140,<br>ENST00000372169,<br>ENST00000393220 | c.2755G>C,<br>c.2755G>C,<br>c.2755G>C | p.Val919Leu,<br>p.Val919Leu,<br>p.Val919Leu | 0, 0,<br>0 | 0, 0,<br>0 | 50,0,0 | 383,1,0  | 266,0,0  | 266,0,0     | 266,0,0       |  |
| SETX | missense   | *ENST00000224140,<br>ENST00000393220,<br>ENST00000372169 | c.2842C>A,<br>c.2842C>A,<br>c.2842C>A | p.Pro948Thr,<br>p.Pro948Thr,<br>p.Pro948Thr | 0, 0,<br>0 | 0, 0,<br>0 | 49,1,0 | 387,0,0  | 282,0,0  | 282,0,0     | 282,0,0       |  |
| SETX | synonymous | *ENST00000224140,<br>ENST00000372169,<br>ENST00000393220 | c.2964A>G,<br>c.2964A>G,<br>c.2964A>G | p.(=), p.(=),<br>p.(=)                      | , ,        | , ,        | 50,0,0 | 389,0,0  | 278,1,0  | 4577,2,0    | 6780,2,0      |  |
| SETX | missense   | *ENST00000224140,<br>ENST00000372169,<br>ENST00000393220 | c.2975A>G,<br>c.2975A>G,<br>c.2975A>G | p.Lys992Arg,<br>p.Lys992Arg,<br>p.Lys992Arg | 1, 1,<br>1 | 0, 0,<br>0 | 48,1,1 | 375,13,0 | 277,3,0  | 4799,159,0  | 7698,176,0    |  |
| SETX | synonymous | *ENST00000224140,<br>ENST00000393220,<br>ENST00000372169 | c.3147C>T,<br>c.3147C>T,<br>c.3147C>T | p.(=), p.(=),<br>p.(=)                      | , ,        | , ,        | 42,8,0 | 336,53,1 | 228,36,2 | 4199,718,27 | 6767,1048,45  |  |

|             |                                               |                                                                   |                                                            |                                                                           |            |            |               |                |                |                |                |
|-------------|-----------------------------------------------|-------------------------------------------------------------------|------------------------------------------------------------|---------------------------------------------------------------------------|------------|------------|---------------|----------------|----------------|----------------|----------------|
| SETX        | missense                                      | *ENST00000224140,<br>ENST00000372169,<br>ENST00000393220          | c.3221A>G,<br>c.3221A>G,<br>c.3221A>G                      | p.Glu1074Gly<br>,<br>p.Glu1074Gly<br>,<br>p.Glu1074Gly                    | 1, 1,<br>1 | 2, 2,<br>2 | 50,0,0        | 384,0,0        | 264,1,0        | 264,1,0        | 264,1,0        |
| SETX        | missense                                      | *ENST00000224140,<br>ENST00000393220,<br>ENST00000372169          | c.3229G>A,<br>c.3229G>A,<br>c.3229G>A                      | p.Asp1077As<br>n,<br>p.Asp1077As<br>n,<br>p.Asp1077As<br>n                | 1, 1,<br>1 | 1, 1,<br>1 | 50,0,0        | 383,2,0        | 267,0,0        | 4936,9,0       | 7850,10,0      |
| SETX        | synonymous                                    | *ENST00000224140,<br>ENST00000393220,<br>ENST00000372169          | c.3336T>C,<br>c.3336T>C,<br>c.3336T>C                      | p.(=), p.(=),<br>p.(=)                                                    | ,,         | ,,         | 50,0,0        | 383,4,0        | 267,2,0        | 4940,7,0       | 7853,10,0      |
| SETX        | missense                                      | *ENST00000224140,<br>ENST00000393220,<br>ENST00000372169          | c.3455T>G,<br>c.3455T>G,<br>c.3455T>G                      | p.Phe1152Cy<br>s,<br>p.Phe1152Cy<br>s,<br>p.Phe1152Cy<br>s                | 1, 1,<br>1 | 1, 1,<br>1 | 47,3,0        | 362,25,0       | 263,13,0       | 4629,320,5     | 7166,679,25    |
| SETX        | missense                                      | *ENST00000224140,<br>ENST00000393220,<br>ENST00000372169          | c.3576T>G,<br>c.3576T>G,<br>c.3576T>G                      | p.Asp1192Glu<br>,<br>p.Asp1192Glu<br>,<br>p.Asp1192Glu                    | 0, 0,<br>0 | 0, 0,<br>0 | 0,15,35       | 5,93,286       | 3,66,203       | 93,1168,3689   | 533,2448,4885  |
| SETX        | missense                                      | *ENST00000224140,<br>ENST00000393220,<br>ENST00000372169          | c.3754G>A,<br>c.3754G>A,<br>c.3754G>A                      | p.Gly1252Arg<br>,<br>p.Gly1252Arg<br>,<br>p.Gly1252Arg                    | 0, 0,<br>0 | 0, 0,<br>0 | 0,15,35       | 6,107,276      | 8,70,212       | 118,1289,3561  | 1198,2588,4098 |
| <b>SETX</b> | <b>feature<br/>elongation,<br/>frameshift</b> | <b>*ENST00000224140,<br/>ENST00000372169,<br/>ENST00000393220</b> | <b>c.3930dup<br/>A,<br/>c.3930dup<br/>A,<br/>c.3930dup</b> | <b>p.Arg1311Thr<br/>fsX2,<br/>p.Arg1311Thr<br/>fsX2,<br/>p.Arg1311Thr</b> | <b>,,</b>  | <b>,,</b>  | <b>49,1,0</b> | <b>391,0,0</b> | <b>293,0,0</b> | <b>293,0,0</b> | <b>293,0,0</b> |



|             |                 |                                                                              | <b>A</b>                                             | <b>fsX2</b>                                                   |                    |                    |               |                |                |                |                |  |
|-------------|-----------------|------------------------------------------------------------------------------|------------------------------------------------------|---------------------------------------------------------------|--------------------|--------------------|---------------|----------------|----------------|----------------|----------------|--|
| SETX        | missense        | *ENST00000224140,<br>ENST00000372169,<br>ENST00000393220                     | c.4156A>G,<br>c.4156A>G,<br>c.4156A>G                | p.Ile1386Val,<br>p.Ile1386Val,<br>p.Ile1386Val                | 0, 0,<br>0         | 0, 0,<br>0         | 0,15,35       | 6,107,277      | 8,68,191       | 112,1292,3541  | 1190,2591,4080 |  |
| SETX        | missense        | *ENST00000224140,<br>ENST00000372169,<br>ENST00000393220                     | c.4660T>G,<br>c.4660T>G,<br>c.4660T>G                | p.Cys1554Gly<br>,<br>p.Cys1554Gly<br>,<br>p.Cys1554Gly        | 1, 1,<br>1         | 2, 2,<br>2         | 49,1,0        | 385,6,0        | 284,1,0        | 4922,41,0      | 7831,48,0      |  |
| SETX        | synonymous      | *ENST00000224140,<br>ENST00000372169,<br>ENST00000393220                     | c.4707T>C,<br>c.4707T>C,<br>c.4707T>C                | p.(=), p.(=),<br>p.(=)                                        | , ,                | , ,                | 50,0,0        | 391,0,0        | 288,1,0        | 288,1,0        | 288,1,0        |  |
| SETX        | missense        | *ENST00000224140,<br>ENST00000372169,<br>ENST00000393220                     | c.472T>G,<br>c.472T>G,<br>c.472T>G                   | p.Leu158Val,<br>p.Leu158Val,<br>p.Leu158Val                   | 1, 1,<br>1         | 2, 2,<br>2         | 50,0,0        | 383,3,0        | 280,5,0        | 4910,53,0      | 7821,58,0      |  |
| SETX        | synonymous      | *ENST00000224140,<br>ENST00000393220,<br>ENST00000372169                     | c.4755T>G,<br>c.4755T>G,<br>c.4755T>G                | p.(=), p.(=),<br>p.(=)                                        | , ,                | , ,                | 50,0,0        | 384,8,0        | 287,3,0        | 4888,80,0      | 7796,88,0      |  |
| <b>SETX</b> | <b>missense</b> | <b>*ENST00000224140,<br/>ENST00000393220,<br/>ENST00000372169</b>            | <b>c.506G&gt;A,<br/>c.506G&gt;A,<br/>c.506G&gt;A</b> | <b>p.Arg169His,<br/>p.Arg169His,<br/>p.Arg169His</b>          | <b>1, 1,<br/>1</b> | <b>2, 2,<br/>2</b> | <b>49,0,0</b> | <b>372,3,0</b> | <b>249,2,0</b> | <b>249,2,0</b> | <b>249,2,0</b> |  |
| SETX        | synonymous      | *ENST00000224140,<br>ENST00000393220,<br>ENST00000372169                     | c.5271A>G,<br>c.5271A>G,<br>c.5271A>G                | p.(=), p.(=),<br>p.(=)                                        | , ,                | , ,                | 50,0,0        | 387,1,0        | 268,1,0        | 268,1,0        | 268,1,0        |  |
| SETX        | synonymous      | *ENST00000224140,<br>ENST00000436441,<br>ENST00000372169,<br>ENST00000393220 | c.5283A>G,<br>c.9A>G,<br>c.5283A>G,<br>c.5283A>G     | p.(=), p.(=),<br>p.(=), p.(=)                                 | , , ,              | , , ,              | 49,0,0        | 375,1,0        | 263,0,0        | 4558,4,0       | 6761,4,0       |  |
| SETX        | synonymous      | *ENST00000224140,<br>ENST00000372169,<br>ENST00000393220                     | c.540A>G,<br>c.540A>G,<br>c.540A>G                   | p.(=), p.(=),<br>p.(=)                                        | , ,                | , ,                | 50,0,0        | 385,1,0        | 279,0,0        | 279,0,0        | 279,0,0        |  |
| SETX        | missense        | *ENST00000224140,<br>ENST00000436441,<br>ENST00000372169,<br>ENST00000393220 | c.5563A>G,<br>c.289A>G,<br>c.5563A>G,<br>c.5563A>G   | p.Thr1855Ala,<br>p.Thr97Ala,<br>p.Thr1855Ala,<br>p.Thr1855Ala | 0, 0,<br>0, 0      | 0, 0,<br>0, 0      | 34,15,1       | 275,107,9      | 197,72,8       | 3541,1301,113  | 4078,2603,1190 |  |

|      |            |                                                                                        |                                                                                     |                                                                                     |                       |                       |               |                |                |                |                |
|------|------------|----------------------------------------------------------------------------------------|-------------------------------------------------------------------------------------|-------------------------------------------------------------------------------------|-----------------------|-----------------------|---------------|----------------|----------------|----------------|----------------|
| SETX | missense   | *ENST00000224140,<br>ENST00000372169,<br>ENST00000436441,<br>ENST00000393220           | c.5587A>G,<br>c.5587A>G,<br>c.313A>G,<br>c.5587A>G                                  | p.Thr1863Ala,<br>p.Thr1863Ala,<br>p.Thr105Ala,<br>p.Thr1863Ala                      | 1, 1,<br>1, 1         | 2, 2,<br>2, 2         | 49,1,0        | 391,0,0        | 278,0,0        | 278,0,0        | 278,0,0        |
| SETX | synonymous | *ENST00000224140,<br>ENST00000372169,<br>ENST00000393220,<br>ENST00000436441           | c.5811T>C,<br>c.5811T>C,<br>c.5811T>C,<br>c.537T>C                                  | p.(=), p.(=),<br>p.(=), p.(=)                                                       | , , ,                 | , , ,                 | 33,15,1       | 274,106,8      | 191,69,8       | 3532,1301,113  | 4070,2603,1189 |
| SETX | missense   | *ENST00000224140,<br>ENST00000372169,<br>ENST00000436441,<br>ENST00000393220           | c.5842A>G,<br>c.5842A>G,<br>c.568A>G,<br>c.5842A>G                                  | p.Met1948Val,<br>p.Met1948Val,<br>p.Met190Val,<br>p.Met1948Val                      | 1, 1,<br>1, 1         | 2, 2,<br>2, 2         | 50,0,0        | 387,1,0        | 279,0,0        | 279,0,0        | 279,0,0        |
| SETX | missense   | *ENST00000224140,<br>ENST00000393220,<br>ENST00000372169,<br>ENST00000436441           | c.5998C>G,<br>c.5998C>G,<br>c.5998C>G,<br>c.724C>G                                  | p.Gln2000Glu,<br>p.Gln2000Glu,<br>p.Gln2000Glu,<br>p.Gln242Glu                      | 1, 1,<br>1, 0         | 1, 0,<br>0, 0         | 49,1,0        | 386,2,0        | 285,0,0        | 4959,4,0       | 7874,5,0       |
| SETX | missense   | *ENST00000224140,<br>ENST00000393220,<br>ENST00000372169                               | c.59G>A,<br>c.59G>A,<br>c.59G>A                                                     | p.Arg20His,<br>p.Arg20His,<br>p.Arg20His                                            | 0, 0,<br>0            | 0, 0,<br>0            | 49,0,0        | 380,5,0        | 288,9,0        | 4866,108,1     | 7771,119,1     |
| SETX | missense   | <b>*ENST00000224140,<br/>ENST00000393220,<br/>ENST00000372169,<br/>ENST00000436441</b> | <b>c.6005G&gt;A<br/>,<br/>c.6005G&gt;A<br/>,<br/>c.6005G&gt;A<br/>, c.731G&gt;A</b> | <b>p.Arg2002His<br/>,<br/>p.Arg2002His<br/>,<br/>p.Arg2002His<br/>, p.Arg244His</b> | <b>1, 1,<br/>1, 1</b> | <b>2, 2,<br/>2, 2</b> | <b>50,0,0</b> | <b>375,1,0</b> | <b>268,2,0</b> | <b>268,2,0</b> | <b>268,2,0</b> |
| SETX | synonymous | *ENST00000224140,<br>ENST00000393220,<br>ENST00000372169,<br>ENST00000436441           | c.6024T>C,<br>c.6024T>C,<br>c.6024T>C,<br>c.750T>C                                  | p.(=), p.(=),<br>p.(=), p.(=)                                                       | , , ,                 | , , ,                 | 50,0,0        | 389,0,0        | 285,1,0        | 285,1,0        | 285,1,0        |
| SETX | missense   | <b>*ENST00000224140,</b>                                                               | <b>c.6049A&gt;G</b>                                                                 | <b>p.Met2017Val</b>                                                                 | <b>0, 0,</b>          | <b>2, 2,</b>          | <b>50,0,0</b> | <b>390,1,0</b> | <b>285,0,0</b> | <b>285,0,0</b> | <b>285,0,0</b> |

|             |                 |                                                                            |                                                               |                                                              |                   |                   |               |                |                |                |                |  |
|-------------|-----------------|----------------------------------------------------------------------------|---------------------------------------------------------------|--------------------------------------------------------------|-------------------|-------------------|---------------|----------------|----------------|----------------|----------------|--|
|             |                 | <i>ENST00000393220, ENST00000436441, ENST00000372169</i>                   | ,<br><i>c.6049A&gt;G, c.775A&gt;G, c.6049A&gt;G</i>           | <i>l, p.Met2017Val, l, p.Met259Val, p.Met2017Val</i>         | <i>0, 0</i>       | <i>1, 1</i>       |               |                |                |                |                |  |
| SETX        | synonymous      | *ENST00000224140, ENST00000436441, ENST00000372169, ENST00000393220        | c.6507G>A, c.1233G>A, c.6507G>A, c.6507G>A                    | p.(=), p.(=), p.(=), p.(=)                                   | , , ,             | , , ,             | 50,0,0        | 383,7,0        | 279,16,0       | 4760,208,5     | 7653,231,5     |  |
| SETX        | missense        | *ENST00000224140, ENST00000393220, ENST00000372169                         | c.654G>C, c.654G>C, c.654G>C                                  | p.Lys218Asn, p.Lys218Asn, p.Lys218Asn                        | 1, 1, 1           | 2, 2, 2           | 50,0,0        | 391,0,0        | 279,1,0        | 4951,7,0       | 7867,7,0       |  |
| <b>SETX</b> | <b>missense</b> | <b>*ENST00000224140, ENST00000393220, ENST00000436441, ENST00000372169</b> | <b>c.6848C&gt;A, c.6848C&gt;A, c.1574C&gt;A, c.6848C&gt;A</b> | <b>p.Thr2283Lys, p.Thr2283Lys, p.Thr525Lys, p.Thr2283Lys</b> | <b>1, 1, 1, 1</b> | <b>2, 2, 2, 2</b> | <b>48,0,0</b> | <b>357,3,0</b> | <b>241,8,0</b> | <b>241,8,0</b> | <b>241,8,0</b> |  |
| SETX        | missense        | *ENST00000224140, ENST00000393220, ENST00000372169                         | c.710A>G, c.710A>G, c.710A>G                                  | p.Tyr237Cys, p.Tyr237Cys, p.Tyr237Cys                        | 1, 1, 1           | 2, 2, 2           | 50,0,0        | 386,1,0        | 272,1,0        | 4570,3,0       | 6773,3,0       |  |
| SETX        | synonymous      | *ENST00000224140, ENST00000372169, ENST00000436441                         | c.7119T>C, c.7119T>C, c.1845T>C                               | p.(=), p.(=), p.(=)                                          | , ,               | , ,               | 50,0,0        | 389,1,0        | 293,0,0        | 293,0,0        | 293,0,0        |  |
| SETX        | missense        | *ENST00000224140, ENST00000372169, ENST00000436441                         | c.7139G>A, c.7139G>A, c.1865G>A                               | p.Arg2380Gln, p.Arg2380Gln, p.Arg622Gln                      | 0, 0, 0           | 2, 1, 1           | 49,1,0        | 387,0,0        | 283,2,0        | 4582,3,0       | 6785,3,0       |  |
| SETX        | missense        | *ENST00000224140, ENST00000393220, ENST00000372169, ENST00000436441        | c.7406T>C, c.7307T>C, c.7493T>C, c.2219T>C                    | p.Leu2469Pro, p.Leu2436Pro, p.Leu2498Pro, p.Leu740Pro        | 0, 0, 0, 0        | 0, 0, 0, 0        | 50,0,0        | 390,0,0        | 302,1,0        | 4601,2,0       | 6804,2,0       |  |

|             |                 |                                                                              |                                                          |                                                                        |                       |                       |              |                 |                 |                 |                 |
|-------------|-----------------|------------------------------------------------------------------------------|----------------------------------------------------------|------------------------------------------------------------------------|-----------------------|-----------------------|--------------|-----------------|-----------------|-----------------|-----------------|
| SETX        | synonymous      | *ENST00000224140,<br>ENST00000372169,<br>ENST00000436441,<br>ENST00000393220 | c.7524A>G,<br>c.7611A>G,<br>c.2337A>G,<br>c.7425A>G      | p.(=), p.(=),<br>p.(=), p.(=)                                          | '''                   | '''                   | 50,0,0       | 390,0,0         | 303,1,0         | 303,1,0         | 303,1,0         |
| SETX        | synonymous      | *ENST00000224140,<br>ENST00000436441,<br>ENST00000372169,<br>ENST00000393220 | c.7590T>A,<br>c.2403T>A,<br>c.7677T>A,<br>c.7491T>A      | p.(=), p.(=),<br>p.(=), p.(=)                                          | '''                   | '''                   | 50,0,0       | 388,1,0         | 303,0,0         | 303,0,0         | 303,0,0         |
| SETX        | missense        | *ENST00000224140,<br>ENST00000372169,<br>ENST00000436441,<br>ENST00000393220 | c.7640T>C,<br>c.7727T>C,<br>c.2453T>C,<br>c.7541T>C      | p.Ile2547Thr,<br>p.Ile2576Thr,<br>p.Ile818Thr,<br>p.Ile2514Thr         | 0, 0,<br>0, 0         | 0, 0,<br>0, 0         | 50,0,0       | 378,10,0        | 305,0,0         | 4913,69,1       | 7824,74,1       |
| SETX        | missense        | *ENST00000224140,<br>ENST00000393220,<br>ENST00000436441,<br>ENST00000372169 | c.7645G>A,<br>c.7546G>A,<br>c.2458G>A,<br>c.7732G>A      | p.Val2549Ile,<br>p.Val2516Ile,<br>p.Val820Ile,<br>p.Val2578Ile         | 1, 1,<br>0, 0         | 0, 0,<br>0, 0         | 50,0,0       | 387,2,0         | 305,0,0         | 4605,0,0        | 6807,1,0        |
| SETX        | missense        | *ENST00000224140,<br>ENST00000393220,<br>ENST00000436441,<br>ENST00000372169 | c.7682C>T,<br>c.7583C>T,<br>c.2495C>T,<br>c.7769C>T      | p.Ser2561Leu<br>,<br>p.Ser2528Leu<br>,<br>p.Ser832Leu,<br>p.Ser2590Leu | 0, 0,<br>0, 0         | 0, 0,<br>0, 0         | 50,0,0       | 356,2,0         | 253,0,0         | 4552,1,0        | 6755,1,0        |
| SETX        | missense        | *ENST00000224140,<br>ENST00000393220,<br>ENST00000436441,<br>ENST00000372169 | c.7709C>T,<br>c.7610C>T,<br>c.2522C>T,<br>c.7796C>T      | p.Pro2570Leu<br>,<br>p.Pro2537Leu<br>,<br>p.Pro841Leu,<br>p.Pro2599Leu | 1, 1,<br>0, 1         | 0, 0,<br>0, 0         | 50,0,0       | 362,0,0         | 297,1,0         | 297,1,0         | 297,1,0         |
| SETX        | missense        | *ENST00000224140,<br>ENST00000372169,<br>ENST00000393220,<br>ENST00000436441 | c.7759A>G,<br>c.7846A>G,<br>c.7660A>G,<br>c.2572A>G      | p.Ile2587Val,<br>p.Ile2616Val,<br>p.Ile2554Val,<br>p.Ile858Val         | 0, 0,<br>0, 0         | 0, 0,<br>0, 0         | 22,20,4      | 160,154,28      | 145,115,15      | 2472,2065,416   | 2770,3162,1937  |
| <b>SETX</b> | <b>missense</b> | <b>*ENST00000224140,<br/>ENST00000372169,<br/>ENST00000436441,</b>           | <b>c.7787C&gt;G,<br/>c.7874C&gt;G,<br/>c.2600C&gt;G,</b> | <b>p.Ala2596Gly<br/>,<br/>p.Ala2625Gly</b>                             | <b>1, 1,<br/>0, 1</b> | <b>0, 0,<br/>0, 0</b> | <b>9,4,0</b> | <b>125,19,0</b> | <b>142,16,0</b> | <b>142,16,0</b> | <b>142,16,0</b> |

|             |            |                                                                                                                      |                                                                               |                                                                             |                        |                        |        |          |          |            |               |
|-------------|------------|----------------------------------------------------------------------------------------------------------------------|-------------------------------------------------------------------------------|-----------------------------------------------------------------------------|------------------------|------------------------|--------|----------|----------|------------|---------------|
|             |            | <b>ENST00000393220</b>                                                                                               | <b>c.7688C&gt;G</b>                                                           | <b>,<br/>p.Ala867Gly,<br/>p.Ala2563Gly</b>                                  |                        |                        |        |          |          |            |               |
| SETX        | missense   | *ENST00000224140,<br>ENST00000393220,<br>ENST00000436441,<br>ENST00000372169                                         | c.7834A>G,<br>c.7735A>G,<br>c.2647A>G,<br>c.7921A>G                           | p.Ser2612Gly,<br>p.Ser2579Gly,<br>p.Ser883Gly,<br>p.Ser2641Gly              | 0, 0,<br>0, 0          | 0, 0,<br>0, 0          | 34,2,0 | 202,19,1 | 176,15,0 | 4611,252,6 | 6595,1076,114 |
| SETX        | synonymous | *ENST00000224140,<br>ENST00000393220,<br>ENST00000436441,<br>ENST00000372169                                         | c.7944C>T,<br>c.7845C>T,<br>c.2757C>T,<br>c.8031C>T                           | p.(=), p.(=),<br>p.(=), p.(=)                                               | ,, ,                   | ,, ,                   | 37,0,0 | 220,1,0  | 180,0,0  | 4479,1,0   | 6682,1,0      |
| SETX        | missense   | *ENST00000224140,<br>ENST00000372169,<br>ENST00000393220                                                             | c.814C>G,<br>c.814C>G,<br>c.814C>G                                            | p.His272Asp,<br>p.His272Asp,<br>p.His272Asp                                 | 1, 1,<br>1             | 2, 2,<br>2             | 50,0,0 | 386,1,0  | 280,0,0  | 280,0,0    | 280,0,0       |
| SIGMAR<br>1 | missense   | *ENST00000277010,<br>ENST00000378892,<br>ENST00000477726                                                             | c.595C>T,<br>c.328C>T,<br>c.502C>T                                            | p.Leu199Phe,<br>p.Leu110Phe,<br>p.Leu168Phe                                 | 0, 0,<br>1             | 0, 0,<br>0             | 14,0,0 | 169,0,0  | 139,1,0  | 4437,3,0   | 6640,3,0      |
| SIGMAR<br>1 | missense   | *ENST00000277010,<br>ENST00000378892,<br>ENST00000477726                                                             | c.622C>T,<br>c.355C>T,<br>c.529C>T                                            | p.Arg208Trp,<br>p.Arg119Trp,<br>p.Arg177Trp                                 | 1, 1,<br>1             | 2, 2,<br>2             | 13,0,0 | 161,1,0  | 127,2,0  | 4788,19,0  | 7599,123,1    |
| SPG11       | missense   | *ENST00000261866,<br>ENST00000559193,<br>ENST00000535302,<br>ENST00000558319,<br>ENST00000427534                     | c.1108G>A,<br>c.1108G>A,<br>c.1108G>A,<br>c.1108G>A,<br>c.1108G>A             | p.Glu370Lys,<br>p.Glu370Lys,<br>p.Glu370Lys,<br>p.Glu370Lys,<br>p.Glu370Lys | 0, 0,<br>0, 0,<br>0    | 0, 1,<br>0, 1,<br>2    | 50,0,0 | 376,13,0 | 280,11,0 | 4768,198,1 | 7661,216,1    |
| SPG11       | synonymous | *ENST00000261866,<br>ENST00000535302,<br>ENST00000559193,<br>ENST00000557866,<br>ENST00000427534,<br>ENST00000558319 | c.1347C>T,<br>c.1347C>T,<br>c.1347C>T,<br>c.45C>T,<br>c.1347C>T,<br>c.1347C>T | p.(=), p.(=),<br>p.(=), p.(=),<br>p.(=), p.(=)                              | ,, , ,<br>,            | ,, , ,<br>,            | 50,0,0 | 387,3,0  | 288,5,0  | 4925,44,0  | 7720,155,5    |
| SPG11       | missense   | *ENST00000261866,<br>ENST00000558319,<br>ENST00000559193,<br>ENST00000557866,                                        | c.1348A>G,<br>c.1348A>G,<br>c.1348A>G,<br>c.46A>G,                            | p.Ile450Val,<br>p.Ile450Val,<br>p.Ile450Val,<br>p.Ile16Val,                 | 0, 0,<br>0, 0,<br>0, 0 | 0, 0,<br>0, 0,<br>0, 0 | 50,0,0 | 387,3,0  | 289,5,0  | 4925,45,0  | 7715,161,5    |

|       |                              |                                                                                                                      |                                                                                |                                                                                             |                        |                        |         |            |           |                    |                |  |
|-------|------------------------------|----------------------------------------------------------------------------------------------------------------------|--------------------------------------------------------------------------------|---------------------------------------------------------------------------------------------|------------------------|------------------------|---------|------------|-----------|--------------------|----------------|--|
|       |                              | ENST00000535302,<br>ENST00000427534                                                                                  | c.1348A>G,<br>c.1348A>G                                                        | p.Ile450Val,<br>p.Ile450Val                                                                 |                        |                        |         |            |           |                    |                |  |
| SPG11 | missense                     | *ENST00000261866,<br>ENST00000535302,<br>ENST00000559193,<br>ENST00000558319,<br>ENST00000557866,<br>ENST00000427534 | c.1388T>C,<br>c.1388T>C,<br>c.1388T>C,<br>c.1388T>C,<br>c.86T>C,<br>c.1388T>C  | p.Phe463Ser,<br>p.Phe463Ser,<br>p.Phe463Ser,<br>p.Phe463Ser,<br>p.Phe29Ser,<br>p.Phe463Ser  | 0, 0,<br>0, 0,<br>0, 0 | 0, 0,<br>0, 0,<br>0, 0 | 22,21,7 | 119,211,57 | 81,158,55 | 1494,2435,104<br>1 | 2163,3866,1852 |  |
| SPG11 | missense                     | *ENST00000261866,<br>ENST00000535302,<br>ENST00000427534,<br>ENST00000558319,<br>ENST00000559193,<br>ENST00000557866 | c.1529G>A,<br>c.1529G>A,<br>c.1529G>A,<br>c.1529G>A,<br>c.1529G>A,<br>c.227G>A | p.Ser510Asn,<br>p.Ser510Asn,<br>p.Ser510Asn,<br>p.Ser510Asn,<br>p.Ser510Asn,<br>p.Ser76Asn  | 0, 0,<br>0, 0,<br>0, 0 | 2, 2,<br>2, 1,<br>2, 2 | 50,0,0  | 388,1,0    | 282,0,0   | 282,0,0            | 282,0,0        |  |
| SPG11 | splice region,<br>synonymous | *ENST00000261866,<br>ENST00000535302,<br>ENST00000427534,<br>ENST00000559193,<br>ENST00000558319,<br>ENST00000557866 | c.1605C>T,<br>c.1605C>T,<br>c.1605C>T,<br>c.1605C>T,<br>c.1605C>T,<br>c.303C>T | p.(=), p.(=),<br>p.(=), p.(=),<br>p.(=), p.(=)                                              | ''''<br>,              | ''''<br>,              | 48,0,0  | 356,2,0    | 236,0,0   | 4909,3,0           | 7820,3,0       |  |
| SPG11 | missense                     | *ENST00000261866,<br>ENST00000427534,<br>ENST00000557866,<br>ENST00000535302,<br>ENST00000559193,<br>ENST00000558319 | c.1698T>G,<br>c.1698T>G,<br>c.396T>G,<br>c.1698T>G,<br>c.1698T>G,<br>c.1698T>G | p.Asp566Glu,<br>p.Asp566Glu,<br>p.Asp132Glu,<br>p.Asp566Glu,<br>p.Asp566Glu,<br>p.Asp566Glu | 0, 0,<br>0, 0,<br>0, 0 | 0, 2,<br>0, 0,<br>1, 1 | 46,2,0  | 359,17,0   | 234,8,0   | 4740,177,0         | 7629,197,1     |  |
| SPG11 | missense                     | *ENST00000261866,<br>ENST00000535302,<br>ENST00000558319,<br>ENST00000559193,<br>ENST00000427534                     | c.1930A>T,<br>c.1930A>T,<br>c.1930A>T,<br>c.1930A>T,<br>c.1930A>T              | p.Thr644Ser,<br>p.Thr644Ser,<br>p.Thr644Ser,<br>p.Thr644Ser,<br>p.Thr644Ser                 | 0, 0,<br>0, 0,<br>0    | 0, 1,<br>2, 1,<br>2    | 48,1,0  | 382,0,0    | 265,0,0   | 265,0,0            | 265,0,0        |  |
| SPG11 | missense                     | *ENST00000261866,<br>ENST00000535302,<br>ENST00000427534,<br>ENST00000559193,                                        | c.2083G>A,<br>c.2083G>A,<br>c.2083G>A,<br>c.2083G>A,                           | p.Ala695Thr,<br>p.Ala695Thr,<br>p.Ala695Thr,<br>p.Ala695Thr,                                | 1, 1,<br>1, 1,<br>1    | 2, 2,<br>2, 2,<br>2    | 48,0,0  | 343,11,0   | 234,7,1   | 4786,131,1         | 7681,147,1     |  |

|              |                         |                                                                                                       |                                                                                                               |                                                           |                   |                   |               |                |                |                |                |  |
|--------------|-------------------------|-------------------------------------------------------------------------------------------------------|---------------------------------------------------------------------------------------------------------------|-----------------------------------------------------------|-------------------|-------------------|---------------|----------------|----------------|----------------|----------------|--|
|              |                         | ENST00000558319                                                                                       | c.2083G>A                                                                                                     | p.Ala695Thr                                               |                   |                   |               |                |                |                |                |  |
| SPG11        | missense, splice region | *ENST00000261866, ENST00000535302, ENST00000558319, ENST00000427534                                   | c.2318T>G, c.2318T>G, c.2318T>G, c.2318T>G                                                                    | p.Val773Gly, p.Val773Gly, p.Val773Gly, p.Val773Gly        | 1, 1, 1, 1        | 2, 2, 2, 2        | 29,0,0        | 272,0,0        | 166,1,0        | 4812,4,0       | 7683,4,0       |  |
| <b>SPG11</b> | <b>missense</b>         | <b>*ENST00000261866, ENST00000558319, ENST00000427534, ENST00000535302</b>                            | <b>c.2377G&gt;A</b> ,<br>,<br><b>c.2377G&gt;A</b> ,<br>,<br><b>c.2377G&gt;A</b> ,<br>,<br><b>c.2377G&gt;A</b> | <b>p.Val793Met, p.Val793Met, p.Val793Met, p.Val793Met</b> | <b>1, 1, 1, 0</b> | <b>0, 0, 2, 0</b> | <b>44,0,0</b> | <b>345,2,0</b> | <b>212,3,0</b> | <b>212,3,0</b> | <b>212,3,0</b> |  |
| SPG11        | missense                | *ENST00000261866, ENST00000558319, ENST00000535302, ENST00000427534                                   | c.2577A>C, c.2577A>C, c.2577A>C, c.2577A>C                                                                    | p.Gln859His, p.Gln859His, p.Gln859His, p.Gln859His        | 0, 0, 0, 0        | 0, 0, 1, 0        | 50,0,0        | 379,1,0        | 267,0,0        | 267,0,0        | 267,0,0        |  |
| SPG11        | synonymous              | *ENST00000261866, ENST00000558319, ENST00000535302, ENST00000427534                                   | c.2887A>C, c.2887A>C, c.2887A>C, c.2887A>C                                                                    | p.(=), p.(=), p.(=), p.(=)                                | ,, ,              | ,, ,              | 49,1,0        | 387,1,0        | 279,2,0        | 4943,14,0      | 7852,16,0      |  |
| SPG11        | missense, splice region | *ENST00000261866, ENST00000535302, ENST00000558319, ENST00000427534                                   | c.3037A>G, c.3037A>G, c.3037A>G, c.3037A>G                                                                    | p.Lys1013Glu, p.Lys1013Glu, p.Lys1013Glu, p.Lys1013Glu    | 0, 0, 0, 0        | 0, 0, 0, 0        | 49,1,0        | 375,7,0        | 269,2,0        | 4811,135,1     | 7712,145,1     |  |
| SPG11        | synonymous              | *ENST00000261866, ENST00000559754, ENST00000558988, ENST00000427534, ENST00000535302, ENST00000558319 | c.3420G>A, c.149G>A, c.147G>A, c.3420G>A, c.3420G>A, c.3420G>A                                                | p.(=), p.(=), p.(=), p.(=), p.(=), p.(=)                  | ,, , , ,          | ,, , , ,          | 44,6,0        | 355,35,0       | 259,25,2       | 4455,490,17    | 7301,554,18    |  |
| SPG11        | missense                | *ENST00000261866, ENST00000559754, ENST00000427534, ENST00000558319, ENST00000558988,                 | c.3446T>C, c.175T>C, c.3446T>C, c.3446T>C, c.173T>C,                                                          | p.Leu1149Pro , p.Leu59Pro, p.Leu1149Pro , p.Leu1149Pro    | 1, 1, 1, 1, 1, 1  | 2, 2, 2, 2, 2, 2  | 50,0,0        | 391,0,0        | 285,1,0        | 285,1,0        | 285,1,0        |  |

|       |            |                                                                                                  |                                                                  |                                                                                 |                     |                     |        |         |         |           |           |           |
|-------|------------|--------------------------------------------------------------------------------------------------|------------------------------------------------------------------|---------------------------------------------------------------------------------|---------------------|---------------------|--------|---------|---------|-----------|-----------|-----------|
|       |            | ENST00000535302                                                                                  | c.3446T>C                                                        | , p.Leu58Pro,<br>p.Leu1149Pro                                                   |                     |                     |        |         |         |           |           |           |
| SPG11 | missense   | *ENST00000261866,<br>ENST00000427534,<br>ENST00000558988,<br>ENST00000535302,<br>ENST00000558319 | c.3680A>G,<br>c.3680A>G,<br>c.407A>G,<br>c.3680A>G,<br>c.3680A>G | p.Lys1227Arg,<br>p.Lys1227Arg,<br>p.Lys136Arg,<br>p.Lys1227Arg,<br>p.Lys1227Arg | 0, 0,<br>1, 0,<br>0 | 0, 2,<br>0, 0,<br>2 | 49,1,0 | 390,0,0 | 302,0,0 | 302,0,0   | 302,0,0   | 302,0,0   |
| SPG11 | missense   | *ENST00000261866,<br>ENST00000535302,<br>ENST00000558319,<br>ENST00000427534,<br>ENST00000559193 | c.394A>G,<br>c.394A>G,<br>c.394A>G,<br>c.394A>G,<br>c.394A>G     | p.Ser132Gly,<br>p.Ser132Gly,<br>p.Ser132Gly,<br>p.Ser132Gly,<br>p.Ser132Gly     | 0, 0,<br>0, 0,<br>0 | 0, 0,<br>0, 0,<br>0 | 50,0,0 | 390,1,0 | 279,0,0 | 279,0,0   | 279,0,0   | 279,0,0   |
| SPG11 | missense   | *ENST00000261866,<br>ENST00000427534,<br>ENST00000558319,<br>ENST00000535302                     | c.3980T>C,<br>c.3980T>C,<br>c.3980T>C,<br>c.3980T>C              | p.Ile1327Thr,<br>p.Ile1327Thr,<br>p.Ile1327Thr,<br>p.Ile1327Thr                 | 1, 1,<br>1, 1       | 0, 2,<br>0, 0       | 50,0,0 | 369,2,0 | 263,2,0 | 263,2,0   | 263,2,0   | 263,2,0   |
| SPG11 | missense   | *ENST00000261866,<br>ENST00000558319,<br>ENST00000535302,<br>ENST00000427534                     | c.3988C>G,<br>c.3988C>G,<br>c.3988C>G,<br>c.3988C>G              | p.Gln1330Glu<br>,<br>p.Gln1330Glu<br>,<br>p.Gln1330Glu<br>,<br>p.Gln1330Glu     | 0, 0,<br>0, 0       | 0, 0,<br>0, 1       | 49,0,0 | 364,3,0 | 265,1,0 | 4562,2,0  | 6760,2,0  | 6760,2,0  |
| SPG11 | synonymous | *ENST00000261866,<br>ENST00000535302,<br>ENST00000427534,<br>ENST00000558319                     | c.4026A>G,<br>c.4026A>G,<br>c.4026A>G,<br>c.4026A>G              | p.(=), p.(=),<br>p.(=), p.(=)                                                   | ,, ,                | ,, ,                | 50,0,0 | 388,3,0 | 287,2,0 | 4576,11,0 | 6774,11,0 | 6774,11,0 |
| SPG11 | synonymous | *ENST00000261866,<br>ENST00000558319,<br>ENST00000427534,<br>ENST00000535302                     | c.4260C>T,<br>c.4260C>T,<br>c.4260C>T,<br>c.4260C>T              | p.(=), p.(=),<br>p.(=), p.(=)                                                   | ,, ,                | ,, ,                | 50,0,0 | 389,0,0 | 295,1,0 | 4590,4,0  | 6788,4,0  | 6788,4,0  |
| SPG11 | missense   | *ENST00000261866,<br>ENST00000427534,<br>ENST00000535302,<br>ENST00000558319                     | c.4261G>A,<br>c.4261G>A,<br>c.4261G>A,<br>c.4261G>A              | p.Asp1421As<br>n,<br>p.Asp1421As<br>n,                                          | 0, 0,<br>0, 0       | 0, 0,<br>0, 0       | 50,0,0 | 389,0,0 | 288,2,0 | 666,2,0   | 1378,3,0  | 1378,3,0  |



|       |                                               |                                                                                                  |                                                                                                                                        |                                                                                                                                         |               |               |               |                |                |                |                |                |
|-------|-----------------------------------------------|--------------------------------------------------------------------------------------------------|----------------------------------------------------------------------------------------------------------------------------------------|-----------------------------------------------------------------------------------------------------------------------------------------|---------------|---------------|---------------|----------------|----------------|----------------|----------------|----------------|
|       |                                               |                                                                                                  |                                                                                                                                        | p.Asp1421Asn,<br>p.Asp1421Asn                                                                                                           |               |               |               |                |                |                |                |                |
| SPG11 | missense                                      | *ENST00000261866,<br>ENST00000427534,<br>ENST00000558319,<br>ENST00000535302                     | c.4343G>A,<br>c.4343G>A,<br>c.4343G>A,<br>c.4343G>A                                                                                    | p.Cys1448Tyr<br>,<br>p.Cys1448Tyr<br>,<br>p.Cys1448Tyr<br>,<br>p.Cys1448Tyr                                                             | 1, 1,<br>1, 1 | 1, 0,<br>1, 1 | 50,0,0        | 387,1,0        | 300,0,0        | 300,0,0        | 300,0,0        | 300,0,0        |
| SPG11 | missense,<br>splice region                    | *ENST00000261866,<br>ENST00000558319,<br>ENST00000427534,<br>ENST00000535302                     | c.5121G>T,<br>c.5121G>T,<br>c.5121G>T,<br>c.5121G>T                                                                                    | p.Glu1707Asp<br>,<br>p.Glu1707Asp<br>,<br>p.Glu1707Asp<br>,<br>p.Glu1707Asp                                                             | 1, 1,<br>1, 1 | 1, 1,<br>2, 1 | 50,0,0        | 389,0,0        | 302,1,0        | 4968,11,0      | 7878,12,0      |                |
| SPG11 | synonymous                                    | *ENST00000261866,<br>ENST00000558319,<br>ENST00000427534,<br>ENST00000535302,<br>ENST00000559511 | c.5361C>T,<br>c.5361C>T,<br>c.5361C>T,<br>c.5361C>T,<br>c.209C>T                                                                       | p.(=), p.(=),<br>p.(=), p.(=),<br>p.(=)                                                                                                 | ,, , , ,      | ,, , , ,      | 46,1,0        | 340,1,0        | 243,0,0        | 4916,3,0       | 7826,4,0       |                |
| SPG11 | <i>feature<br/>truncation,<br/>frameshift</i> | *ENST00000261866,<br>ENST00000558319,<br>ENST00000427534,<br>ENST00000535302,<br>ENST00000559511 | <b>c.5757_57<br/>58delAG,<br/>c.5757_57<br/>58delAG,<br/>c.5757_57<br/>58delAG,<br/>c.5757_57<br/>58delAG,<br/>c.605_606<br/>delAG</b> | <b>p.Glu1921Ser<br/>fsX2,<br/>p.Glu1921Ser<br/>fsX2,<br/>p.Glu1921Ser<br/>fsX2,<br/>p.Glu1921Ser<br/>fsX2,<br/>p.Glu204Serf<br/>sX2</b> | ,, , , ,      | ,, , , ,      | <b>50,0,0</b> | <b>389,1,0</b> | <b>302,0,0</b> | <b>302,0,0</b> | <b>302,0,0</b> | <b>302,0,0</b> |
| SPG11 | synonymous                                    | *ENST00000261866,<br>ENST00000427534,                                                            | c.5796T>C,<br>c.5796T>C,                                                                                                               | p.(=), p.(=),<br>p.(=), p.(=),                                                                                                          | ,, , , ,      | ,, , , ,      | 50,0,0        | 380,0,0        | 299,1,0        | 4596,2,0       | 6794,2,0       |                |

|       |            |                                                                                                  |                                                                  |                                                                                |                     |                     |        |         |         |           |            |         |
|-------|------------|--------------------------------------------------------------------------------------------------|------------------------------------------------------------------|--------------------------------------------------------------------------------|---------------------|---------------------|--------|---------|---------|-----------|------------|---------|
|       |            | ENST00000559511,<br>ENST00000535302,<br>ENST00000558319                                          | c.644T>C,<br>c.5796T>C,<br>c.5796T>C                             | p.(=)                                                                          |                     |                     |        |         |         |           |            |         |
| SPG11 | missense   | *ENST00000261866,<br>ENST00000558319,<br>ENST00000427534                                         | c.5911A>G,<br>c.5911A>G,<br>c.5911A>G                            | p.Asn1971Asp,<br>p.Asn1971Asp,<br>p.Asn1971Asp                                 | 0, 0,<br>0          | 0, 0,<br>0          | 50,0,0 | 383,0,0 | 293,1,0 | 293,1,0   | 293,1,0    | 293,1,0 |
| SPG11 | missense   | *ENST00000261866,<br>ENST00000427534,<br>ENST00000558138,<br>ENST00000535302                     | c.6224A>G,<br>c.6224A>G,<br>c.23A>G,<br>c.5885A>G                | p.Asn2075Ser,<br>,<br>p.Asn2075Ser,<br>, p.Asn8Ser,<br>p.Asn1962Ser            | 0, 0,<br>0, 0       | 0, 0,<br>0, 0       | 50,0,0 | 387,1,0 | 296,3,0 | 4925,50,0 | 7830,56,0  |         |
| SPG11 | synonymous | *ENST00000261866,<br>ENST00000558138,<br>ENST00000427534,<br>ENST00000535302                     | c.6258G>T,<br>c.57G>T,<br>c.6258G>T,<br>c.5919G>T                | p.(=), p.(=),<br>p.(=), p.(=)                                                  | , , ,               | , , ,               | 49,1,0 | 385,4,0 | 294,3,0 | 4916,57,0 | 7816,68,0  |         |
| SPG11 | synonymous | *ENST00000261866,<br>ENST00000535302,<br>ENST00000558138,<br>ENST00000427534                     | c.6330G>A,<br>c.5991G>A,<br>c.129G>A,<br>c.6330G>A               | p.(=), p.(=),<br>p.(=), p.(=)                                                  | , , ,               | , , ,               | 50,0,0 | 385,3,0 | 289,5,0 | 4917,53,0 | 7690,182,9 |         |
| SPG11 | missense   | *ENST00000261866,<br>ENST00000427534,<br>ENST00000559511,<br>ENST00000535302                     | c.6497T>C,<br>c.6497T>C,<br>c.868T>C,<br>c.6158T>C               | p.Ile2166Thr,<br>p.Ile2166Thr,<br>p.Ile290Thr,<br>p.Ile2053Thr                 | 1, 1,<br>1, 1       | 2, 2,<br>2, 1       | 50,0,0 | 386,1,0 | 303,0,0 | 4598,1,0  | 6794,1,0   |         |
| SPG11 | missense   | *ENST00000261866,<br>ENST00000535302,<br>ENST00000559511,<br>ENST00000427534,<br>ENST00000558138 | c.6632G>A,<br>c.6293G>A,<br>c.1003G>A,<br>c.6632G>A,<br>c.323G>A | p.Arg2211His,<br>p.Arg2098His,<br>p.Arg335His,<br>p.Arg2211His,<br>p.Arg108His | 0, 0,<br>0, 0,<br>0 | 0, 0,<br>0, 2,<br>0 | 48,1,0 | 359,3,0 | 294,0,0 | 4577,15,0 | 6775,15,0  |         |
| SPG11 | missense   | *ENST00000261866,<br>ENST00000535302,<br>ENST00000559511,<br>ENST00000558138                     | c.6872G>A,<br>c.6533G>A,<br>c.1243G>A,<br>c.563G>A               | p.Cys2291Tyr,<br>,<br>p.Cys2178Tyr,<br>, p.Cys415Tyr,                          | 1, 1,<br>1, 1       | 2, 2,<br>2, 2       | 50,0,0 | 383,0,0 | 302,1,0 | 302,1,0   | 302,1,0    | 302,1,0 |

|       |                                       |                                                                                      |                                                         |                                                                                 |            |               |        |          |          |            |            |          |
|-------|---------------------------------------|--------------------------------------------------------------------------------------|---------------------------------------------------------|---------------------------------------------------------------------------------|------------|---------------|--------|----------|----------|------------|------------|----------|
|       |                                       |                                                                                      |                                                         | p.Cys188Tyr                                                                     |            |               |        |          |          |            |            |          |
| SPG11 | <i>feature elongation, frameshift</i> | <i>*ENST00000261866, ENST00000558138, ENST00000535302, ENST00000559511</i>           | <i>c.6952dup C, c.643dupC, c.6613dup C, c.1323dup C</i> | <i>p.Arg2318ProfsX22, p.Arg215ProfsX22, p.Arg2205ProfsX22, p.Arg442ProfsX22</i> | '''        | '''           | 30,5,0 | 156,51,0 | 166,44,0 | 166,44,0   | 166,44,0   | 166,44,0 |
| SPG11 | synonymous                            | *ENST00000261866, ENST00000558138, ENST00000535302, ENST00000559511                  | c.7023C>T, c.714C>T, c.6684C>T, c.1394C>T               | p.(=), p.(=), p.(=), p.(=)                                                      | '''        | '''           | 46,4,0 | 353,30,0 | 257,18,0 | 4652,299,0 | 7533,328,1 |          |
| SPG11 | missense                              | *ENST00000261866, ENST00000535302, ENST00000559511                                   | c.7069C>T, c.6730C>T, c.1440C>T                         | p.Leu2357Phe, p.Leu2244Phe, p.Leu481Phe                                         | 0, 0, 1    | 2, 2, 2       | 49,1,0 | 383,2,0  | 275,1,0  | 4929,23,0  | 7834,29,0  |          |
| SPG11 | synonymous                            | *ENST00000261866, ENST00000559511, ENST00000535302                                   | c.7197G>A, c.1568G>A, c.6858G>A                         | p.(=), p.(=), p.(=)                                                             | ''         | ''            | 50,0,0 | 382,7,0  | 278,4,0  | 4838,120,0 | 7740,129,0 |          |
| SPG11 | missense                              | *ENST00000261866, ENST00000535302, ENST00000559511                                   | c.7324G>C, c.6985G>C, c.1695G>C                         | p.Ala2442Pro, p.Ala2329Pro, p.Ala566Pro                                         | 1, 1, 1    | 2, 2, 2       | 50,0,0 | 390,1,0  | 282,0,0  | 282,0,0    | 282,0,0    |          |
| SPG11 | missense                              | *ENST00000261866, ENST00000427534, ENST00000559193, ENST00000535302, ENST00000558319 | c.808G>A, c.808G>A, c.808G>A, c.808G>A, c.808G>A        | p.Val270Ile, p.Val270Ile, p.Val270Ile, p.Val270Ile, p.Val270Ile                 | 0, 0, 0, 0 | 1, 2, 2, 1, 2 | 50,0,0 | 389,1,0  | 282,4,0  | 4865,97,0  | 7729,144,0 |          |
| SPG11 | missense                              | *ENST00000261866, ENST00000559193, ENST00000427534, ENST00000558319, ENST00000535302 | c.979C>G, c.979C>G, c.979C>G, c.979C>G, c.979C>G        | p.Leu327Val, p.Leu327Val, p.Leu327Val, p.Leu327Val, p.Leu327Val                 | 0, 0, 0, 0 | 0, 1, 0, 0, 0 | 50,0,0 | 386,0,0  | 274,1,0  | 651,2,0    | 1364,2,0   |          |

|        |                             |                                                                                                                                  |                                                                                                                                                                           |                                                                                                         |                                 |                        |               |               |               |               |                |
|--------|-----------------------------|----------------------------------------------------------------------------------------------------------------------------------|---------------------------------------------------------------------------------------------------------------------------------------------------------------------------|---------------------------------------------------------------------------------------------------------|---------------------------------|------------------------|---------------|---------------|---------------|---------------|----------------|
| TARDBP | synonymous                  | *ENST00000240185,<br>ENST00000439080                                                                                             | c.1122T>C,<br>c.774T>C                                                                                                                                                    | p.(=), p.(=)                                                                                            | ,                               | ,                      | 50,0,0        | 385,0,0       | 301,1,0       | 4601,1,0      | 6803,2,0       |
| TARDBP | missense                    | *ENST00000240185,<br>ENST00000439080                                                                                             | c.1129T>A,<br>c.781T>A                                                                                                                                                    | p.Ser377Thr,<br>p.Ser261Thr                                                                             | 0, 0                            | 1, 1                   | 50,0,0        | 386,0,0       | 302,1,0       | 302,1,0       | 302,1,0        |
| TARDBP | synonymous                  | *ENST00000240185,<br>ENST00000473118,<br>ENST00000315091,<br>ENST00000476201                                                     | c.312C>T,<br>c.312C>T,<br>c.312C>T,<br>c.435C>T                                                                                                                           | p.(=), p.(=),<br>p.(=), p.(=)                                                                           | ''''                            | ''''                   | 50,0,0        | 382,1,0       | 270,0,0       | 270,0,0       | 270,0,0        |
| TARDBP | missense                    | *ENST00000240185,<br>ENST00000439080                                                                                             | c.859G>A,<br>c.511G>A                                                                                                                                                     | p.Gly287Ser,<br>p.Gly171Ser                                                                             | 0, 0                            | 0, 0                   | 50,0,0        | 388,2,0       | 300,0,0       | 300,0,0       | 300,0,0        |
| TARDBP | synonymous                  | *ENST00000240185,<br>ENST00000439080                                                                                             | c.975C>T,<br>c.627C>T                                                                                                                                                     | p.(=), p.(=)                                                                                            | ,                               | ,                      | 49,0,0        | 363,1,0       | 272,2,0       | 272,2,0       | 272,2,0        |
| UNC13A | missense                    | *ENST00000519716,<br>ENST00000428389,<br>ENST00000252773,<br>ENST00000552293,<br>ENST00000551649,<br>ENST00000550896             | c.1031T>C,<br>c.1295T>C,<br>c.1031T>C,<br>c.1031T>C,<br>c.1031T>C,<br>c.1031T>C                                                                                           | p.Leu344Pro,<br>p.Leu432Pro,<br>p.Leu344Pro,<br>p.Leu344Pro,<br>p.Leu344Pro,<br>p.Leu344Pro             | 0, 0,<br>0, 0,<br>0, 0,<br>0, 0 | 0, 0,<br>0, 0,<br>0, 2 | 15,2,0        | 109,4,0       | 96,2,0        | 4219,15,0     | 6313,16,0      |
| UNC13A | <i>inframe<br/>deletion</i> | <i>*ENST00000519716,<br/>ENST00000252773,<br/>ENST00000428389,<br/>ENST00000552293,<br/>ENST00000551649,<br/>ENST00000550896</i> | <i>c.1049_10<br/>51delAGG,<br/>c.1049_10<br/>51delAGG,<br/>c.1313_13<br/>15delAGG,<br/>c.1049_10<br/>51delAGG,<br/>c.1049_10<br/>51delAGG,<br/>c.1049_10<br/>51delAGG</i> | <i>p.Glu350del,<br/>p.Glu350del,<br/>p.Glu438del,<br/>p.Glu350del,<br/>p.Glu350del,<br/>p.Glu350del</i> | <i>''''<br/>,</i>               | <i>''''<br/>,</i>      | <i>14,0,0</i> | <i>89,6,0</i> | <i>67,7,0</i> | <i>67,7,0</i> | <i>67,7,0</i>  |
| UNC13A | missense                    | *ENST00000519716,<br>ENST00000551649,<br>ENST00000428389,<br>ENST00000252773,<br>ENST00000550896,                                | c.1075G>A,<br>c.1075G>A,<br>c.1339G>A,<br>c.1075G>A,<br>c.1075G>A,                                                                                                        | p.Ala359Thr,<br>p.Ala359Thr,<br>p.Ala447Thr,<br>p.Ala359Thr,<br>p.Ala359Thr,                            | 0, 0,<br>0, 0,<br>0, 0          | 0, 0,<br>0, 0,<br>1, 0 | 7,14,3        | 38,85,17      | 32,70,10      | 1562,2142,979 | 3649,2792,1092 |

|               |                              |                                                                                                                                  |                                                                                                               |                                                                                        |                                 |                                 |               |                |                |                 |                 |  |
|---------------|------------------------------|----------------------------------------------------------------------------------------------------------------------------------|---------------------------------------------------------------------------------------------------------------|----------------------------------------------------------------------------------------|---------------------------------|---------------------------------|---------------|----------------|----------------|-----------------|-----------------|--|
|               |                              | ENST00000552293                                                                                                                  | c.1075G>A                                                                                                     | p.Ala359Thr                                                                            |                                 |                                 |               |                |                |                 |                 |  |
| <b>UNC13A</b> | <i>synonymous</i>            | <b>*ENST00000519716,<br/>ENST00000428389,<br/>ENST00000550896,<br/>ENST00000252773,<br/>ENST00000551649,<br/>ENST00000552293</b> | <b>c.1188C&gt;T,<br/>c.1452C&gt;T,<br/>c.1188C&gt;T,<br/>c.1188C&gt;T,<br/>c.1188C&gt;T,<br/>c.1188C&gt;T</b> | <b>p.(=), p.(=),<br/>p.(=), p.(=),<br/>p.(=), p.(=)</b>                                | <b>''''<br/>,</b>               | <b>''''<br/>,</b>               | <b>1,0,0</b>  | <b>5,0,0</b>   | <b>3,0,0</b>   | <b>4155,6,0</b> | <b>6144,6,0</b> |  |
| UNC13A        | synonymous                   | *ENST00000519716,<br>ENST00000551649,<br>ENST00000552293,<br>ENST00000428389,<br>ENST00000252773,<br>ENST00000550896             | c.1368C>T,<br>c.1368C>T,<br>c.1368C>T,<br>c.1632C>T,<br>c.1368C>T,<br>c.1368C>T                               | p.(=), p.(=),<br>p.(=), p.(=),<br>p.(=), p.(=)                                         | ''''<br>,                       | ''''<br>,                       | 20,2,0        | 81,0,0         | 71,2,0         | 4334,20,0       | 6519,20,0       |  |
| UNC13A        | splice region,<br>synonymous | *ENST00000519716,<br>ENST00000552293,<br>ENST00000550896,<br>ENST00000428389,<br>ENST00000551649,<br>ENST00000252773             | c.153C>T,<br>c.153C>T,<br>c.153C>T,<br>c.417C>T,<br>c.153C>T,<br>c.153C>T                                     | p.(=), p.(=),<br>p.(=), p.(=),<br>p.(=), p.(=)                                         | ''''<br>,                       | ''''<br>,                       | 48,1,0        | 360,2,0        | 302,3,0        | 4424,12,0       | 6330,12,0       |  |
| UNC13A        | synonymous                   | *ENST00000519716,<br>ENST00000551649,<br>ENST00000428389,<br>ENST00000550896,<br>ENST00000552293,<br>ENST00000252773             | c.1767C>G,<br>c.1767C>G,<br>c.2031C>G,<br>c.1761C>G,<br>c.1767C>G,<br>c.1767C>G                               | p.(=), p.(=),<br>p.(=), p.(=),<br>p.(=), p.(=)                                         | ''''<br>,                       | ''''<br>,                       | 25,5,0        | 108,38,3       | 64,12,3        | 3943,781,33     | 6017,1536,119   |  |
| UNC13A        | missense                     | *ENST00000519716,<br>ENST00000252773,<br>ENST00000551649,<br>ENST00000552293,<br>ENST00000550896,<br>ENST00000428389             | c.182C>T,<br>c.182C>T,<br>c.182C>T,<br>c.182C>T,<br>c.182C>T,<br>c.446C>T                                     | p.Thr61Met,<br>p.Thr61Met,<br>p.Thr61Met,<br>p.Thr61Met,<br>p.Thr61Met,<br>p.Thr149Met | 0, 0,<br>0, 0,<br>0, 0          | 1, 2,<br>1, 1,<br>2, 2          | 50,0,0        | 366,1,0        | 296,1,0        | 4810,19,0       | 7475,24,0       |  |
| <b>UNC13A</b> | <i>missense</i>              | <b>*ENST00000519716,<br/>ENST00000551649,<br/>ENST00000428389,<br/>ENST00000252773,</b>                                          | <b>c.2068G&gt;A<br/>,<br/>c.2068G&gt;A<br/>,</b>                                                              | <b>p.Ala690Thr,<br/>p.Ala690Thr,<br/>p.Ala778Thr,<br/>p.Ala690Thr,</b>                 | <b>1, 1,<br/>1, 1,<br/>1, 1</b> | <b>2, 2,<br/>2, 2,<br/>1, 2</b> | <b>45,0,0</b> | <b>291,0,0</b> | <b>269,1,0</b> | <b>269,1,0</b>  | <b>269,1,0</b>  |  |

|               |                            |                                                                                                                                                                |                                                                                                                                             |                                                                                                                                       |                                             |                                            |               |                 |                 |                 |                 |  |
|---------------|----------------------------|----------------------------------------------------------------------------------------------------------------------------------------------------------------|---------------------------------------------------------------------------------------------------------------------------------------------|---------------------------------------------------------------------------------------------------------------------------------------|---------------------------------------------|--------------------------------------------|---------------|-----------------|-----------------|-----------------|-----------------|--|
|               |                            | <i>ENST00000550896,</i><br><i>ENST00000552293</i>                                                                                                              | <i>c.2332G&gt;A</i><br>,<br><i>c.2068G&gt;A</i><br>,<br><i>c.2062G&gt;A</i><br>,<br><i>c.2068G&gt;A</i>                                     | <i>p.Ala688Thr,</i><br><i>p.Ala690Thr</i>                                                                                             |                                             |                                            |               |                 |                 |                 |                 |  |
| UNC13A        | synonymous                 | *ENST00000519716,<br>ENST00000428389,<br>ENST00000252773,<br>ENST00000552293,<br>ENST00000551649,<br>ENST00000550896                                           | c.2289T>C,<br>c.2553T>C,<br>c.2289T>C,<br>c.2289T>C,<br>c.2289T>C,<br>c.2283T>C                                                             | p.(=), p.(=),<br>p.(=), p.(=),<br>p.(=), p.(=)                                                                                        | ''''                                        | ''''                                       | 48,0,0        | 333,1,0         | 294,0,0         | 4559,1,0        | 6709,1,0        |  |
| <b>UNC13A</b> | <b>missense</b>            | <b>*ENST00000519716,</b><br><b>ENST00000552293,</b><br><b>ENST00000428389,</b><br><b>ENST00000550896,</b><br><b>ENST00000551649,</b><br><b>ENST00000252773</b> | <b>c.2626C&gt;A,</b><br><b>c.2626C&gt;A,</b><br><b>c.2890C&gt;A,</b><br><b>c.2620C&gt;A,</b><br><b>c.2626C&gt;A,</b><br><b>c.2626C&gt;A</b> | <b>p.Gln876Lys,</b><br><b>p.Gln876Lys,</b><br><b>p.Gln964Lys,</b><br><b>p.Gln874Lys,</b><br><b>p.Gln876Lys,</b><br><b>p.Gln876Lys</b> | <b>1, 1,</b><br><b>1, 1,</b><br><b>1, 1</b> | <b>2, 2,</b><br><b>2, ,</b><br><b>2, 2</b> | <b>36,2,0</b> | <b>214,15,0</b> | <b>180,16,0</b> | <b>180,16,0</b> | <b>180,16,0</b> |  |
| UNC13A        | missense,<br>splice region | *ENST00000519716,<br>ENST00000552293,<br>ENST00000252773,<br>ENST00000551649,<br>ENST00000428389,<br>ENST00000550896                                           | c.3080C>T,<br>c.3080C>T,<br>c.3080C>T,<br>c.3080C>T,<br>c.3344C>T,<br>c.3074C>T                                                             | p.Pro1027Leu<br>,<br>p.Pro1027Leu<br>,<br>p.Pro1027Leu<br>,<br>p.Pro1027Leu<br>,<br>p.Pro1115Leu<br>,<br>p.Pro1025Leu                 | 0, 0,<br>0, 0,<br>0, 0                      | 0, 0,<br>0, 0,<br>0, 2                     | 45,2,0        | 336,2,0         | 253,4,0         | 4383,58,0       | 6369,65,0       |  |
| UNC13A        | missense                   | *ENST00000519716,<br>ENST00000551649,<br>ENST00000428389,<br>ENST00000550896,<br>ENST00000552293,                                                              | c.3098T>A,<br>c.3098T>A,<br>c.3362T>A,<br>c.3092T>A,<br>c.3098T>A,                                                                          | p.Val1033Asp<br>,<br>p.Val1033Asp<br>,<br>p.Val1121Asp                                                                                | 0, 0,<br>0, 0,<br>0, 0                      | 0, 0,<br>0, 0,<br>0, 0                     | 49,0,0        | 371,1,0         | 286,0,0         | 286,0,0         | 286,0,0         |  |

|        |            |                                                                                                                      |                                                                                 |                                                                                                                       |                        |                        |        |          |          |             |             |  |
|--------|------------|----------------------------------------------------------------------------------------------------------------------|---------------------------------------------------------------------------------|-----------------------------------------------------------------------------------------------------------------------|------------------------|------------------------|--------|----------|----------|-------------|-------------|--|
|        |            | ENST00000252773                                                                                                      | c.3098T>A                                                                       | ,<br>p.Val1031Asp<br>,<br>p.Val1033Asp<br>,<br>p.Val1033Asp                                                           |                        |                        |        |          |          |             |             |  |
| UNC13A | missense   | *ENST00000519716,<br>ENST00000551649,<br>ENST00000428389,<br>ENST00000550896,<br>ENST00000252773,<br>ENST00000552293 | c.3101T>C,<br>c.3101T>C,<br>c.3365T>C,<br>c.3095T>C,<br>c.3101T>C,<br>c.3101T>C | p.Leu1034Pro<br>,<br>p.Leu1034Pro<br>,<br>p.Leu1122Pro<br>,<br>p.Leu1032Pro<br>,<br>p.Leu1034Pro<br>,<br>p.Leu1034Pro | 0, 0,<br>0, 0,<br>0, 0 | 0, 0,<br>0, 0,<br>0, 0 | 0,0,50 | 0,0,373  | 0,0,287  | 0,0,665     | 0,0,1378    |  |
| UNC13A | synonymous | *ENST00000519716,<br>ENST00000551649,<br>ENST00000428389,<br>ENST00000550896,<br>ENST00000552293,<br>ENST00000252773 | c.3108G>A,<br>c.3108G>A,<br>c.3372G>A,<br>c.3102G>A,<br>c.3108G>A,<br>c.3108G>A | p.(=), p.(=),<br>p.(=), p.(=),<br>p.(=), p.(=)                                                                        | ''''<br>,              | ''''<br>,              | 46,4,0 | 345,29,3 | 255,37,0 | 4245,548,16 | 6795,624,17 |  |
| UNC13A | missense   | *ENST00000519716,<br>ENST00000552293,<br>ENST00000252773,<br>ENST00000551649,<br>ENST00000550896,<br>ENST00000428389 | c.3397G>T,<br>c.3397G>T,<br>c.3397G>T,<br>c.3397G>T,<br>c.3391G>T,<br>c.3661G>T | p.Ala1133Ser,<br>p.Ala1133Ser,<br>p.Ala1133Ser,<br>p.Ala1133Ser,<br>p.Ala1131Ser,<br>p.Ala1221Ser                     | 0, 0,<br>0, 0,<br>0, 0 | 0, 0,<br>0, 0,<br>1, 0 | 40,9,1 | 306,67,0 | 260,42,0 | 4122,784,28 | 6898,851,28 |  |
| UNC13A | missense   | *ENST00000519716,<br>ENST00000428389,<br>ENST00000552293,<br>ENST00000550896,<br>ENST00000252773,<br>ENST00000551649 | c.3461A>G<br>,<br>c.3725A>G<br>,<br>c.3461A>G<br>,                              | p.Asp1154Gly<br>,<br>p.Asp1242Gly<br>,<br>p.Asp1154Gly<br>,                                                           | 1, 1,<br>1, 1,<br>1, 1 | 1, 0,<br>0, 1,<br>1, 1 | 37,0,0 | 215,3,0  | 231,7,0  | 231,7,0     | 231,7,0     |  |

|               |                   |                                                                                                                      |                                                                                  |                                                                             |                            |                            |               |                 |                 |                 |                 |  |
|---------------|-------------------|----------------------------------------------------------------------------------------------------------------------|----------------------------------------------------------------------------------|-----------------------------------------------------------------------------|----------------------------|----------------------------|---------------|-----------------|-----------------|-----------------|-----------------|--|
|               |                   |                                                                                                                      | <i>c.3455A&gt;G</i><br>,<br><i>c.3461A&gt;G</i><br>,<br><i>c.3461A&gt;G</i>      | <i>p.Asp1152Gly</i><br>,<br><i>p.Asp1154Gly</i><br>,<br><i>p.Asp1154Gly</i> |                            |                            |               |                 |                 |                 |                 |  |
| UNC13A        | synonymous        | *ENST00000519716,<br>ENST00000428389,<br>ENST00000550896,<br>ENST00000252773,<br>ENST00000552293,<br>ENST00000551649 | c.3552A>G,<br>c.3816A>G,<br>c.3546A>G,<br>c.3552A>G,<br>c.3552A>G,<br>c.3552A>G  | p.(=), p.(=),<br>p.(=), p.(=),<br>p.(=), p.(=)                              | ''''<br>,                  | ''''<br>,                  | 49,1,0        | 377,1,0         | 301,2,0         | 4864,44,0       | 7694,49,0       |  |
| UNC13A        | synonymous        | *ENST00000519716,<br>ENST00000551649,<br>ENST00000552293,<br>ENST00000252773,<br>ENST00000428389,<br>ENST00000550896 | c.3576T>C,<br>c.3576T>C,<br>c.3576T>C,<br>c.3576T>C,<br>c.3840T>C,<br>c.3570T>C  | p.(=), p.(=),<br>p.(=), p.(=),<br>p.(=), p.(=)                              | ''''<br>,                  | ''''<br>,                  | 24,23,3       | 182,162,44      | 140,130,35      | 2152,2111,638   | 2520,3078,2119  |  |
| UNC13A        | synonymous        | *ENST00000519716,<br>ENST00000252773,<br>ENST00000552293,<br>ENST00000550896,<br>ENST00000428389,<br>ENST00000551649 | c.3687C>T,<br>c.3687C>T,<br>c.3687C>T,<br>c.3681C>T,<br>c.3951C>T,<br>c.3687C>T  | p.(=), p.(=),<br>p.(=), p.(=),<br>p.(=), p.(=)                              | ''''<br>,                  | ''''<br>,                  | 50,0,0        | 346,33,1        | 273,31,0        | 4328,552,17     | 7029,650,17     |  |
| UNC13A        | synonymous        | *ENST00000519716,<br>ENST00000552293,<br>ENST00000252773,<br>ENST00000550896,<br>ENST00000428389,<br>ENST00000551649 | c.4029C>T,<br>c.4029C>T,<br>c.4029C>T,<br>c.4023C>T,<br>c.4293C>T,<br>c.4029C>T  | p.(=), p.(=),<br>p.(=), p.(=),<br>p.(=), p.(=)                              | ''''<br>,                  | ''''<br>,                  | 40,0,0        | 237,30,1        | 153,26,1        | 4251,541,18     | 7061,602,18     |  |
| <b>UNC13A</b> | <b>synonymous</b> | <b>*ENST00000519716,</b><br><b>ENST00000428389,</b><br><b>ENST00000252773,</b><br><b>ENST00000551649</b>             | <b>c.4251G&gt;A</b><br>,<br><b>c.4515G&gt;A</b><br>,<br><b>c.4251G&gt;A</b><br>, | <b>p.(=), p.(=),</b><br><b>p.(=), p.(=)</b>                                 | <b>''''</b><br><b>''''</b> | <b>''''</b><br><b>''''</b> | <b>33,1,0</b> | <b>171,20,0</b> | <b>123,19,0</b> | <b>123,19,0</b> | <b>123,19,0</b> |  |



|               |                   |                                                                                                                                  |                                                                                                               |                                                                                          |                        |                        |               |                 |                 |                    |                     |                 |
|---------------|-------------------|----------------------------------------------------------------------------------------------------------------------------------|---------------------------------------------------------------------------------------------------------------|------------------------------------------------------------------------------------------|------------------------|------------------------|---------------|-----------------|-----------------|--------------------|---------------------|-----------------|
|               |                   |                                                                                                                                  | <b>c.4251G&gt;A</b>                                                                                           |                                                                                          |                        |                        |               |                 |                 |                    |                     |                 |
| <b>UNC13A</b> | <b>missense</b>   | <b>*ENST00000519716,<br/>ENST00000428389,<br/>ENST00000252773,<br/>ENST00000551649</b>                                           | <b>c.4259C&gt;A,<br/>c.4523C&gt;A,<br/>c.4259C&gt;A,<br/>c.4259C&gt;A</b>                                     | <b>p.Pro1420Gln<br/>,<br/>p.Pro1508Gln<br/>,<br/>p.Pro1420Gln<br/>,<br/>p.Pro1420Gln</b> | <b>0, 0,<br/>0, 0</b>  | <b>0, 0,<br/>0, 0</b>  | <b>30,7,0</b> | <b>114,86,1</b> | <b>63,117,0</b> | <b>63,117,0</b>    | <b>63,117,0</b>     | <b>63,117,0</b> |
| UNC13A        | synonymous        | *ENST00000519716,<br>ENST00000428389,<br>ENST00000252773,<br>ENST00000551649,<br>ENST00000552293,<br>ENST00000550896             | c.4380G>C,<br>c.4644G>C,<br>c.4380G>C,<br>c.4380G>C,<br>c.4305G>C,<br>c.4299G>C                               | p.(=), p.(=),<br>p.(=), p.(=),<br>p.(=), p.(=)                                           | ''''<br>,              | ''''<br>,              | 45,0,0        | 299,0,0         | 255,1,0         | 255,1,0            | 255,1,0             | 255,1,0         |
| UNC13A        | synonymous        | *ENST00000519716,<br>ENST00000552293,<br>ENST00000550896,<br>ENST00000428389,<br>ENST00000252773,<br>ENST00000551649             | c.4497G>A,<br>c.4422G>A,<br>c.4416G>A,<br>c.4761G>A,<br>c.4497G>A,<br>c.4497G>A                               | p.(=), p.(=),<br>p.(=), p.(=),<br>p.(=), p.(=)                                           | ''''<br>,              | ''''<br>,              | 24,19,4       | 165,148,28      | 161,99,23       | 2827,1789,286      | 5371,2036,296       |                 |
| UNC13A        | synonymous        | *ENST00000519716,<br>ENST00000552293,<br>ENST00000252773,<br>ENST00000550896,<br>ENST00000428389,<br>ENST00000551649             | c.474G>C,<br>c.474G>C,<br>c.474G>C,<br>c.474G>C,<br>c.738G>C,<br>c.474G>C                                     | p.(=), p.(=),<br>p.(=), p.(=),<br>p.(=), p.(=)                                           | ''''<br>,              | ''''<br>,              | 1,10,39       | 12,100,270      | 4,61,233        | 89,1095,3618       | 214,1818,5405       |                 |
| <b>UNC13A</b> | <b>synonymous</b> | <b>*ENST00000519716,<br/>ENST00000552293,<br/>ENST00000551649,<br/>ENST00000252773,<br/>ENST00000550896,<br/>ENST00000428389</b> | <b>c.5079C&gt;A,<br/>c.5061C&gt;A,<br/>c.5136C&gt;A,<br/>c.5079C&gt;A,<br/>c.4998C&gt;A,<br/>c.5343C&gt;A</b> | <b>p.(=), p.(=),<br/>p.(=), p.(=),<br/>p.(=), p.(=)</b>                                  | <b>''''<br/>,</b>      | <b>''''<br/>,</b>      | <b>0,0,0</b>  | <b>0,1,0</b>    | <b>0,0,0</b>    | <b>3702,654,30</b> | <b>5596,1285,89</b> |                 |
| UNC13A        | missense          | *ENST00000519716,<br>ENST00000550896,<br>ENST00000552293,                                                                        | c.694C>T,<br>c.694C>T,<br>c.694C>T,                                                                           | p.Pro232Ser,<br>p.Pro232Ser,<br>p.Pro232Ser,                                             | 0, 0,<br>0, 0,<br>0, 0 | 0, 1,<br>0, 0,<br>0, 0 | 50,0,0        | 367,0,0         | 305,1,0         | 305,1,0            | 305,1,0             | 305,1,0         |

|        |                  |                                                                                                                      |                                                                            |                                                                                             |                        |                        |        |         |         |           |           |  |
|--------|------------------|----------------------------------------------------------------------------------------------------------------------|----------------------------------------------------------------------------|---------------------------------------------------------------------------------------------|------------------------|------------------------|--------|---------|---------|-----------|-----------|--|
|        |                  | ENST00000551649,<br>ENST00000252773,<br>ENST00000428389                                                              | c.694C>T,<br>c.694C>T,<br>c.958C>T                                         | p.Pro232Ser,<br>p.Pro232Ser,<br>p.Pro320Ser                                                 |                        |                        |        |         |         |           |           |  |
| UNC13A | synonymous       | *ENST00000519716,<br>ENST00000428389,<br>ENST00000550896,<br>ENST00000252773,<br>ENST00000552293,<br>ENST00000551649 | c.771C>G,<br>c.1035C>G,<br>c.771C>G,<br>c.771C>G,<br>c.771C>G,<br>c.771C>G | p.(=), p.(=),<br>p.(=), p.(=),<br>p.(=), p.(=)                                              | ''''                   | ''''                   | 6,0,0  | 49,3,0  | 35,3,0  | 4432,85,0 | 7098,97,0 |  |
| UNC13A | missense         | *ENST00000519716,<br>ENST00000550896,<br>ENST00000552293,<br>ENST00000551649,<br>ENST00000252773,<br>ENST00000428389 | c.905A>C,<br>c.905A>C,<br>c.905A>C,<br>c.905A>C,<br>c.905A>C,<br>c.1169A>C | p.His302Pro,<br>p.His302Pro,<br>p.His302Pro,<br>p.His302Pro,<br>p.His302Pro,<br>p.His390Pro | 0, 0,<br>0, 0,<br>0, 0 | 0, 1,<br>0, 2,<br>0, 1 | 14,1,0 | 75,5,0  | 76,3,0  | 76,3,0    | 76,3,0    |  |
| UNC13A | missense         | *ENST00000519716,<br>ENST00000551649,<br>ENST00000552293,<br>ENST00000252773,<br>ENST00000550896,<br>ENST00000428389 | c.907T>C,<br>c.907T>C,<br>c.907T>C,<br>c.907T>C,<br>c.907T>C,<br>c.1171T>C | p.Ser303Pro,<br>p.Ser303Pro,<br>p.Ser303Pro,<br>p.Ser303Pro,<br>p.Ser303Pro,<br>p.Ser391Pro | 0, 0,<br>0, 0,<br>0, 0 | 0, 2,<br>1, 2,<br>1, 1 | 11,1,0 | 70,8,0  | 72,8,0  | 72,8,0    | 72,8,0    |  |
| VAPB   | inframe deletion | *ENST00000475243                                                                                                     | c.474_476 delTTC                                                           | p.Ser159del                                                                                 |                        |                        | 50,0,0 | 386,2,0 | 278,0,0 | 278,0,0   | 278,0,0   |  |
| VAPB   | missense         | *ENST00000475243                                                                                                     | c.510G>A                                                                   | p.Met170Ile                                                                                 | 0                      | 0                      | 50,0,0 | 385,4,0 | 279,1,0 | 4939,19,0 | 7854,20,0 |  |
| VCP    | synonymous       | *ENST00000358901                                                                                                     | c.1641G>A                                                                  | p.(=)                                                                                       |                        |                        | 50,0,0 | 386,1,0 | 299,0,0 | 299,0,0   | 299,0,0   |  |
| VCP    | synonymous       | *ENST00000358901                                                                                                     | c.1704A>G                                                                  | p.(=)                                                                                       |                        |                        | 48,1,0 | 373,5,0 | 298,5,0 | 4930,50,1 | 7835,61,1 |  |
| VCP    | missense         | *ENST00000358901                                                                                                     | c.2092G>C                                                                  | p.Ala698Pro                                                                                 | 1                      | 2                      | 49,0,0 | 341,7,0 | 272,7,0 | 272,7,0   | 272,7,0   |  |
| VCP    | missense         | *ENST00000358901                                                                                                     | c.2249A>G                                                                  | p.Asn750Ser                                                                                 | 0                      | 0                      | 50,0,0 | 388,1,0 | 306,0,0 | 306,0,0   | 306,0,0   |  |
| VCP    | synonymous       | *ENST00000358901                                                                                                     | c.2406T>C                                                                  | p.(=)                                                                                       |                        |                        | 45,0,0 | 282,0,0 | 262,0,0 | 4559,3,0  | 6762,3,0  |  |

\* Denotes canonical transcript

SIFT prediction values of “0” and “1” denote “tolerated” and “deleterious” predictions respectively

PolyPhen prediction values of “0”, “1” and “2” denote “benign”, “possibly damaging” and “probably damaging” predictions respectively

Mutations failing variant quality control (supplementary materials and methods) are shown in bold/ italics. It should be noted that these are anticipated to include true variants in addition to sequencing artefacts.

**Table S3: Co-occurrence of Mendelian ALS gene variants**

| <b>*Frequency Threshold</b> | <b>Cases with 1 mutation</b> | <b>Cases with 2 mutations</b> | <b>Controls with 1 mutation</b> | <b>Controls with 2 mutations</b> | <b>**p</b> |
|-----------------------------|------------------------------|-------------------------------|---------------------------------|----------------------------------|------------|
| 0                           | 55                           | 3                             | 12                              | 0                                | 0.36       |
| 0.0005                      | 63                           | 4                             | 17                              | 0                                | 0.45       |
| 0.005                       | 79                           | 7                             | 34                              | 0                                | 0.76       |
| 0.05                        | 114                          | 16                            | 49                              | 7                                | 0.72       |

\*Denotes the cut-off carrier frequency for variants among European and Global reference cohorts. Variants exceeding a given threshold were excluded from analysis. Reference cohorts included individuals resequenced by NHLBI exome sequencing and 1000 genomes project only. Only nonsynonymous and splice variants were included in analyses.

\*\* Probability that the observed frequency of cases carrying multiple Mendelian ALS gene variants is in excess of chance expectation (see Materials and Methods for details)

Total number of cases=444, total number of controls =311

**Table S4: Co-occurrence of ALS gene variant**

| <b>*Frequency Threshold</b> | <b>Cases with 1 variant</b> | <b>Cases with 2 variants</b> | <b>Controls with 1 variant</b> | <b>Controls with 2 variants</b> | <b>**p</b> |
|-----------------------------|-----------------------------|------------------------------|--------------------------------|---------------------------------|------------|
| 0                           | 77                          | 6                            | 34                             | 4                               | 0.85       |
| 0.0005                      | 103                         | 9                            | 50                             | 7                               | 0.99       |
| 0.005                       | 151                         | 30                           | 95                             | 13                              | 1.00       |
| 0.05                        | 247                         | 90                           | 160                            | 72                              | 1.00       |

\*Denotes the cut-off carrier frequency for variants among European and Global reference cohorts. Variants exceeding a given threshold were excluded from analysis. Reference cohorts included individuals resequenced by NHLBI exome sequencing and 1000 genomes project only. Only nonsynonymous and splice variants were included in analyses.

\*\* Probability that the observed frequency of cases carrying multiple ALS gene variants is in excess of chance expectation (see Materials and Methods for details)

Total number of cases=444, total number of controls =311

**Table S5: Carriers of established and possible ALS variants**

| Gene       | Mutation                                           | C9orf72 Repeat Expansion | Family History | Gender | Site Of Onset | Cognitive Status     | Age Of Onset (Years) | Survival (Months) |
|------------|----------------------------------------------------|--------------------------|----------------|--------|---------------|----------------------|----------------------|-------------------|
| ALS2       | c.2098A>G(p.Thr700Ala)                             | -                        | -              | M      | spinal        | NA                   | 67                   | 39                |
| ALS2       | c.3094C>T(p.Arg1032Cys)                            | -                        | -              | M      | bulbar        | co-morbid FTD        | 57                   | >61               |
| ALS2       | c.2408A>G(p.Lys803Arg)                             | -                        | -              | M      | spinal        | NA                   | 58                   | >44               |
| ALS2       | c.2606A>C(p.Gln869Pro)                             | -                        | -              | M      | spinal        | normal               | 57                   | >55               |
| ALS2, SETX | c.2098A>G(p.Thr700Ala),<br>c.7682C>T(p.Ser2561Leu) | -                        | -              | M      | spinal        | NA                   | 84                   | 58                |
| C9orf72    |                                                    | +                        | +              | M      | spinal        | NA                   | 35                   | 70                |
| C9orf72    |                                                    | +                        | +              | M      | bulbar        | NA                   | NA                   | NA                |
| C9orf72    |                                                    | +                        | -              | M      | both          | NA                   | 34                   | 67                |
| C9orf72    |                                                    | +                        | -              | F      | spinal        | NA                   | 51                   | 13                |
| C9orf72    |                                                    | +                        | -              | F      | bulbar        | NA                   | 60                   | 20                |
| C9orf72    |                                                    | +                        | -              | M      | bulbar        | NA                   | 47                   | 30                |
| C9orf72    |                                                    | +                        | -              | M      | spinal        | NA                   | 66                   | 8                 |
| C9orf72    |                                                    | +                        | -              | M      | spinal        | NA                   | 44                   | 23                |
| C9orf72    |                                                    | +                        | -              | F      | bulbar        | NA                   | 43                   | 36                |
| C9orf72    |                                                    | +                        | -              | F      | bulbar        | NA                   | 52                   | 17                |
| C9orf72    |                                                    | +                        | -              | M      | spinal        | NA                   | 68                   | NA                |
| C9orf72    |                                                    | +                        | +              | F      | bulbar        | NA                   | 82                   | 12                |
| C9orf72    |                                                    | +                        | -              | F      | spinal        | NA                   | 42                   | 54                |
| C9orf72    |                                                    | +                        | -              | M      | spinal        | NA                   | NA                   | NA                |
| C9orf72    |                                                    | +                        | -              | F      | spinal        | normal               | 55                   | 30                |
| C9orf72    |                                                    | +                        | +              | F      | both          | normal               | 44                   | 50                |
| C9orf72    |                                                    | +                        | -              | M      | spinal        | cognitively impaired | 55                   | 24                |

|                 |                         |   |   |   |        |                                        |    |     |
|-----------------|-------------------------|---|---|---|--------|----------------------------------------|----|-----|
| C9orf72         |                         | + | - | M | spinal | co-morbid FTD                          | 62 | 52  |
| C9orf72         |                         | + | + | M | spinal | co-morbid FTD                          | 56 | 16  |
| C9orf72         |                         | + | - | F | spinal | normal                                 | 44 | 37  |
| C9orf72         |                         | + | + | F | spinal | co-morbid FTD                          | 65 | 16  |
| C9orf72         |                         | + | + | M | spinal | co-morbid FTD                          | 65 | 25  |
| C9orf72         |                         | + | - | M | spinal | behaviourally impaired                 | 48 | >66 |
| C9orf72         |                         | + | - | F | bulbar | normal                                 | 63 | 14  |
| C9orf72         |                         | + | - | F | spinal | cognitively impaired                   | 49 | 37  |
| C9orf72         |                         | + | - | F | spinal | cognitively impaired                   | 62 | 18  |
| C9orf72         |                         | + | + | M | bulbar | normal                                 | 59 | 19  |
| C9orf72         |                         | + | + | F | bulbar | normal                                 | 64 | 41  |
| C9orf72         |                         | + | + | F | bulbar | cognitively impaired                   | 65 | 33  |
| C9orf72         |                         | + | + | M | bulbar | normal                                 | 66 | 32  |
| C9orf72         |                         | + | - | M | spinal | co-morbid FTD                          | 36 | 46  |
| C9orf72         |                         | + | - | M | bulbar | NA                                     | 59 | 25  |
| C9orf72         |                         | + | - | F | spinal | NA                                     | 72 | >87 |
| C9orf72         |                         | + | - | M | bulbar | No                                     | 44 | 29  |
| C9orf72         |                         | + | + | M | spinal | cognitively and behaviourally impaired | 59 | 17  |
| C9orf72         |                         | + | + | F | spinal | NA                                     | 52 | >41 |
| C9orf72, CHMP2B | c.123G>T(p.Gln41His)    | + | - | M | spinal | NA                                     | 55 | 48  |
| C9orf72, SETX   | c.2842C>A(p.Pro948Thr)  | + | + | M | bulbar | co-morbid FTD                          | 58 | 17  |
| C9orf72, SPG11  | c.3680A>G(p.Lys1227Arg) | + | + | M | spinal | NA                                     | 65 | 43  |
| CHMP2B          | c.118A>G(p.Lys40Glu)    | - | - | M | spinal | NA                                     | 61 | NA  |

|              |                                          |    |   |   |        |                                        |    |      |
|--------------|------------------------------------------|----|---|---|--------|----------------------------------------|----|------|
| DCTN1        | c.2887-2A>G()                            | -  | - | M | spinal | NA                                     | 63 | 26   |
| DCTN1, SPG11 | c.2887-2A>G(),<br>c.1529G>A(p.Ser510Asn) | -  | - | M | spinal | NA                                     | 63 | 42   |
| DPP6         | c.883G>A(p.Glu295Lys)                    | -  | - | F | bulbar | normal                                 | 62 | 21   |
| ELP3         | c.326G>A(p.Cys109Tyr)                    | NA | - | F | spinal | NA                                     | 68 | 12   |
| ELP3         | c.206G>T(p.Arg69Leu)                     | -  | - | F | bulbar | cognitively impaired                   | 68 | 21   |
| ELP3         | c.326G>A(p.Cys109Tyr)                    | -  | + | M | bulbar | normal                                 | 67 | NA   |
| FGGY         | c.1716G>A(p.Met572Ile)                   | -  | - | M | spinal | NA                                     | 75 | 11   |
| FUS          | c.1574C>T(p.Pro525Leu)                   | NA | - | M | spinal | NA                                     | 13 | 17   |
| FUS          | c.1574C>T(p.Pro525Leu)                   | -  | - | F | bulbar | normal                                 | 21 | 11   |
| HFE          | c.766G>A(p.Val256Ile)                    | -  | - | M | spinal | cognitively impaired                   | 76 | 7    |
| ITPR2        | c.3614G>A(p.Arg1205Gln)                  | -  | - | F | bulbar | NA                                     | 79 | 19   |
| MAPT         | c.698C>T(p.Pro233Leu)                    | -  | - | M | spinal | normal                                 | 57 | >55  |
| MAPT         | c.284C>T(p.Thr95Met)                     | -  | - | F | spinal | normal                                 | 81 | >48  |
| OPTN         | c.1192C>G(p.Gln398Glu)                   | -  | - | F | spinal | NA                                     | NA | NA   |
| PON2         | c.661T>G(p.Ser221Ala)                    | -  | - | F | spinal | co-morbid FTD                          | 58 | 12   |
| SETX         | c.7645G>A(p.Val2549Ile)                  | -  | - | F | spinal | NA                                     | 64 | 24   |
| SETX         | c.5842A>G(p.Met1948Val)                  | -  | - | M | spinal | NA                                     | 47 | NA   |
| SETX         | c.2755G>C(p.Val919Leu)                   | -  | - | M | bulbar | co-morbid FTD                          | 68 | 15   |
| SETX         | c.7682C>T(p.Ser2561Leu)                  | -  | - | M | spinal | cognitively impaired                   | 57 | 33   |
| SETX         | c.5587A>G(p.Thr1863Ala)                  | -  | + | F | other  | NA                                     | 61 | >103 |
| SETX         | c.7645G>A(p.Val2549Ile)                  | -  | - | F | bulbar | cognitively and behaviourally impaired | 76 | 26   |
| SETX         | c.2975A>G(p.Lys992Arg)                   | -  | + | M | bulbar | NA                                     | 78 | 14   |
| SPG11        | c.4343G>A(p.Cys1448Tyr)                  | -  | - | M | spinal | NA                                     | 63 | 33   |



|              |                                                  |   |   |   |        |        |    |     |
|--------------|--------------------------------------------------|---|---|---|--------|--------|----|-----|
| SPG11        | c.1930A>T(p.Thr644Ser)                           | - | + | F | bulbar | NA     | 68 | 27  |
| SPG11        | c.394A>G(p.Ser132Gly)                            | - | - | M | spinal | normal | 51 | >42 |
| SPG11        | c.2577A>C(p.Gln859His)                           | - | - | F | bulbar | NA     | 59 | NA  |
| SPG11        | c.7324G>C(p.Ala2442Pro)                          | - | - | M | spinal | NA     | 60 | 21  |
| TARDBP, ALS2 | c.859G>A(p.Gly287Ser),<br>c.2566A>G(p.Thr856Ala) | - | - | M | bulbar | normal | 67 | >51 |
| TARDBP, SETX | c.859G>A(p.Gly287Ser),<br>c.814C>G(p.His272Asp)  | - | - | F | bulbar | NA     | 66 | 49  |
| UNC13A       | c.3098T>A(p.Val1033Asp)                          | - | - | M | spinal | NA     | 80 | 25  |
| VCP          | c.2249A>G(p.Asn750Ser)                           | - | - | F | bulbar | NA     | 63 | >35 |

*ALS2* - ENST00000264276; *CHMP2B* - ENST00000263780; *DCTN1* - ENST00000361874; *DPP6* - ENST00000377770; *ELP3* - ENST00000256398;  
*FGGY* - ENST00000371218; *FUS* - ENST00000254108; *HFE* - ENST00000357618; *ITPR2* - ENST00000381340; *MAPT* - ENST00000344290;  
*OPTN* - ENST00000263036; *PON2* - ENST00000222572; *SETX* - ENST00000224140; *SPG11* - ENST00000261866; *TARDBP* - ENST00000240185;  
*UNC13A* - ENST00000519716; *VCP* - ENST00000358901
